# Supplementary material for: Development of the European Health Interview Survey - Physical Activity Questionnaire (EHIS-PAQ) to monitor physical activity in the European Union
Source: PubMed Central journal article supplement (PMC4667448; doi:10.1186/s13690-015-0110-z), 2015-12-02
Supplement: 13690_2015_110_MOESM1_ESM.pdf [file 13690_2015_110_MOESM1_ESM.pdf]

## Supplemental File 1

The following survey item booklets contain information on survey items in the field of physical activity taken from the **European Health Interview & Health Examination Surveys (HIS/HES) Database**. Please note the following copyright and regulations of the HIS/HES Database:

### **“Dissemination and or use of HIS/HES database information and copyright protection**

In respect of the laws of intellectual property and its related copyright protection, a strong effort has been made by the database developers to include adequate information on this subject for each survey.

Usually a health survey can contain several (parts of) standardized instruments of which the original version is protected by copyrights. Users of the database have the possibility to verify for each and every survey if any copyright rules are applicable.

You are therefore kindly requested to verify under "HIS or HES survey methodology" subtitle "Instruments" and field 'submitted to copyrights' before possibly using one of the instruments mentioned in the database.

Each institute responsible for a particular survey has been requested to answer the question of submission to copyrights. There are three answer possibilities incorporated into the database: 'Yes, followed by the specification of the instrument', 'No' and 'Unknown'. In case the answer is 'unknown' the user is advised to contact the responsible institute in order to obtain further information prior to copying any details.

Neither the Scientific Institute of Public Health (IPH) Brussels nor the National Institute of Public Health, Helsinki - responsible for the development of this European Health Surveys Database - can be held responsible for breach of copyright regulations by the users of this database”.

**Source:** Scientific Institute of Public Health, Brussels and National Institute of Public Health, Helsinki:  
**European Health Interview & Health Examination Surveys Database. Available from:**  
<https://hishes.wiv-isp.be/index.php?hishes=copyright> (accessed: 4 November 2015).  
Brussels: Scientific Institute of Public Health; 2015.

International Survey Items concerning

**Work-related Physical Activity**

1994 - 2007

## TABLE OF CONTENTS

|                         |    |
|-------------------------|----|
| <b>1994</b>             |    |
| Denmark – DK 01         | 3  |
| <b>1995</b>             |    |
| Spain – ES01            | 4  |
| United Kingdom – UK 10  | 5  |
| <b>1996</b>             |    |
| Poland – PL 04          | 6  |
| <b>1997</b>             |    |
| Finland – FI 02         | 7  |
| <b>1998</b>             |    |
| Germany – DE 05         | 8  |
| Ireland – IE 01         | 9  |
| United Kingdom – UK 02  | 10 |
| United Kingdom – UK 09  | 11 |
| United Kingdom – UK 13  | 12 |
| <b>1999</b>             |    |
| Spain – ES 04           | 13 |
| France – FR 06          | 14 |
| Italy – IT 01           | 16 |
| <b>2000</b>             |    |
| Canada – CA 01          | 17 |
| Cyprus – CY 02          | 18 |
| Finland – FI 01         | 19 |
| International – EUPASS  | 20 |
| <b>2001</b>             |    |
| Spain – ES 02           | 21 |
| Netherlands – NL 02     | 22 |
| Netherlands – NL 03     | 23 |
| <b>2002</b>             |    |
| Switzerland – CH 02     | 24 |
| Czech Republic – CZ 01  | 25 |
| Estonia – EE 04         | 26 |
| Finland – FI 07         | 27 |
| Lithuania – LT 02       | 28 |
| Latvia – LV 03          | 29 |
| Malta – MT 01           | 30 |
| Netherlands – NL 05     | 31 |
| United Kingdom – UK 28  | 32 |
| <b>2003</b>             |    |
| Canada – CA 02          | 33 |
| Spain – ES 03           | 34 |
| Finland – FI 10         | 35 |
| Croatia – HR 04         | 36 |
| International – INT 12  | 37 |
| Netherlands – NL 08     | 38 |
| <b>2004</b>             |    |
| Estonia – EE 07         | 39 |
| Finland – FI 12         | 40 |
| International – FINBALT | 41 |
| Netherlands – NL 07     | 42 |
| Poland – PL 06          | 43 |

## 2005

|                 |    |
|-----------------|----|
| Canada – CA 03  | 44 |
| Finland – FI 19 | 45 |
| Italy – IT 08   | 46 |

## 2006

|                       |    |
|-----------------------|----|
| Serbia – CS 01        | 47 |
| Spain – ES 06         | 48 |
| France – FR 18        | 49 |
| Lithuania – LT 05     | 50 |
| United States – US 04 | 51 |

## 2007

|                     |    |
|---------------------|----|
| Australia – AU 04   | 52 |
| Canada – CA 04      | 53 |
| Canada – CA 05      | 54 |
| Switzerland – CH 03 | 55 |
| Finland – FI 21     | 56 |
| Finland – FI 22     | 57 |
| Ireland – IE 09     | 58 |
| Iceland – IS 04     | 59 |

Country: Denmark  
Survey: Danish Health and Morbidity Survey  
Survey Code: DK 01  
Year: 1994  
Type: Face to Face

---

Question 73

How would you describe the physical strain of your chief occupation?

Show card 13

mainly sedentary work which doesn't demand any physical effort  
work which to a great extent is performed standing or walking but apart from that doesn't demand any physical effort  
standing or walking work with many lifts or much carrying  
heavy or speedy work which is strenuous  
no information  
don't know  
not actively employed

Country: Spain  
Survey: National Health Survey  
Survey Code: ES 01  
Year: 1995  
Type: Face to Face

---

Question 28

We should now like you to tell us what type of physical exercise your work or usual activity involves. Of the possibilities on this card, which would you say best describes your main activity (at work, educational establishment, doing the housework, etc.)?

(SHOW CARD I)

Seated most of the day  
Standing most of the day, not moving about much, not much physical effort  
Walking, carrying a weight, frequently moving about  
Heavy work, tasks requiring a great deal of physical effort  
No answer

Country: United Kingdom  
Survey: The Scottish Health Survey  
Survey Code: UK 10  
Year: 1995  
Type: Face to Face + self administered

---

Question 351

When you're at work are you mainly sitting down, standing up or walking about?

- Sitting down
  - Standing up
  - Walking about
  - Equal time spent doing 2 or more of these
- 

Question 352

Does your work involve you moving between floors?

- Yes
  - No
- 

Question 354

Do you do any (other) climbing in the course of your work (ladders, scaffolding etc.)?

- Yes
  - No
- 

Question 355

Do you usually have to lift or carry things at work which you find heavy?

If yes, Is that just lifting or lifting and carrying?

- Lift heavy loads
- Lift and carry heavy loads
- No

Country: Poland  
Survey: Health Population Status in Poland in 1996  
Survey Code: PL 04  
Year: 1996  
Type: Face to Face

---

Questions 45 - 46

Does the child participate in lessons of physical education?

No, he/she is released  
Yes

If so how many hours per week?

...



Country: Finland  
Survey: FINRISK 97  
Survey Code: FI 02  
Year: 1997  
Type: Face to Face + self administered

---

#### Question 67

How demanding is your work physically? The activity at work is divided into four groups.

My work is mainly done sitting down and I do not walk much during my working hours (f. ex. a clock smith, radio mechanic and industrial seamstress, office work at a desk).

I walk quite much in my work, but I do not have to lift or carry heavy objects (f. ex. a foreman and store assistant, light industrial worker, office work which requires walking).

I have to walk and lift much or to take the stairs or go uphill (f. ex. a carpenter or cattle minder/dairy work, engineering shop or other heavier industrial work).

My work is heavy manual labour in which I have to lift or carry heavy objects, to dig, shovel or chop (f. ex. forestry, heavy farm work, heavy construction or industrial work).

Country: Germany  
Survey: German National Health Examination and Interview Survey  
Survey Code: DE 05  
Year: 1998  
Type: ???

---

Question 89

Is your present occupation characterised by:

No  
Yes

If yes, Do you feel that your health is impaired as a result?

No  
Yes

Strenuous physical activity (such as one sided posture,  
carrying heavy objects...)  
noise, dust, gases, vapours, "bad air"  
stress at work (such as pressure of time or pressure to  
do well, hard concentration, bad working  
atmosphere), job worries  
overtime, long working hours  
shift / night work; If so:  
Changing shifts excl. Night shifts  
Changing shifts incl. Night shifts  
Night shifts only (not changing shifts)

---

Question 89A

How long have you had this job?

... years ... Months

Country: Ireland  
Survey: Survey of Lifestyle, Attitudes and Nutrition (SLÁN)  
Survey Code: IE 01  
Year: 1998  
Type: Self administered

---

Question B6

Thinking about your job in general would you say that you are

- Very physically active
- Fairly physically active
- Not very physically active
- Not at all physically active

Country: United Kingdom  
Survey: Health Education Monitoring Survey  
Survey Code: UK 02  
Year: 1998  
Type: Face to Face

---

Question 102

Thinking about your job in general, (ASK ABOUT MAIN JOB ONLY) would you say that you are

- very physically active
- fairly physically active
- not very physically active
- or not at all physically active in your job?

Country: United Kingdom  
Survey: Health Survey for England  
Survey Code: UK 09  
Year: 1998  
Type: Face to Face + self administered

---

Question 162

Thinking about your job in general would you say that you are

very physically active,  
fairly physically active,  
not very physically active,  
or, not at all physically active in your job?

---

Question 163

When you're at work are you mainly sitting down, standing up or walking about?

Sitting down  
Standing up  
Walking about

---

Question 164

Do you do any climbing in the course of your work (ladders, scaffolding etc)?

Yes  
No

---

Question 165

Do you usually have to lift or carry things at work which you find heavy?  
Is that just lifting or lifting and carrying?

Yes - lift heavy loads  
Yes - lift and carry heavy loads  
No

Country: United Kingdom  
Survey: The Scottish health survey  
Survey Code: UK 13  
Year: 1998  
Type: Face to Face

---

Question 177

Thinking about your job in general would you say that you are

- ... very physically active,
- ... fairly physically active,
- ... not very physically active,
- ... or, not at all physically active in your job?

Country: Spain  
Survey: Impairments, Disabilities and Health Status Survey  
Survey Code: ES 04  
Year: 1999  
Type: Face to Face

---

Question 11.25

Specify how you perform or what type of physical exercise is involved in your job or main occupation, is, what better describes your main occupation at your place of work, teaching institution, home, etc.

Sitting down for most of the day  
Standing for most of the day, with little movement or exertion  
Walking, carrying loads, moving about frequently  
Hard work, jobs that call for considerable physical Exertion

Country: France  
Survey: Health Barometer  
Survey Code: FR 06  
Year: 1999  
Type: Telephone

---

Question 170

During the LAST SEVEN DAYS, how many hours...  
did you spend at SCHOOL, GRAMMAR SCHOOL,  
UNIVERSITY ?

... HOURS  
... MINUTES  
NONE)  
DON'T KNOW

Athletics (apart from jogging)  
Rowing  
Badminton  
Basket ball  
Canoeing-kayaking  
Cycling  
Dancing  
Horse riding  
Rock climbing  
Football  
Golf  
Gymnastics  
Handball  
Jogging  
Judo  
Karate  
Walking (leisure) - Hiking  
Body-building  
Swimming  
Ice skating  
Pétanque (bowls)  
Windsurfing  
Diving  
Qi Gong  
Roller blading/Roller skating  
Rugby  
Skiing  
Surfing  
Tai chi chuan  
Tennis  
Table tennis (ping-pong)  
Archery  
Volleyball  
Mountain biking  
Yoga



Other 1, specify: ...  
Other 2, specify: ...  
Other 3, specify: ...  
Other 4, specify: ...  
Other 5, specify: ...

---

Question 173

During the LAST SEVEN DAYS, how many hours...  
did you spend AT WORK OR DOING THINGS AS PART  
OF YOUR EMPLOYMENT ?

... HOURS  
... MINUTES  
NONE  
DON'T KNOW

Athletics (apart from jogging)  
Rowing  
Badminton  
Basket ball  
Canoeing-kayaking  
Cycling  
Dancing  
Horse riding  
Rock climbing  
Football  
Golf  
Gymnastics  
Handball  
Jogging  
Judo  
Karate  
Walking (leisure) - Hiking  
Body-building  
Swimming  
Ice skating  
Pétanque (bowls)  
Windsurfing  
Diving  
Qi Gong  
Roller blading/Roller skating  
Rugby  
Skiing  
Surfing  
Tai chi chuan  
Tennis  
Table tennis (ping-pong)  
Archery  
Volleyball  
Mountain biking  
Yoga  
Other 1, specify: ...  
Other 2, specify: ...  
Other 3, specify: ...  
Other 4, specify: ...  
Other 5, specify: ...

Country: Italy  
Survey: Health Conditions and the Use of Health Services  
Survey Code: IT 01  
Year: 1999  
Type: Face to Face

---

Question 15.9

Can your work activity mainly be considered a physical activity?

Light, I spend most of the time sitting down  
Moderate, I spend most of the time standing up  
Heavy, till perspiring at least half of the working hours

Country: Canada  
Survey: Canadian Community Health Survey Cycle 1.1  
Survey Code: CA 01  
Year: 2000  
Type: Face to Face

---

Question PA4A

Next, some questions about the amount of time you spent in the past 3 months on physical activity at work or while doing daily chores around the house, but not leisure time activity.

In a typical week in the past 3 months, how many hours did you usually spend walking to work or to school or while doing errands?

- None
- Less than 1 hour
- From 1 to 5 hours
- From 6 to 10 hours
- From 11 to 20 hours
- More than 20 hours

Country: Cyprus  
Survey: Population Risk Factors Survey  
Survey Code: CY 02  
Year: 2000  
Type: Face to Face

---

Question 32

How much physical activity do you have at work?  
(If you do not work, mark 1)

My work is mainly sitting work. I do not walk much at work.  
(Examples: office work - radio mechanic, tailor)

I walk in my work quite a lot but I do not have to lift or carry heavy things.  
(Examples: shop assistant, light industrial work, office work where one has to move, housewife, nurse))

I must walk and carry a lot or often climb stairs or go uphill in my work.  
(Examples: carpenters or farmhand, work in engine shop, heavy industrial work)

My work is heavy physical work, where I have to carry or lift heavy things, to shovel or cut a lot.  
(I am in construction and industrial work)

Country: Finland  
Survey: Survey on health behaviour  
Survey Code: FI 01  
Year: 2000  
Type: Self administered

---

Question 90

How physically strenuous is your work? Choose the alternative that best describes your situation. If you do not work, mark 'my work is mainly sedentary and I don't walk much'

- my work is mainly sedentary and I don't walk much
- I walk quite a lot in my work, but do not need to lift or carry heavy objects
- in my work I need to walk a great deal and often need to walk upstairs or uphill
- my work is heavy physical work where I need to lift or carry heavy objects, dig, shovel or chop, etc.

Country: International  
Survey: European Physical Activity Surveillance System (EUPASS)  
Survey Code:  
Year: 2000  
Type: Telephone

---

Question B5a

How much physical activity did you do in your place of work in the last 7 days?

Much  
Moderate  
Little or no

Country: Spain  
Survey: National Health Survey  
Survey Code: ES 02  
Year: 2001  
Type: Face to Face

---

Question P39

Please tell us about the kind of physical fitness your work or regular activities demand. Choose from the list on the card. Which option best describes your daily routine? (work, studies, household work, etc.)

(SHOW CARD K)

Sat down most of the day  
Stood up most of the day without much movement or effort to make  
Walking. Bearing weight, moving frequently  
Heavy work, intensive physical force required  
Don't know

Country: Netherlands  
Survey: Patient survey - Second Dutch National Survey of General Practice  
Survey Code: NL 02  
Year: 2001  
Type: Face to Face

---

Question LRV44t2

We will continue with physical activities at work and school.

How much time a week do you spend on light to moderately strenuous work? (sitting/standing work, walking from time to time, such as office work)?

Number of hours: ...

---

Question LRV44t3

Number of minutes: ...

---

Question LRV44u2

And how much time per week do you spend on very strenuous work (on your feet, walking around, regularly lifting heavy objects)?

Number of hours: ...

---

Question LRV44u3

Number of minutes: ...



Country: Netherlands  
Survey: Continuous Quality of Life Survey  
Survey Code: NL 03  
Year: 2001  
Type: Self administered

---

Question 366

Physical activity at work or in school

light and moderately strenuous work (sitting/standing work,  
with some walking, like desk work or walking with light loads)

heavy work (running work, or work whereby heavy loads  
have to be carried or lifted)

not applicable

Number of hours per week

... hours

Country: Switzerland  
Survey: Swiss Health Survey 2002  
Survey Code: CH 02  
Year: 2002  
Type: Telephone

---

Question 44.02

And in your work, whether a professional activity, household chores or gardening, how many days a week do you perspire (on average)?

... days a week (between 0 and 7 days)  
no reply

Country: Czech Republic  
Survey: Sample Survey of the Health Status of the Czech Population  
Survey Code: CZ 01  
Year: 2002  
Type: Face to Face

---

Question 24b

Physical activity in your work:  
Circle one type of employment according to physical burden:

- hard, physically difficult work
- easy, physically less difficult work
- sedentary
- physically not difficult work
- unemployed

Country: Estonia  
Survey: Health Behaviour Among Estonian Adult Population  
Survey Code: EE 04  
Year: 2002  
Type: Face to Face

---

Question 67

How physically strenuous is your work?

- Very light (mainly sitting)
- Light (mainly walking)
- Medium (lifting, carrying light loads)
- Heavy manual work (climbing, carrying heavy loads)

Country: Finland  
Survey: FINRISK 2002  
Survey Code: FI 07  
Year: 2002  
Type: Self administered

---

### Question 73

How demanding is your work physically?  
The activity at work is divided into four groups. If you do not work mark 1.

My work is mainly done sitting down and I do not walk much during my working hours (e.g. a clocksmith, radio mechanic and industrial seamstress, office work at a desk).

I walk quite much in my work, but I do not have to lift or carry heavy objects (e.g. a foreman and store assistant, light industrial worker, office work which requires walking).

I have to walk and lift much or to take the stairs or go uphill (e.g. a carpenter or cattle minder/dairy work, engineering shop or other heavier industrial work).

My work is heavy manual labor in which I have to lift or carry heavy objects, to dig, shovel or chop (e.g. forestry, heavy farm work, heavy construction or industrial work).

Country: Lithuania  
Survey: Lithuanian Health Behaviour Monitoring  
Survey Code: LT 02  
Year: 2002  
Type: Self administered

---

Question 59

How physically strenuous is your work?

- very light (mainly sitting)
- light (mainly walking)
- medium (lifting, carrying light loads)
- heavy manual work (climbing, carrying heavy loads)

Country: Latvia  
Survey: Health Behaviour Survey of Latvian Adult Population  
Survey Code: LV 03  
Year: 2002  
Type: Self administered

---

Question 80

Does your work require much physical activity?

Very light (mostly sitting)

Light (sitting and standing work, which requires some walking )

Medium (work which requires much walking, lifting and relocation of heavy objects)

Heavy manual labour (forestry, heavy agriculture, heavy building work, road-works, etc.)

Country: Malta  
Survey: First National Health Interview Survey  
Survey Code: MT 01  
Year: 2002  
Type: Face to Face

---

Question 66

PHYSICAL ACTIVITY AT WORK

Thinking about your job in general, would you say that during work-time you are...

- I am not gainfully occupied
- Very physically active
- Fairly physically active
- Not very physically active
- Not at all physically active



Country: Netherlands  
Survey: Continuous Quality of Life Survey  
Survey Code: NL 05  
Year: 2002  
Type: Self administered

---

Question 366

Physical activity at work or in school

light and moderately strenuous work (sitting/standing work,  
with some walking, like desk work or walking with light loads)

heavy work (running work, or work whereby heavy loads  
have to be carried or lifted)

not applicable

Number of hours per week

... hours

Country: United Kingdom  
Survey: Health Survey for England  
Survey Code: UK 28  
Year: 2002  
Type: Face to Face

---

Question 145

Can I just check, is (name of child) at school in reception class yet?

Yes  
No

---

Question 166

Thinking about your job in general would you say that you are

...READ OUT...

...very physically active,  
...fairly physically active,  
...not very physically active,  
...or, not at all physically active in your job?

Country: Canada  
Survey: Canadian Community Health Survey Cycle 2.1  
Survey Code: CA 02  
Year: 2003  
Type: Face to Face + Telephone

---

Question WST\_Q408

Your job required a lot of physical effort.

- Strongly agree
- Agree
- Neither agree nor disagree
- Disagree
- Strongly disagree

Country: Spain  
Survey: National Health Survey 2003  
Survey Code: ES 03  
Year: 2003  
Type: Face to Face

---

Question 31

Which of the following possibilities best describes your main activity at work, school, home (domestic work), etc.?

Seated the majority of the working day

Standing up most of the working day without carrying out large journeys or efforts

Walking, carrying some weight, frequent journeys which do not require an important physical effort

Carrying out tasks which require an important physical effort

Country: Finland  
Survey: Health Behaviour among the Finnish Adult Population  
Survey Code: FI 10  
Year: 2003  
Type: Face to Face

---

Question 85

How physically strenuous is your work?

Choose the alternative that best describes your situation. If you do not work, mark 1

my work is mainly sedentary and I don't walk much.

my work is mainly sedentary and I don't walk much

I walk quite a lot in my work, but do not need to lift or carry heavy objects

in my work I need to walk a great deal and often need to walk upstairs or uphill

my work is heavy physical work where I need to lift or carry heavy objects, dig, shovel, or chop, etc.

Country: Croatia  
Survey: Croatian Health Survey  
Survey Code: HR 04  
Year: 2003  
Type: Face to Face

---

Question PHA 02

How physically strenuous is your work?

- Very light (mainly sitting)
- Light (mainly walking)
- Moderate (lifting, carrying light loads)
- Hard physical work (climbing, carrying heavy loads)

Country: International  
Survey: Joint Canada/United States Survey of Health (JCUSH)  
Survey Code: INT 12  
Year: 2003  
Type: Telephone

---

Question PAC\_Q04A

Next, some questions about the amount of time you spent in the past 3 months on physical activity at work or while doing daily chores around the house, but not leisure time activity.

In a typical week in the past 3 months, how many hours did you usually spend walking to work or to school or while doing errands?

- None
- Less than 1 hour
- From 1 to 5 hours
- From 6 to 10 hours
- From 11 to 20 hours
- More than 20 hours

Country: Netherlands  
Survey: Continuous Quality of Life Survey  
Survey Code: NL 08  
Year: 2003  
Type: Self administered

---

Question 366

Physical activity at work or in school

light and moderately strenuous work (sitting/standing work,  
with some walking, like desk work or walking with light loads)

heavy work (running work, or work whereby heavy loads  
have to be carried or lifted)

not applicable

Number of hours per week

... hours



Country: Estonia  
Survey: Health behaviour among Estonian adult population  
Survey Code: EE 07  
Year: 2004  
Type: Self administered

---

Question 74

At your work place at the moment, are the possibilities to engage in physical exercise under favourable conditions (partial return of monthly fees in sport clubs, paying rent to sport facilities etc)?

yes  
no  
I do not work

---

Question 75

How physically strenuous is your work?

very light (mainly sitting)  
light (mainly walking)  
medium (lifting, carrying light loads)  
heavy (climbing, carrying heavy loads)

Country: Finland  
Survey: Health Behaviour among the Finnish Adult Population  
Survey Code: FI 12  
Year: 2004  
Type: Face to Face

---

Question 75

How physically strenuous is your work?  
Choose the alternative that best describes your situation. If you do not work,  
mark 'my work is mainly sedentary and I don't walk much'.

my work is mainly sedentary and I don't walk much

I walk quite a lot in my work, but do not need to lift or carry heavy objects

in my work I need to walk a great deal and often need to walk upstairs or uphill

my work is heavy physical work where I need to lift or carry heavy objects, dig,  
shovel, or chop, etc.

Country: International (Finland, Baltic States)

Survey: FINBALT Health Monitor

Survey Code:

Year: 2004

Type: Self administered

---

Question 57

How physically strenuous is your work?

- 1 very light (mainly sitting)
- 2 light (mainly walking)
- 3 medium (lifting, carrying light loads)
- 4 heavy manual work (climbing, carrying heavy loads)

Country: Netherlands  
Survey: Continuous Quality of Life Survey  
Survey Code: NL 07  
Year: 2004  
Type: Self administered

---

Question 343

Physical activity at work or in school

light and moderately strenuous work (sitting/standing work, with some walking, like desk work or walking with light loads)

heavy work (running work, or work whereby heavy loads have to be carried or lifted)

not applicable

Number of hours per week

... hours

Country: Poland  
Survey: Health Population Status  
Survey Code: PL 06  
Year: 2004  
Type: Face to Face

---

Question 54

Does the child participate in physical education (gym) in school?

Yes

No, he/she

Country: Canada  
Survey: National Population Health Survey (NPHS)  
Survey Code: CA 03  
Year: 2005  
Type: Face to Face + Telephone

---

Question PA\_Q4A

Next, some questions about the amount of time you spent in the past 3 months on physical activity at work or while doing daily chores around the house, but not leisure time activity.

In a typical week in the past 3 months, how many hours did you usually spend walking to work or to school or while doing errands?

- None
- Less than 1 hour
- From 1 to 5 hours
- From 6 to 10 hours
- From 11 to 20 hours
- More than 20 hours

Country: Finland  
Survey: Health Behaviour among the Finnish Adult Population  
Survey Code: FI 19  
Year: 2005  
Type: Self administered

---

Question 80

How physically strenuous is your work? Choose the alternative that best describes your situation. If you do not work, mark 'my work is mainly sedentary and I don't walk much'.

my work is mainly sedentary and I don't walk much

I walk quite a lot in my work, but do not need to lift or carry heavy objects

in my work I need to walk a great deal and often need to walk upstairs or uphill

my work is heavy physical work where I need to lift or carry heavy objects, dig, shovel or chop, etc.

Country: Italy  
Survey: Health Conditions and the Use of Health Services 2004-2005  
Survey Code: IT 08  
Year: 2005  
Type: Face to Face

---

Question 2.9

(For those who are working)

How much time on average each week do you devote to work (for the occasional workers please refer to an average working week):

Less than one hour  
N° of hours ... per week

---

Question 2.10

Your work activity is characterised by a physical activity that is mainly?

Light, I spend most of the time sitting  
Moderate, I spend most of the time standing or walking  
Heavy, till perspiring



Country: Serbia  
Survey: National Health Survey, Serbia 2006  
Survey Code: CS 01  
Year: 2006  
Type: Face to Face + self administered

---

Question SV4

How physically strenuous is the job that you do?  
Answers are given only by employed or self employed (farmers included)

Mainly sitting  
Mainly standing/walking, but not carrying heavy loads  
Walking a lot, climbing up the stairs and/or lifting loads  
Carrying/lifting heavy loads

---

Question SV4

Do you regularly attend physical education classes at school?

I avoid whenever I can  
I am excused  
Yes, on a regular basis  
There are no conditions

Country: Spain  
Survey: National Health Survey  
Survey Code: ES 06  
Year: 2006  
Type: Face to Face

---

Question 90

Which of the following possibilities best describes your main activity at your place of work, education centre, home (household chores), etc?

Seated most of the day

Standing up most of the day, without moving around a lot or making a great deal of effort

Walking, carrying a bit of weight, moving around frequently

Doing tasks requiring a great deal of physical effort

Country: France  
Survey: National survey on nutrition and health (ENNS)  
Survey Code: FR 18  
Year: 2006  
Type: Face to Face

---

Question E59

During the past week, did your child have a PE or other sports lessons at school?

- Yes,
- No, he/she was excused
- No, no lesson was scheduled
- Doesn't know
- Refuses to answer

Country: Lithuania  
Survey: Lithuanian health behaviour monitoring  
Survey Code: LT 05  
Year: 2006  
Type: Self administered

---

Question 75

How physically strenuous is your work?

- very light (mainly sitting)
- light (mainly walking)
- medium (lifting, carrying light loads)
- heavy manual work (climbing, carrying heavy loads)

Country: United Kingdom  
Survey: Health Survey for England  
Survey Code: UK 33  
Year: 2006  
Type: Face to Face

---

Question Work

I'd like to ask you about some of the things you have done in the past four weeks that involve physical activity, this could be at work/college or in your free time. (Can I just check) were you in paid employment or self-employed in the past four weeks?

Yes  
No

---

Question Active

Thinking about your job in general would you say that you are ...

... very physically active,  
... fairly physically active,  
... not very physically active,  
... or, not at all physically active in your job?

Country: Australia  
Survey: National Health Survey  
Survey Code: AU 04  
Year: 2007  
Type: Face to Face

---

Question EXER\_Q24

When [you are/(proxy name) is] at work, which of the following best describes what [you do/he does/she does] on a typical work day?

- Mostly sitting
- Mostly standing
- Mostly walking
- Mostly heavy labour or physically demanding work
- Don't know

Country: Canada  
Survey: Canadian Health Measures Survey  
Survey Code: CA 04  
Year: 2007  
Type: Face to Face

---

Question PAC\_Q21 I

Next, some questions about the amount of time spent in the past 3 months on physical activity at work, while doing daily chores around the house, or doing errands, but not leisure time activity.

In a typical week in the past 3 months, how many hours did you usually spend walking to work or to school or while doing errands?

- None
  - Less than 1 hour
  - From 1 to 5 hours
  - From 6 to 10 hours
  - From 11 to 20 hours
  - More than 20 hours
- 

Question CPA\_Q14

About how many hours a week does he usually take part in physical activity (that makes him out of breath or warmer than usual) in his class time at school?

- Never
- Less than 2 hours per week
- 2 to 3 hours per week
- 4 to 6 hours per week
- 7 or more hours per week

Country: Canada  
Survey: Canadian Community Health Survey (CCHS)  
Survey Code: CA 05  
Year: 2007  
Type: Face to Face + Telephone

---

Question WST\_Q408

Your job required a lot of physical effort.

- Strongly agree
- Agree
- Neither agree nor disagree
- Disagree
- Strongly disagree



Country: Switzerland  
Survey: Swiss Health Survey  
Survey Code: CH 03  
Year: 2007  
Type: Telephone + self administered

---

Question 46.02

And how many days per week do you work up a sweat (on average) while working, either in your job or working at home or in the garden?

... days per week (0 to 7 days)  
No answer

---

Question 27

What about the physical stress/exertion at work?

Picture 2 workplaces:

In workplace A a person is generally exposed to a great deal of physical stress or exertion.

In workplace B a person generally has to cope with practically no physical stress or exertion.

Which of these two workplaces is more similar to yours?

Exactly like workplace A  
Similar to workplace A  
Between A and B  
Similar to workplace B  
Exactly like workplace B

Country: Finland  
Survey: FINRISK 2007  
Survey Code: FI 21  
Year: 2007  
Type: Self administered

---

#### Question 78

How demanding is your work physically? The activity at work is divided into four groups.

My work is mainly done sitting down and I do not walk much during my working hours (e.g. a clock smith, radio mechanic and industrial seamstress, office work at a desk).

I walk quite much in my work, but I do not have to lift or carry heavy objects (e.g. a foreman and store assistant, light industrial worker, office work which requires walking).

I have to walk and lift much or to take the stairs or go uphill (e.g. a carpenter or cattle minder/dairy work, engineering shop or other heavier industrial work).

My work is heavy manual labour in which I have to lift or carry heavy objects, to dig, shovel or chop (e.g. forestry, heavy farm work, heavy construction or industrial work).

Country: Finland  
Survey: Health Behaviour and Health among the Finnish Adult Population  
Survey Code: FI 22  
Year: 2007  
Type: Self administered

---

Question 75

How physically strenuous is your work?

my work is mainly sedentary and I don't walk much  
I walk quite a lot in my work, but do not need to lift or carry heavy objects  
in my work I need to walk a great deal and often need to walk upstairs or uphill  
I do heavy physical work: I need to lift or carry heavy objects, dig, shovel, or chop, etc.

Country: Ireland  
Survey: Survey of Lifestyles, Attitudes and Nutrition SLAN  
Survey Code: IE 09  
Year: 2007  
Type: Face to Face

---

Question B15

Thinking about how active you are in your job, in general would you say you are ...?

- Very physically active
- Not very physically active
- Fairly physically active
- Not at all physically active
- Not applicable

Country: Iceland  
Survey: Health and wellbeing of Icelanders  
Survey Code: IS 04  
Year: 2007  
Type: Self administered

---

Question 56

What of the following would best describe the physical exertion in your work or study?

- Mostly sedentary work/study that does not require physical exertion
- My work/study requires walking or an upright position but not physical exertion
- My work/study requires walking or an upright position and lifting or carrying objects
- Manual labour/study requires a lot of physical exertion
- Does not apply, I am not employed or studying

International Survey Items concerning

**Household Physical Activity**

1992 - 2008

## TABLE OF CONTENTS

|                        |    |
|------------------------|----|
| <b>1992</b>            |    |
| United Kingdom – UK 03 | 2  |
| <b>1995</b>            |    |
| United Kingdom – UK 10 | 3  |
| <b>1998</b>            |    |
| Ireland – IE 01        | 6  |
| United Kingdom – UK 02 | 7  |
| United Kingdom – UK 09 | 9  |
| United Kingdom – UK 13 | 13 |
| <b>1999</b>            |    |
| Italy – IT 01          | 16 |
| <b>2000</b>            |    |
| International – EUPASS | 17 |
| Italy – IT 03          | 18 |
| Romania – RO 01        | 19 |
| <b>2001</b>            |    |
| Italy – IT 04          | 20 |
| Netherlands – NL 02    | 21 |
| Netherlands – NL 03    | 22 |
| <b>2002</b>            |    |
| Switzerland – CH 02    | 23 |
| Italy – IT 05          | 24 |
| Malta – MT 01          | 25 |
| Netherlands – NL 05    | 26 |
| United Kingdom – UK 28 | 27 |
| <b>2003</b>            |    |
| Netherlands – NL 08    | 30 |
| <b>2004</b>            |    |
| Netherlands – NL 07    | 31 |
| <b>2005</b>            |    |
| Italy – IT 08          | 32 |
| United Kingdom – UK 31 | 33 |
| <b>2006</b>            |    |
| United Kingdom – UK 33 | 35 |
| <b>2007</b>            |    |
| Switzerland – CH 03    | 38 |
| Sweden – LNU           | 39 |
| United Kingdom – UK 35 | 41 |
| <b>2008</b>            |    |
| France – FR 20         | 43 |
| United Kingdom – UK 36 | 44 |

Country: United Kingdom  
Survey: Health and Lifestyle Survey  
Survey Code: UK 03  
Year: 1992  
Type: Face to Face

---

Question 86

a. In the last 7 days, have you done any 'do it yourself'  
I mean house and car maintenance, building,  
carpentry, etc.?

Yes  
No

b. How much time, overall, did you spend on 'do it yourself'  
in the last 7 days?

... time  
Don't know

c. Would you describe any of this work 'heavy'?

Yes  
No  
Don't know



Country: United Kingdom  
Survey: The Scottish Health Survey  
Survey Code: UK 10  
Year: 1995  
Type: Face to Face + self administered

---

Question 190

During an average week, would you normally do any heavy housework of the kind listed on this card, or any similar type of heavy housework?

SHOW CARD C.

Yes  
No

---

Question 191

On how many occasions per week do you usually do this kind of heavy housework?

Less than once a week  
Once a week  
2-3 times a week  
4-5 times a week  
6-7 times a week or more

---

Question 192

How much time do you usually spend doing this kind of heavy housework?

Less than 10 minutes  
10 minutes, less than 20 minutes  
20 minutes, less than 30 minutes  
30 minutes, less than 2 hours  
2 hours or longer

---

Question 193

During an average week in the spring or summer, would you normally do any heavy gardening or DIY of the kind listed on this card, or any similar type of heavy gardening or DIY?

SHOW CARD D.

Yes

No

---

Question 194

During the spring or summer, on how many occasions per week do you usually do this kind of heavy gardening or DIY?

Less than once a week

Once a week

2-3 times a week

4-5 times a week

6-7 times a week or more

---

Question 195

How much time do you usually spend doing this kind of heavy gardening or DIY during the spring or summer?

Less than 10 minutes

10 minutes, less than 20 minutes

20 minutes, less than 30 minutes

30 minutes, less than 2 hours

2 hours or longer

---

Question 196

During an average week in the autumn or winter, would you normally do any heavy gardening or DIY of the kind listed on this card, or any similar type of heavy gardening or DIY?

SHOW CARD D.

Yes

No

---

Question 197

During the autumn or winter, on how many occasions per week do you usually do this kind of heavy gardening or DIY?

- Less than once a week
  - Once a week
  - 2-3 times a week
  - 4-5 times a week
  - 6-7 times a week or more
- 

Question 198

How much time do you usually spend doing this kind of heavy gardening or DIY during the autumn or winter?

- Less than 10 minutes
- 10 minutes, less than 20 minutes
- 20 minutes, less than 30 minutes
- 30 minutes, less than 2 hours
- 2 hours or longer

Country: Ireland  
Survey: Survey of Lifestyle, Attitudes and Nutrition (SLÁN)  
Survey Code: IE 01  
Year: 1998  
Type: Self administered

---

Question B3

Do you do light household work? (e.g. dusting, washing dishes, repairing clothes)

Seldom/Never  
1-3 times per month  
Once per week  
3-4 times per week  
Most days

---

Question B4

Do you do heavy household work? (e.g. vacuuming/hoovering, washing floors and windows, carrying rubbish bags)

Seldom/Never  
1-3 times per month  
Once per week  
3-4 times per week  
Most days

Country: United Kingdom  
Survey: Health Education Monitoring Survey  
Survey Code: UK 02  
Year: 1998  
Type: Face to Face

---

Question 103

I'd like you to think about physical activities you have done when you were not doing your paid job.  
Have you done any housework in the past 4 weeks?

Yes  
No

Have you done any hoovering, dusting or ironing in the past 4 weeks?

Yes  
No

---

Question 104

Some kinds of housework are heavier than others.  
This card gives examples of heavy housework, it does not include everything, these are just examples. Was any of the housework you did in the past 4 weeks this kind of heavy housework?

SHOW CARD Y

Yes  
No

During the past 4 weeks on how many separate days have you done that kind of heavy housework?

---

Question 105

Have you done any gardening, did you or building in the past 4 weeks?

Yes  
No

Have you done any gardening, did you or building work

listed on this card?

SHOW CARD Z

Yes

No

Have you done any gardening, did you or building work from this card, or any similar heavy manual work?

SHOW CARD AA

Yes

No

During the past 4 weeks, on how many days have you done this kind of heavy manual gardening or did you?

Country: United Kingdom  
Survey: Health Survey for England  
Survey Code: UK 09  
Year: 1998  
Type: Face to Face + self administered

---

Question 133

In the last week have you done any housework or gardening which involved pulling or pushing, like Hoovering, cleaning a car, mowing grass or sweeping up leaves for at least 15 minutes a time?

Yes  
No

---

Question 134

On how many days in the last week have you done any housework or gardening of this type for at least 15 minutes a time?

One day  
Two days  
Three days  
Four days  
Five days  
Six days  
Every day

---

Question 135

On each day that you did any housework or gardening of this type for at least 15 minutes a time, how long did you spend?

Show card G

15 minutes, less than 30 minutes  
30 minutes, less than 1 hour  
1 hour, less than 1½ hours  
1½ hours, less than 2 hours  
2 hours, less than 2½ hours  
2½ hours, less than 3 hours  
3 hours, less than 3½ hours  
3½ hours, less than 4 hours

---

4 hours or more

Question 136

How long did you spend doing housework or gardening on each day?

... hours ... minutes

---

Question 166

I'd like you to think about the physical activities you have done in the last few weeks (when you were not doing your paid job.)

Have you done any housework in the past four weeks, that is from (date four weeks ago) up to yesterday?

Yes  
No

---

Question 167

Have you done any housework listed on this card?

Show card K

Yes  
No

---

Question 168

Some kinds of housework are heavier than others. This card gives some examples of heavy housework. It does not include everything, these are just examples. Was any of the housework you did in the last four weeks this kind of heavy housework?

Show card L

Yes  
No

---

Question 169

During the past four weeks on how many days have you done this kind of heavy housework?

... days



---

Question 170

On the days you did heavy housework, how long did you usually spend?

... hours ... minutes

---

Question 171

Have you done any gardening, do it yourself or building work in the past four weeks, that is since (date four weeks ago)?

Yes  
No

---

Question 172

Have you done any gardening, do it yourself or building work listed on this card?

Show card M

Yes  
No

---

Question 173

Have you done any gardening, do it yourself or building work from this other card, or any similar heavy manual work?

Show card N

Yes  
No

---

Question 174

During the past 4 weeks on how many days have you done this kind of heavy manual gardening or do it yourself?

... days

---

Question 175

On the days you did heavy manual gardening or do it yourself, how long did you usually spend?

Country: United Kingdom  
Survey: The scottish health survey  
Survey Code: UK 13  
Year: 1998  
Type: Face to Face

---

Question 178

I'd like you to think about the physical activities you have done in the last few weeks (when you were not doing your paid job.) Have you done any housework in the past four weeks, that is from (date four weeks ago) up to yesterday?

Yes  
No

Have you done any housework listed on this card?

SHOW CARD F

Yes  
No

Some kinds of housework are heavier than others. This card gives some examples of heavy housework. It does not include everything, these are just examples. Was any of the housework you did in the last four weeks this kind of heavy housework?

SHOW CARD G

Yes  
No

During the past four weeks on how many days have you done this kind of heavy housework?

...

On the days you did heavy housework, how long did you usually spend?

...

RECORD MINUTES SPENT ON HEAVY HOUSEWORK.

...

---

Question 179

Have you done any gardening, DIY or building work in the past four weeks, that is since (date four weeks ago)?

Yes  
No

Have you done any gardening, DIY or building work listed on this card?

SHOW CARD H

Yes  
No

Have you done any gardening, DIY or building work from this other card, or any similar heavy manual work?

SHOW CARD I

Yes  
No

During the past 4 weeks on how many days have you done this kind of heavy manual gardening or DIY?

...

On the days you did heavy manual gardening or DIY, how long did you usually spend?

...

RECORD MINUTES SPENT ON GARDENING OR DIY.

---

Question 184

In the last week have you done any housework or gardening which involved pulling or pushing, like hoovering, cleaning a car, mowing grass or sweeping up leaves for at least 15 minutes a time?

Yes  
No

On how many days in the last week have you done any housework or gardening of this type for at least 15 minutes a time?

One day  
Two days  
Three days  
Four days  
Five days  
Six days

Every day

On each day that you did any housework or gardening of this type for at least 15 minutes a time, how long did you spend?

Please give an answer from this card.

SHOW CARD K

15 minutes, less than 30 minutes

30 minutes, less than 1 hour

1 hour, less than 1½ hours

1½ hours, less than 2 hours

2 hours, less than 2½ hours

2½ hours, less than 3 hours

3 hours, less than 3½ hours

3½ hours, less than 4 hours

4 hours or more, please specify how long: ... hours  
... minutes

How long did you spend doing housework or gardening on each day?

...

Country: Italy  
Survey: Health Conditions and the Use of Health Services  
Survey Code: IT 01  
Year: 1999  
Type: Face to Face

---

Question 15.7

Can your domestic work mainly be considered a physical activity?

Light  
Moderate  
Heavy, till perspiring

Country: International  
Survey: European Physical Activity Surveillance System (EUPASS)  
Survey Code:  
Year: 2000  
Type: Telephone

---

Question B5c

How much physical activity did you do in and around your home including housework, gardening, general maintenance, or caring for your family in the last 7 days?

Much  
Moderate  
Little or no

Country: Italy  
Survey: Aspects of daily living  
Survey Code: IT 03  
Year: 2000  
Type: Face to Face

---

Question 4.2

Is your domestic and extradomestic work mainly characterised by scarce, moderate or heavy physical activity? (one answer for each line)

Scarce  
Moderate  
Heavy

Family or housework  
Working activity



Country: Romania  
Survey: Health Interview Survey  
Survey Code: RO 01  
Year: 2000  
Type: Face to Face

---

Question 112

How would you describe the physical effort involved by your domestic activities?

Small  
Average  
Intense

Country: Italy  
Survey: Aspects of daily living  
Survey Code: IT 04  
Year: 2001  
Type: Face to Face

---

Question 5.2

Is your domestic and extradomestic work mainly characterised by scarce, moderate or heavy physical activity? (one answer for each line)

Scarce  
Moderate  
Heavy

Family or housework  
Working activity

Country: Netherlands

Survey: Patient survey - Second Dutch National Survey of General Practice

Survey Code: NL 02

Year: 2001

Type: Face to Face

---

Question LRV44s1

And how many days a week do you do more strenuous household chores such as scrubbing floors, carrying heavy shopping, etc?

---

Question LRV44s2

And how much time on average per day in hours and minutes do you spend on this?

Number of hours: ...

---

Question LRV44s3

Number of minutes: ...

---

Country: Netherlands  
Survey: Continuous Quality of Life Survey  
Survey Code: NL 03  
Year: 2001  
Type: Self administered

---

Question 367

Domestic activities

light and moderately strenuous domestic work (standing work like cooking, dishwashing, ironing, feeding / bathing children and running work like hoovering, shopping)

heavy domestic work (scrubbing, beating out the rugs, walking with heavy shopping bags)

number of days per week

Days:...

average time per day

hours: ... min: ...

Country: Switzerland  
Survey: Swiss Health Survey 2002  
Survey Code: CH 02  
Year: 2002  
Type: Telephone

---

Question 44.02

And in your work, whether a professional activity, household chores or gardening, how many days a week do you perspire (on average)?

... days a week (between 0 and 7 days)  
no reply

Country: Italy  
Survey: Aspects of daily living  
Survey Code: IT 05  
Year: 2002  
Type: Face to Face

---

Question 5.2

Is your domestic and extradomestic work mainly characterised by scarce, moderate or heavy physical activity? (one answer for each line)

Scarce  
Moderate  
Heavy

Family or housework  
Working activity

Country: Malta  
Survey: First National Health Interview Survey  
Survey Code: MT 01  
Year: 2002  
Type: Face to Face

---

Question 63

HOUSEHOLD ACTIVITIES

Do you do light household work (e.g. dusting, washing dishes, changing light bulbs/plugs)?

Most days  
3-4 times per week  
Once per week  
1-3 times per month  
Seldom/never

---

Question 64

Do you do heavy household work (e.g. washing floors and windows, vacuuming/hooking, plastering/whitewashing)?

Most days  
2-3 times per week  
Once per week  
1-3 times per month  
Seldom/never

Country: Netherlands  
Survey: Continuous Quality of Life Survey  
Survey Code: NL 05  
Year: 2002  
Type: Self administered

---

Question 367

Domestic activities

light and moderately strenuous domestic work (standing work like cooking, dishwashing, ironing, feeding / bathing children and running work like hoovering, shopping)

heavy domestic work (scrubbing, beating out the rugs, walking with heavy shopping bags)

number of days per week

Days:...

average time per day

hours: ... min: ...



Country: United Kingdom  
Survey: Health Survey for England  
Survey Code: UK 28  
Year: 2002  
Type: Face to Face

---

Question 150

In the last week have you/has (name of child) done any housework or gardening which involved pulling or pushing, like hoovering, cleaning a car, mowing grass or sweeping up leaves for at least 15 minutes a time?

Yes  
No

---

Question 151

On how many days in the last week have you/has (name of child) done any housework or gardening of this type for at least 15 minutes a time?

One day  
Two days  
Three days  
Four days  
Five days  
Six days  
Every day

---

Question 152

On each day that you/(name of child) did any housework or gardening of this type for at least 15 minutes a time, how long did you/s/he spend?

Please give an answer from this card.

15 minutes, less than 30 minutes  
30 minutes, less than 1 hour  
1 hour, less than 1 1/2 hours  
1 1/2 hours, less than 2 hours  
2 hours, less than 2 1/2 hours  
2 1/2 hours, less than 3 hours  
3 hours, less than 3 1/2 hours  
3 1/2 hours, less than 4 hours  
4 hours or more, please specify how long: How long did you/(name of child) spend doing housework or gardening on each day?

hours :... minutes: ....

---

Question 167a

Have you done any housework when you were not doing your paid job/in the past four weeks, that is from (date four weeks ago) up to yesterday?

Yes  
No

---

Question 167b

IF Yes, have you done any housework listed on this card?

Yes  
No

---

Question 168a

Some kinds of housework are heavier than others. This card gives some examples of heavy housework. It does not include everything, these are just examples. Was any of the housework you did in the last four weeks this kind of heavy housework?"

Yes  
No

---

Question168b

IF Yes , during the past four weeks on how many days have you done this kind of heavy housework for at least 30 minutes a time?

... days

---

Question 169a

Have you done any gardening, Do It Yourself or building work in the past four weeks, that is since (date four weeks ago)?

Yes  
No

---

Question 169b

IF Yes, Have you done any gardening, Do It Yourself or building work listed on this card?

Yes  
No

---

Question 170a

Have you done any gardening, Do It Yourself or building work from this other card, or any similar heavy manual work?

- Yes
  - No
- 

Question 170b

IF Yes, during the past four weeks on how many days have you done this kind of heavy manual gardening or Do It Yourself, for at least 30 minutes a time?

... days

Country: Netherlands  
Survey: Continuous Quality of Life Survey  
Survey Code: NL 08  
Year: 2003  
Type: Self administered

---

Question 367

Domestic activities

light and moderately strenuous domestic work (standing work like cooking, dishwashing, ironing, feeding / bathing children and running work like hoovering, shopping)

heavy domestic work (scrubbing, beating out the rugs, walking with heavy shopping bags)

number of days per week

Days:...

average time per day

hours: ... min: ...

Country: Netherlands  
Survey: Continuous Quality of Life Survey  
Survey Code: NL 07  
Year: 2004  
Type: Self administered

---

Question 344

Domestic activities

light and moderately strenuous domestic work (standing work like cooking, dishwashing, ironing, feeding/bathing children and running work like Hoovering, shopping)

heavy domestic work (scrubbing, beating out the rugs, walking with heavy shopping bags)

number of days per week

Days:...

average time per day

hours: ... min: ...

Country: Italy  
Survey: Health Conditions and the Use of Health Services 2004-2005  
Survey Code: IT 08  
Year: 2005  
Type: Face to Face

---

Question 17.2

How many hours and minutes per week, on average, do you devote to domestic and family-oriented work (housework, shopping, care of other family members)?

Do not carry out activities

N° hours: ...

N° minutes: ...

---

Question 17.3

Is your domestic and family-oriented work mainly characterised by physical activity?

Yes, light

Yes, moderate

Yes, heavy, till perspiring

Country: United Kingdom  
Survey: Health Survey for England  
Survey Code: UK 31  
Year: 2005  
Type: Face to Face

---

Question HWkCh

In the last week have you/has (name of child) done any housework or gardening which involved pulling or pushing, like hoovering, cleaning a car, mowing grass or sweeping up leaves for at least 15 minutes a time?

Yes  
No

---

Question DHWkCh

On how many days in the last week have you/has (name of child) done any housework or gardening of this type for at least 15 minutes a time?

One day  
Two days  
Three days  
Four days  
Five days  
Six days  
Every day

---

Question THWk

On each day that you/(name of child) did any housework or gardening of this type for at least 15 minutes a time, how long did you/s/he spend?  
Please give an answer from this card.

15 minutes, less than 30 minutes  
30 minutes, less than 1 hour  
1 hour, less than 1 1/2 hours  
1 1/2 hours, less than 2 hours  
2 hours, less than 2 1/2 hours  
2 1/2 hours, less than 3 hours  
3 hours, less than 3 1/2 hours  
3 1/2 hours, less than 4 hours  
4 hours or more (please specify how long)

---

Question HWkHrs

How long did you/(name of child) spend doing housework or gardening on each day?

...



Country: United Kingdom  
Survey: Health Survey for England  
Survey Code: UK 33  
Year: 2006  
Type: Face to Face

---

Question HWkCh

In the last week have you/has (name of child) done any housework or gardening which involved pulling or pushing, like hoovering, cleaning a car, mowing grass or sweeping up leaves for at least 15 minutes a time?

Yes  
No

---

Question DHWkCh

On how many days in the last week have you/has (name of child) done any housework or gardening of this type for at least 15 minutes a time?

One day  
Two days  
Three days  
Four days  
Five days  
Six days  
Every day

---

Question THWk

On each day that you/(name of child) did any housework or gardening of this type for at least 15 minutes a time, how long did you/s/he spend?

15 minutes, less than 30 minutes  
30 minutes, less than 1 hour  
1 hour, less than 1 1/2 hours  
1 1/2 hours, less than 2 hours  
2 hours, less than 2 1/2 hours  
2 1/2 hours, less than 3 hours  
3 hours, less than 3 1/2 hours  
3 1/2 hours, less than 4 hours  
4 hours or more, please specify how long: ...

---

Question HWkHrs

How long did you/(name of child) spend doing housework or gardening on each day?

RECORD HOURS SPENT BELOW

...

RECORD HERE MINUTES SPENT WALKING.

...

---

Question HevyHWrk-HvH

Some kinds of housework are heavier than others. This card gives some examples of heavy housework. It does not include everything, these are just examples. Was any of the housework you did in the last four weeks this kind of heavy housework?

Yes

No

During the past four weeks on how many days have you done this kind of heavy housework for at least 30 minutes a time?

...

---

Question HeavyDay

During the past four weeks on how many days have you done this kind of heavy housework?

...

---

Question HrsHHW

On the days you did heavy housework, how long did you usually spend?

...

---

Question Garden

Have you done any gardening, DIY or building work in the past four weeks, that is since (date four weeks ago)?

Yes

No

Have you done any gardening, DIY or building work listed on this card?

Yes  
No

---

Question ManWork

Have you done any gardening, DIY or building work from this other card, or any similar heavy manual work?

Yes  
No

During the past four weeks on how many days have you done this kind of heavy manual gardening or DIY, for at least 30 minutes a time?

...

---

Question ManDays

During the past four weeks on how many days have you done this kind of heavy manual gardening or DIY?

...

---

Question HrsDIY

On the days you did heavy manual gardening or DIY, how long did you usually spend?

...

Record minutes spent on gardening or DIY

...

Country: Switzerland  
Survey: Swiss Health Survey  
Survey Code: CH 03  
Year: 2007  
Type: Telephone + self administered

---

Question 46.02

And how many days per week do you work up a sweat (on average) while working, either in your job or working at home or in the garden?

... days per week (0 to 7 days)  
No answer

Country: Sweden  
Survey: Swedish Level of Living Survey  
Survey Code:  
Year: 2007  
Type: Face to Face

---

Question 240a

About how many hours per week on average are spent altogether in your household on buying groceries, cooking and washing dishes?

HOURS PER WEEK

*If respondent lives alone: Question 241 a*

---

Question 240b

About how many of these hours do you do this work yourself?

HOURS PER WEEK

---

Question 241a

About how many hours per week on average are spent altogether in your household on laundry, ironing and other care of clothing?

HOURS PER WEEK

*If respondent lives alone: Question 242 a*

---

Question 241b

About how many of these hours do you do this work yourself?

HOURS PER WEEK

---

Question 242a

About how many hours per week on average are spent altogether in your household on cleaning?

HOURS PER WEEK

*If respondent lives alone: Question 243 a*

---

Question 242b

About how many of these hours do you do this work yourself?  
HOURS PER WEEK

---

Question 243a

On average, about how many hours per week are spent altogether on repair and maintenance of your residence, motor vehicle and other property belonging to your household?

HOURS PER WEEK

*If respondent lives alone: Question 244*

---

Question 243b

About how many of these hours do you do this work yourself?

HOURS PER WEEK

Country: United Kingdom  
Survey: Health Survey for England  
Survey Code: UK 35  
Year: 2007  
Type: Face to Face + self administered

---

Question HWkCh

In the last week have you/has (name of child) done any housework or gardening which involved pulling or pushing, like hoovering, cleaning a car, mowing grass or sweeping up leaves for at least 15 minutes a time?

Yes  
No

---

Question DHWkCh

On how many days in the last week have you/has (name of child) done any housework or gardening of this type for at least 15 minutes a time?

One day  
Two days  
Three days  
Four days  
Five days  
Six days  
Every day

---

Question THWk

On each day that you/(name of child) did any housework or gardening of this type for at least 15 minutes a time, how long did you/s/he spend?

15 minutes, less than 30 minutes  
30 minutes, less than 1 hour  
1 hour, less than 1 1/2 hours  
1 1/2 hours, less than 2 hours  
2 hours, less than 2 1/2 hours  
2 1/2 hours, less than 3 hours  
3 hours, less than 3 1/2 hours  
3 1/2 hours, less than 4 hours  
4 hours or more, please specify how long: ...

---

Question HWkHrs

How long did you/(name of child) spend doing housework or gardening on each day?

RECORD HOURS SPENT BELOW

...

RECORD HERE MINUTES SPENT WALKING.

...



Country: France  
Survey: Disabilities and health survey, household part 2008  
Survey Code: FR 20  
Year: 2008  
Type: Face to Face

---

Question MBRIJAR

In the past 12 months have you done any D.I.Y. or gardening? (apart from very small jobs or repairs)

Yes  
No  
Doesn't know

Was this:

Regularly throughout the year  
Occasionally throughout the year  
Only at certain periods or during holidays  
Occasionally or rarely  
Doesn't know

Country: United Kingdom  
Survey: Health Survey for England  
Survey Code: UK 36  
Year: 2008  
Type: Face to Face

---

Question HWkCh

In the last week have you/has (name of child) done any housework or gardening which involved pulling or pushing, like hoovering, cleaning a car, mowing grass or sweeping up leaves for at least 15 minutes a time?

Yes  
No

---

Question DHWkCh

On how many days in the last week have you/has (name of child) done any housework or gardening of this type for at least 15 minutes a time?

One day  
Two days  
Three days  
Four days  
Five days  
Six days  
Every day

---

Question THWk

On each day that you/(name of child) did any housework or gardening of this type for at least 15 minutes a time, how long did you/s/he spend?

15 minutes, less than 30 minutes  
30 minutes, less than 1 hour  
1 hour, less than 1 1/2 hours  
1 1/2 hours, less than 2 hours  
2 hours, less than 2 1/2 hours  
2 1/2 hours, less than 3 hours  
3 hours, less than 3 1/2 hours  
3 1/2 hours, less than 4 hours  
4 hours or more, please specify how long: ...

---

Question HWkHrs

How long did you/(name of child) spend doing housework or gardening on each day?

RECORD HOURS SPENT BELOW

...

RECORD HERE MINUTES SPENT WALKING.

...

International Survey Items concerning

**Transport-related Physical Activity**

1997 - 2007

## TABLE OF CONTENTS

### 1997

|                 |   |
|-----------------|---|
| Finland – FI 02 | 2 |
|-----------------|---|

### 2000

|                        |   |
|------------------------|---|
| Canada – CA 01         | 3 |
| Finland – FI 01        | 4 |
| Finland – FI 03        | 5 |
| International – EUPASS | 6 |

### 2001

|                     |    |
|---------------------|----|
| Finland – FI 06     | 7  |
| Netherlands – NL 02 | 8  |
| Netherlands – NL 03 | 10 |

### 2002

|                        |    |
|------------------------|----|
| Estonia – EE 04        | 11 |
| Finland – FI 07        | 12 |
| Finland – FI 13        | 13 |
| International – INT 08 | 14 |
| Slovakia – SK 02       | 15 |

### 2003

|                        |    |
|------------------------|----|
| Canada – CA 02         | 16 |
| Finland – FI 10        | 17 |
| Croatia – HR 04        | 18 |
| International – INT 12 | 19 |

### 2004

|                         |    |
|-------------------------|----|
| Estonia – EE 07         | 20 |
| Finland – FI 12         | 21 |
| International – FINBALT | 22 |

### 2005

|                 |    |
|-----------------|----|
| Canada – CA 03  | 23 |
| Denmark – DK 03 | 24 |
| Finland – FI 19 | 25 |

### 2006

|                   |    |
|-------------------|----|
| Lithuania – LT 05 | 26 |
|-------------------|----|

### 2007

|                     |    |
|---------------------|----|
| Australia – AU 04   | 27 |
| Canada – CA 04      | 28 |
| Canada – CA 05      | 29 |
| Switzerland – CH 03 | 30 |
| Finland – FI 21     | 31 |
| Finland – FI 22     | 32 |

Country: Finland  
Survey: FINRISK 97  
Survey Code: FI 02  
Year: 1997  
Type: Face to Face + self administered

---

Question 69

How many minutes do you walk, ride on a bicycle or otherwise exercise to get to work?

(Please count in both travelling to and from work.)

I am not at work or I use only a motorised vehicle  
under 15 minutes daily  
15 - 29 minutes daily  
30 - 44 minutes daily  
45 - 59 minutes daily  
over an hour daily

Country: Canada  
Survey: Canadian Community Health Survey Cycle 1.1  
Survey Code: CA 01  
Year: 2000  
Type: Face to Face

---

Question PA4B

In a typical week, how much time did you usually spend bicycling to work or to school or while doing errands?

- None
- Less than 1 hour
- From 1 to 5 hours
- From 6 to 10 hours
- From 11 to 20 hours
- More than 20 hours

Country: Finland  
Survey: Survey on health behaviour  
Survey Code: FI 01  
Year: 2000  
Type: Self administered

---

Question 88

How many minutes do you walk or bicycle on your way to and from work? Please indicate the total time.

- I do not work or I work at home
- I always travel to and from work by motor vehicle
- less than 15 minutes a day
- 15 - 30 minutes a day
- 30 - 60 minutes a day
- over one hour a day



Country: Finland  
Survey: Health 2000  
Survey Code: FI 03  
Year: 2000  
Type: Self administered

---

Question 37

How many minutes do you walk or cycle on your daily way to and from work?  
Add the times to travel to work and to travel back home.

I do not work or I work at home  
I use a motor vehicle for the entire trip  
less than 15 minutes a day  
from 15 to 29 minutes a day  
from 30 to 59 minutes a day  
from 1 to 2 hours a day  
2 hours or longer a day

Country: International  
Survey: European Physical Activity Surveillance System (EUPASS)  
Survey Code:  
Year: 2000  
Type: Telephone

---

Question B5b

How much physical activity did you do for the purpose of transportation in the last 7 days?

Much  
Moderate  
Little or no

Country: Finland  
Survey: Health Behaviour among the Finnish Adult Population  
Survey Code: FI 06  
Year: 2001  
Type: Face to Face

---

Question 78

How many minutes do you walk or bicycle on your way to and from work? Please indicate the total time.

- I do not work or I work at home
- I always travel to and from work by motor vehicle
- less than 15 minutes a day
- 15 – 30 minutes a day
- 30 – 60 minutes a day
- over one hour a day

Country: Netherlands  
Survey: Patient survey - Second Dutch National Survey of General Practice  
Survey Code: NL 02  
Year: 2001  
Type: Face to Face

---

Question LRV44a1

We will now continue by looking at your normal day-to-day activities.

Would you keep in mind a normal week during the past few months? I am going to give a number of activities and then ask you a couple of questions per activity.

We will begin with going to and from work or school.

Walking to/from work or school. How many days a week do you do that?

...

---

Question LRV44a2

What is the average walking time per day in hours and minutes?

Number of hours: ...

---

Question LRV44a3

Number of minutes: ...

---

Question LRV44b1

And cycling to/from work or school.  
How many days a week do you do that?

...

---

Question LRV44b2

What is the average cycling time per day in hours and minutes?

Number of hours: ...

---

Question LRV44b3

Number of minutes: ...

Country: Netherlands  
Survey: Continuous Quality of Life Survey  
Survey Code: NL 03  
Year: 2001  
Type: Self administered

---

Question 365

Imagine a normal week during the past months.  
Could you indicate how many days per week you performed  
the activities mentioned below, how much time you spent on  
them on an average day and how strenuous these activities  
were?

walking to/from work or school  
number of days per week  
... Days  
average time per day  
... hours ... min.

cycling to /from work or school  
number of days per week  
... Days  
average time per day  
... hours ... min..

not applicable

effort

Slow  
average  
fast

Country: Estonia  
Survey: Health Behaviour among Estonian Adult Population  
Survey Code: EE 04  
Year: 2002  
Type: Face to Face

---

Question 65

How many minutes a day do you spend walking or riding a bicycle to and from work? (Combine time spent both ways).

- I am not working at all or I work at home
- I go to work by car
- Less than 15 minutes a day
- 15-30 min. a day
- 30-60 min. a day
- More than an hour a day

Country: Finland  
Survey: FINRISK 2002  
Survey Code: FI 07  
Year: 2002  
Type: Self administered

---

Question 75

How many minutes do you walk, ride on a bicycle or otherwise exercise to get to work?  
(Please count in both travelling to and from work.)

I do not work or I use only a motorised vehicle  
less than 15 minutes daily  
15 - 29 minutes daily  
30 - 44 minutes daily  
45 - 59 minutes daily  
over an hour daily



Country: Finland  
Survey: Health Behaviour among the Finnish Adult Population  
Survey Code: FI 13  
Year: 2002  
Type: Face to Face

---

Question 80

How many minutes do you walk or bicycle on your way to and from work?  
Please indicate the total time.

I do not work or I work at home  
I always travel to and from work by motor vehicle  
less than 15 minutes a day  
15 – 30 minutes a day  
30 – 60 minutes a day  
over one hour a day

Country: International  
Survey: World Health Surveys-WHS-Consolidated multi-country questionnaire  
Survey Code: INT 08  
Year: 2002  
Type: Face to Face

---

Question 4404b

During the last 7 days, on how many days did you walk or use a bicycle for travel for at least 10 minutes continuously?

Days per week

---

Question 4404c

On a typical day that you walked or used a bicycle for travel, how much time did you spend doing this?

Hours/minutes

Country: Slovakia  
Survey: Health Monitor Survey  
Survey Code: SK 02  
Year: 2002  
Type: Face to Face

---

Question 6.11

How many minutes a day do you spend walking or riding a bicycle to and from work?

(Combine time spent both ways).

I do not work at all or I work at home  
I go to work by car  
less than 15 minutes a day  
15-30 minutes a day  
30-60 minutes a day  
more than one hour a day

Country: Canada  
Survey: Canadian Community Health Survey Cycle 2.1  
Survey Code: CA 02  
Year: 2003  
Type: Face to Face + Telephone

---

Question PAC\_Q4A

In a typical week in the past 3 months, how many hours did you usually spend walking to work or to school or while doing errands?

- None
  - Less than 1 hour
  - From 1 to 5 hours
  - From 6 to 10 hours
  - From 11 to 20 hours
  - More than 20 hours
- 

Question PAC\_Q4B

In a typical week, how much time did you usually spend bicycling to work or to school or while doing errands?

- None
- Less than 1 hour
- From 1 to 5 hours
- From 6 to 10 hours
- From 11 to 20 hours
- More than 20 hours

Country: Finland  
Survey: Health Behaviour among the Finnish Adult Population  
Survey Code: FI 10  
Year: 2003  
Type: Face to Face

---

Question 83

How many minutes do you walk or bicycle on your way to and from work?  
Please indicate the total time.

I do not work or I work at home  
I always travel to and from work by motor vehicle  
less than 15 minutes a day  
15 – 30 minutes a day  
30 – 60 minutes a day  
over one hour a day

Country: Croatia  
Survey: Croatian Health Survey  
Survey Code: HR 04  
Year: 2003  
Type: Face to Face

---

Question PHA 01

In part of this questionnaire we examine your physical activity

How many minutes a day do you spend walking or riding bicycle to and from work? (combine time spent both ways)

- Does not work at all or works at home
- Goes to work by car, public transportation or similar
- Walks (ride a bike) less than 15 minutes a day
- Walks (ride a bike) between 15 to 30 minutes a day
- Walks (ride a bike) for more than 30 minutes a day

Country: International  
Survey: Joint Canada/United States Survey of Health (JCUSH)  
Survey Code: INT 12  
Year: 2003  
Type: Telephone

---

Question PAC\_Q04A

Next, some questions about the amount of time you spent in the past 3 months on physical activity at work or while doing daily chores around the house, but not leisure time activity.

In a typical week in the past 3 months, how many hours did you usually spend walking to work or to school or while doing errands?

- None
  - Less than 1 hour
  - From 1 to 5 hours
  - From 6 to 10 hours
  - From 11 to 20 hours
  - More than 20 hours
- 

Question PAC\_Q04B

In a typical week, how much time did you usually spend bicycling to work or to school or while doing errands?

- None
- Less than 1 hour
- From 1 to 5 hours
- From 6 to 10 hours
- From 11 to 20 hours
- More than 20 hours

Country: Estonia  
Survey: Health behaviour among Estonian Adult Population  
Survey Code: EE 07  
Year: 2004  
Type: Self administered

---

Question 71

How many minutes a day altogether do you spend walking or riding a bicycle to and from work?

- less than 15 minutes a day
- 15–30 minutes a day
- 30–60 minutes a day
- more than 60 minutes a day
- I go to work by car/public transport
- I am not working at all or I work at home



Country: Finland  
Survey: Health Behaviour among the Finnish Adult Population  
Survey Code: FI 12  
Year: 2004  
Type: Face to Face

---

Question 73

How many minutes do you walk or bicycle on your way to and from work?  
Please indicate the total time.

I do not work or I work at home  
I always travel to and from work by motor vehicle  
less than 15 minutes a day  
15 – 30 minutes a day  
30 – 60 minutes a day  
over one hour a day

Country: International (Finland, Baltic States)  
Survey: FINBALT Health Monitor  
Survey Code:  
Year: 2004  
Type: Self administered

---

Question 55

How many minutes a day do you spend walking or riding a bicycle to and from work?  
(Combine time spent both ways).

- 1 I am not working at all or I work at home
- 2 I go to work by car
- 3 less than 15 minutes a day
- 4 15-30 min. a day
- 5 30-60 min. a day
- 6 more than an hour a day

Country: Canada  
Survey: National Population Health Survey (NPHS)  
Survey Code: CA 03  
Year: 2005  
Type: Face to Face + Telephone

---

Question PA\_Q4A

Next, some questions about the amount of time you spent in the past 3 months on physical activity at work or while doing daily chores around the house, but not leisure time activity.

In a typical week in the past 3 months, how many hours did you usually spend walking to work or to school or while doing errands?

- None
  - Less than 1 hour
  - From 1 to 5 hours
  - From 6 to 10 hours
  - From 11 to 20 hours
  - More than 20 hours
- 

Question PA\_Q4B

In a typical week, how much time did you usually spend bicycling to work or to school or while doing errands?

- None
- Less than 1 hour
- From 1 to 5 hours
- From 6 to 10 hours
- From 11 to 20 hours
- More than 20 hours

Country: Denmark  
Survey: The Danish Health Interview Survey  
Survey Code: DK 03  
Year: 2005  
Type: Face to Face

---

Question 75

How much of your daily transport time are you walking or cycling?  
Transport time means time used for commuting to work or school or other education. First I will ask you to answer about summertime and then wintertime.  
(This also includes running, roller-skating, skateboarding, etc. if it is part of daily transport.)

Summer  
Winter

0–14 minutes  
15–29 minutes  
30–59 minutes  
1 hour or more

Country: Finland  
Survey: Health Behaviour among the Finnish Adult Population  
Survey Code: FI 19  
Year: 2005  
Type: Self administered

---

Question 78

How many minutes do you walk or bicycle on your way to and from work?  
Please indicate the total time.

I do not work or I work at home  
I always travel to and from work by motor vehicle  
less than 15 minutes a day  
15 – 30 minutes a day  
30 – 60 minutes a day  
over one hour a day

Country: Lithuania  
Survey: Lithuanian health behaviour monitoring  
Survey Code: LT 05  
Year: 2006  
Type: Self administered

---

Question 73

How many minutes a day do you spend walking or riding a bicycle to and from work? (Combine time spent both ways)

I am not working at all or I work at home  
I go to work by car  
less than 15 minutes a day  
15-30 min. a day  
30-60 min. a day  
more than an hour a day

Country: Australia  
Survey: National Health Survey  
Survey Code: AU 04  
Year: 2007  
Type: Face to Face

---

Question EXER\_Q20

(Excluding walking for fitness, recreation and sport already reported), in the last week, did [you/proxy name] walk for at least 10 minutes continuously to get to and from places?

Yes  
NO

---

Question EXER\_Q21

How many days did [you/proxy name] walk for at least 10 minutes continuously to get to and from places in the last week?

...

---

Question EXER\_Q22

How much time in total did [you/proxy name] spend walking to get to and from places in the last week?

hours: ...  
minutes: ...

Country: Canada  
Survey: Canadian Health Measures Survey  
Survey Code: CA 04  
Year: 2007  
Type: Face to Face

---

Question PAC\_Q21 I

Next, some questions about the amount of time spent in the past 3 months on physical activity at work, while doing daily chores around the house, or doing errands, but not leisure time activity.

In a typical week in the past 3 months, how many hours did you usually spend walking to work or to school or while doing errands?

- None
  - Less than 1 hour
  - From 1 to 5 hours
  - From 6 to 10 hours
  - From 11 to 20 hours
  - More than 20 hours
- 

Question PAC\_Q22

(In a typical week in the past 3 months,) How many hours did you usually spend bicycling to work or to school or while doing errands?

- None
- Less than 1 hour
- From 1 to 5 hours
- From 6 to 10 hours
- From 11 to 20 hours
- More than 20 hours



Country: Canada  
Survey: Canadian Community Health Survey (CCHS)  
Survey Code: CA 05  
Year: 2007  
Type: Face to Face + Telephone

---

Question PAC\_Q7

The last questions were about leisure time activities. Next, some questions about walking and bicycling that you do only as a way of getting to and from work or school.

Other than the (X) times you already reported walking for exercise was there any other time. Was there any time] in the past 3 months when you walked to and from work or school?

Yes  
No  
Does not work or go to school

How many times?

... Times

About how much time did you spend on each occasion?

1 to 15 minutes  
16 to 30 minutes  
31 to 60 minutes  
More than one hour

---

Question PAC\_Q8

Other than the (X) times you already reported bicycling was there any other time. Was there any other time] in the past 3 months when you bicycled to and from work or school?

Yes  
No

How many times?

... Times

About how much time did you spend on each occasion?

1 to 15 minutes  
16 to 30 minutes  
31 to 60 minutes  
More than one hour

Country: Switzerland  
Survey: Swiss Health Survey  
Survey Code: CH 03  
Year: 2007  
Type: Telephone + self administered

---

Question 46.20

As for your daily journeys, for example to work, to go shopping, to go out: do you usually make them ...

- On foot
  - By bicycle
  - By public transport
  - By motor vehicle
  - No answer
- 

Question 46.21

About how many minutes a day do you travel on foot or by bicycle?

- ... hours and ... minutes per day
- Don't know
- No answer

Country: Finland  
Survey: FINRISK 2007  
Survey Code: FI 21  
Year: 2007  
Type: Self administered

---

Question 80

How many minutes do you walk, ride on a bicycle or otherwise exercise to get to work? (Please count in both travelling to and from work.)

I do not work or I use only a motorized vehicle  
less than 15 minutes daily  
15 - 29 minutes daily  
30 - 44 minutes daily  
45 - 59 minutes daily  
over an hour daily

Country: Finland  
Survey: Health Behaviour and Health among the Finnish Adult Population  
Survey Code: FI 22  
Year: 2007  
Type: Self administered

---

Question 73

How many minutes do you walk or bicycle on your way to and from work?

- I do not work or I work at home
- I always travel to and from work by motor vehicle
- less than 15 minutes a day
- 15–30 minutes a day
- 30–60 minutes a day
- over one hour a day

International Survey Items concerning

**Leisure Time Physical Activity**

1992 - 2008

## TABLE OF CONTENTS

|                        |    |
|------------------------|----|
| <b>1992</b>            |    |
| United Kingdom – UK 03 | 4  |
| <b>1994</b>            |    |
| Denmark – DK 01        | 6  |
| Italy – IT 02          | 7  |
| <b>1995</b>            |    |
| Spain – ES 01          | 9  |
| Portugal – PT 01       | 10 |
| United Kingdom – UK 10 | 11 |
| <b>1996</b>            |    |
| Estonia – EE 01        | 20 |
| Iceland – IS 01        | 22 |
| Denmark – REC 01       | 23 |
| <b>1997</b>            |    |
| Austria – AT 04        | 24 |
| Belgium – BE 01        | 25 |
| Switzerland – CH 01    | 26 |
| Finland – FI 02        | 28 |
| <b>1998</b>            |    |
| Germany – DE 02        | 30 |
| Germany – DE 05        | 32 |
| Ireland – IE 01        | 33 |
| Norway – NO 01         | 34 |
| United Kingdom – UK 02 | 35 |
| United Kingdom – UK 09 | 37 |
| United Kingdom – UK 13 | 44 |
| <b>1999</b>            |    |
| Austria – AT 01        | 50 |
| Spain – ES 04          | 51 |
| France – FR 06         | 52 |
| Italy – IT 01          | 56 |
| <b>2000</b>            |    |
| Canada – CA 01         | 58 |
| Cyprus – CY 02         | 59 |
| Finland – FI 01        | 60 |
| Finland – FI 03        | 61 |
| France – FR 07         | 62 |
| International – EUPASS | 63 |
| Italy – IT 03          | 63 |
| Romania – RO 01        | 65 |
| United Kingdom – UK 12 | 66 |
| United States – US 01  | 68 |
| <b>2001</b>            |    |
| Australia – AU 01      | 69 |
| Finland – FI 06        | 70 |
| France – FR 11         | 71 |
| Iceland – IS 03        | 72 |
| Italy – IT 04          | 73 |
| Netherlands – NL 02    | 74 |
| Slovenia – SI 02       | 76 |
| <b>2002</b>            |    |
| Switzerland – CH 02    | 77 |
| Czech Republic – CZ 01 | 78 |
| Finland – FI 07        | 80 |
| Finland – FI 13        | 82 |
| Ireland – IE 03        | 83 |
| Italy – IT 05          | 84 |

|                         |     |
|-------------------------|-----|
| Norway – NO 02          | 85  |
| Norway – NO 03          | 86  |
| Slovakia – SK 02        | 87  |
| United Kingdom – UK 07  | 88  |
| United Kingdom – UK 28  | 91  |
| <b>2003</b>             |     |
| Canada – CA 02          | 97  |
| Cyprus – CY 01          | 102 |
| Spain – ES 03           | 103 |
| Finland – FI 10         | 104 |
| Croatia – HR 04         | 105 |
| International – INT 12  | 106 |
| Italy – IT 07           | 108 |
| Sweden – SE 03          | 109 |
| <b>2004</b>             |     |
| Australia – AU 03       | 110 |
| Estonia – EE 07         | 113 |
| Finland – FI 12         | 114 |
| Greece – GR 05          | 115 |
| International – FINBALT | 116 |
| Poland – PL 06          | 117 |
| Sweden – SE 04          | 118 |
| United States – US 02   | 119 |
| <b>2005</b>             |     |
| Canada – CA 03          | 122 |
| Germany – DE 07         | 124 |
| Denmark – DK 03         | 125 |
| Finland – FI 19         | 126 |
| Italy – IT 08           | 127 |
| Italy – IT 09           | 128 |
| Netherlands – NL 09     | 129 |
| Sweden – SE 05          | 130 |
| Sweden – SE 07          | 131 |
| United Kingdom – UK 31  | 130 |
| <b>2006</b>             |     |
| Austria – AT 06         | 137 |
| Serbia – CS 01          | 138 |
| Germany – DE 08         | 140 |
| Estonia – EE 08         | 141 |
| Spain – ES 06           | 143 |
| France – FR 18          | 144 |
| Italy – IT 10           | 145 |
| Lithuania – LT 05       | 146 |
| Netherlands – NL 10     | 147 |
| United Kingdom – UK 33  | 149 |
| United States – US 04   | 155 |
| <b>2007</b>             |     |
| Australia – AU 04       | 158 |
| Canada – CA 04          | 160 |
| Canada – CA 05          | 163 |
| Switzerland – CH 03     | 167 |
| Finland – FI 21         | 169 |
| Finland – FI 22         | 171 |
| Ireland – IE 09         | 172 |
| Italy – IT 11           | 173 |
| Luxembourg – LU 04      | 175 |
| Netherlands – NL 11     | 175 |
| Sweden – SE 08          | 176 |
| Sweden – SE 09          | 177 |
| United Kingdom – UK 35  | 178 |
| <b>2008</b>             |     |
| Belgium – BE 06         | 181 |
| France – FR 20          | 182 |
| Romania – RO 02         | 183 |
| United Kingdom – UK 36  | 185 |

Country: United Kingdom  
Survey: Health and Lifestyle Survey  
Survey Code: UK 03  
Year: 1992  
Type: Face to Face

---

Question 85

a. In the last 7 days, have you done any gardening?

Yes  
No

b. How much time, overall, did you spend gardening in the last 7 days?

... time  
Don't know

c. Would you describe any of the gardening as heavy?

Yes  
No

---

Question 86

a. In the last 7 days, have you done any 'do it yourself' I mean house and car maintenance, building, carpentry, etc.?

Yes  
No

b. How much time, overall, did you spend on 'do it yourself' in the last 7 days?

... time  
Don't know

c. Would you describe any of this work 'heavy'?

Yes  
No  
Don't know



---

Question 87

a. In the last fortnight have you done any of the activities on this card?

Yes  
No

b. Which of these activities have you done in the last fortnight?

c. How many times have you done ... in the last fortnight?

... times

d. On average, how long did you spend doing it each time?

SHOW CARD D

Keep fit, aerobics etc.  
Yoga  
Cycling  
Golf  
Jogging, Running  
Swimming  
Table tennis  
Basketball  
Football  
Rugby  
Badminton  
Tennis  
Squash, Fives, Rackets  
Cricket  
Windsurfing, Sailing  
Self defence, Boxing, Wrestling  
Back-packing, Hiking, etc.  
Walks of 2 miles or more  
Dancing

---

Question 88

a. Have you done any other physical activities in the last fortnight?

Yes  
No

b. What did you do?

...

c. How many times have you in the last fortnight?

... times

d. On average, how long did you spend doing it each time?

...

Country: Denmark  
Survey: Danish Health and Morbidity Survey  
Survey Code: DK 01  
Year: 1994  
Type: Face to Face

---

Question 80

If we look back on the past year, what would you say best describes your spare time activities?

Show card 14

heavy training and competitive sports regularly and several times a week  
exercise or heavy gardening at least 4 hours a week  
walk, bike or other easy exercise at least 4 hours a week (include Sunday excursions, light gardening and biking/walking to work  
read, watch TV or other sedentary occupation  
don't know  
no information

Country: Italy  
Survey: Aspects of daily life  
Survey Code: IT 02  
Year: 1994  
Type: Face to Face + self administered

---

Question 12.1

Over the last twelve months, have you, at least once, taken part in any kind of physical or sports activity (even when not requiring considerable physical exertion) during your free time?

Include activities such as jogging, going for a walk in the woods, or playing bowls. Do not include activities taking place during school hours or for work reasons

NO  
YES, but only occasionally  
YES, all the time

---

Question 12.2

Which activity?  
(more than one answer may be given)

Football, five-a-side football  
Gymnastics, aerobic dancing, body building  
Swimming  
Tennis  
Basketball  
Volleyball  
Jogging  
Walking, hiking  
Track and field athletics  
Winter sports  
Cycling  
Hunting  
Fishing  
Boating, sailing etc. (windsurfing, yachting, water-skiing, canoeing etc.)  
Wrestling, weight lifting and martial arts  
Bowls  
Other outdoor activities (trekking, mountaineering, hang gliding and horse-riding etc.)  
Other non-team sports  
Other team sports

---

Question 12.3

Considering all the activities you indicated above as a whole, how often haven you taken part in such activities over the last twelve months?

(only one answer may be given)

1-5 times (about once every quarter)

6-20 times (about once a month)

21-40 times (2-3 times a month, less than once a week)

41-60 times (about once a week)

61-120 times (about twice a week)

More than 120 times (more than twice a week)

---

Question 12.4

Have you carried out any sporting activity every month of the year?

YES

NO, I only carried out the activity for some months

---

Question 12.5

Over the last 12 months have you practiced sports in places upon payments?

NO

YES

---

Question 12.6

Over the last twelve months, have you had private sport classes or courses at your or your family's expenses?

NO

YES

Country: Spain  
Survey: National Health Survey  
Survey Code: ES 01  
Year: 1995  
Type: Face to Face

---

Question 29

What type of physical exercise do you take in your spare time? Tell me which of these possibilities best describes how you spend most of your spare time.

(SHOW CARD J)

I don't take any exercise. I spend virtually all of my free time sitting down (reading, watching television, in the cinema, etc.)

Occasional physical or sporting activity (walking or cycling, gardening, gentle gymnastics, recreational activities requiring slight exertion, etc.)

Regular physical activity, several times a month (tennis, gymnastics, running, swimming, cycling, team games, etc.)

Physical training several times a week

No answer

Country: Portugal  
Survey: National Health Survey  
Survey Code: PT 01  
Year: 1995  
Type: Face to Face

---

Question 8

DO YOU TAKE REGULAR EXERCISE IN ORDER TO KEEP FIT?

Yes  
No  
Don't know

---

Question 9

HOW MANY DAYS PER WEEK?

... days  
Don't know

---

Question 10

AND FOR HOW MANY MINUTES EACH DAY ON AVERAGE?

... minutes  
Don't know

Country: United Kingdom  
Survey: The Scottish Health Survey  
Survey Code: UK 10  
Year: 1995  
Type: Face to Face + self administered

---

Question 154

On how many occasions per week do you usually do exercises (press ups, sit ups, etc.)?

- Less than once a week
  - Once a week
  - 2-3 times a week
  - 4-5 times a week
  - 6-7 times a week or more
- 

Question 155

How much time do you usually spend doing exercises (press ups, sit-ups, etc.) on each occasion?

- Less than 10 minutes
  - 10 minutes, less than 20 minutes
  - 20 minutes, less than 30 minutes
  - 30 minutes, less than 2 hours
  - 2 hours or longer
- 

Question 156

When you do exercises (press-ups, sit-ups, etc.) do you usually find yourself

- breathing normally,
- breathing faster than normal,
- or gasping for breath?

---

Question 157

On how many occasions per week do you usually do aerobics/keep fit/dance for fitness?

- Less than once a week
  - Once a week
  - 2-3 times a week
  - 4-5 times a week
  - 6-7 times a week or more
- 

Question 158

How much time do you usually spend doing aerobics/keep fit/dance for fitness on each occasion?

- Less than 10 minutes
  - 10 minutes, less than 20 minutes
  - 20 minutes, less than 30 minutes
  - 30 minutes, less than 2 hours
  - 2 hours or longer
- 

Question 159

When you do aerobics/keep fit/dance for fitness do you usually find yourself

- breathing normally,
  - breathing faster than normal,
  - or gasping for breath?
- 

Question 160

On how many occasions per week do you usually go dancing?

- Less than once a week
  - Once a week
  - 2-3 times a week
  - 4-5 times a week
  - 6-7 times a week or more
- 

Question 161

How much time do you usually spend dancing?

- Less than 10 minutes
- 10 minutes, less than 20 minutes
- 20 minutes, less than 30 minutes



30 minutes, less than 2 hours  
2 hours or longer

---

Question 162

When you go dancing do you usually find yourself

breathing normally,  
breathing faster than normal,  
or gasping for breath?

---

Question 163

On how many occasions per week do you usually do weight training?

Less than once a week  
Once a week  
2-3 times a week  
4-5 times a week  
6-7 times a week or more

---

Question 164

How much time do you usually spend doing weight training?

Less than 10 minutes  
10 minutes, less than 20 minutes  
20 minutes, less than 30 minutes  
30 minutes, less than 2 hours  
2 hours or longer

---

Question 165

When you do weight training do you usually find yourself

breathing normally,  
breathing faster than normal,  
or gasping for breath?

---

Question 166

On how many occasions per week do you usually go swimming?

Less than once a week

Once a week  
2-3 times a week  
4-5 times a week  
6-7 times a week or more

---

Question 167

How much time do you usually spend swimming?

Less than 10 minutes  
10 minutes, less than 20 minutes  
20 minutes, less than 30 minutes  
30 minutes, less than 2 hours  
2 hours or longer

---

Question 168

When you go swimming do you usually find yourself

breathing normally,  
breathing faster than normal,  
or gasping for breath?

---

Question 169

On how many occasions per week do you usually go running/jogging?

Less than once a week  
Once a week  
2-3 times a week  
4-5 times a week  
6-7 times a week or more

---

Question 170

How much time do you usually spend going running/jogging?

Less than 10 minutes  
10 minutes, less than 20 minutes  
20 minutes, less than 30 minutes  
30 minutes, less than 2 hours  
2 hours or longer

---

Question 171

When you go running/jogging do you usually find yourself

breathing normally,  
breathing faster than normal,  
or gasping for breath?

---

Question 172

On how many occasions per week do you usually play football/rugby?

Less than once a week  
Once a week  
2-3 times a week  
4-5 times a week  
6-7 times a week or more

---

Question 173

How much time do you usually spend playing football/rugby?

Less than 10 minutes  
10 minutes, less than 20 minutes  
20 minutes, less than 30 minutes  
30 minutes, less than 2 hours  
2 hours or longer

---

Question 174

When you play football/rugby do you usually find yourself

breathing normally,  
breathing faster than normal,  
or gasping for breath?

---

Question 175

On how many occasions per week do you usually play badminton or tennis?

Less than once a week  
Once a week  
2-3 times a week  
4-5 times a week  
6-7 times a week or more

---

Question 176

How much time do you usually spend playing badminton or tennis?

- Less than 10 minutes
  - 10 minutes, less than 20 minutes
  - 20 minutes, less than 30 minutes
  - 30 minutes, less than 2 hours
  - 2 hours or longer
- 

Question 177

When you play badminton or tennis do you usually find yourself

- breathing normally,
  - breathing faster than normal,
  - or gasping for breath?
- 

Question 178

On how many occasions per week do you usually play squash?

- Less than once a week
  - Once a week
  - 2-3 times a week
  - 4-5 times a week
  - 6-7 times a week or more
- 

Question 179

How much time do you usually spend playing squash?

- Less than 10 minutes
  - 10 minutes, less than 20 minutes
  - 20 minutes, less than 30 minutes
  - 30 minutes, less than 2 hours
  - 2 hours or longer
- 

Question 180

When you play squash do you usually find yourself

- breathing normally,
- breathing faster than normal,
- or gasping for breath?

---

Question 181

On how many occasions per week do you usually play golf/go hillwalking?

- Less than once a week
  - Once a week
  - 2-3 times a week
  - 4-5 times a week
  - 6-7 times a week or more
- 

Question 182

How much time do you usually spend playing golf/going hill walking?

- Less than 10 minutes
  - 10 minutes, less than 20 minutes
  - 20 minutes, less than 30 minutes
  - 30 minutes, less than 2 hours
  - 2 hours or longer
- 

Question 183

When you play golf/go hillwalking do you usually find yourself

- breathing normally,
  - breathing faster than normal,
  - or gasping for breath?
- 

Question 193

During an average week in the spring or summer, would you normally do any heavy gardening or DIY of the kind listed on this card, or any similar type of heavy gardening or DIY?

SHOW CARD D.

- Yes
  - No
- 

Question 194

During the spring or summer, on how many occasions per week do you usually do this kind of heavy gardening or DIY?

- Less than once a week
  - Once a week
  - 2-3 times a week
  - 4-5 times a week
  - 6-7 times a week or more
- 

Question 195

How much time do you usually spend doing this kind of heavy gardening or DIY during the spring or summer?

- Less than 10 minutes
  - 10 minutes, less than 20 minutes
  - 20 minutes, less than 30 minutes
  - 30 minutes, less than 2 hours
  - 2 hours or longer
- 

Question 196

During an average week in the autumn or winter, would you normally do any heavy gardening or DIY of the kind listed on this card, or any similar type of heavy gardening or DIY?

SHOW CARD D.

- Yes
  - No
- 

Question 197

During the autumn or winter, on how many occasions per week do you usually do this kind of heavy gardening or DIY?

- Less than once a week
  - Once a week
  - 2-3 times a week
  - 4-5 times a week
  - 6-7 times a week or more
- 

Question 198

How much time do you usually spend doing this kind of heavy gardening or DIY during the autumn or winter?

- Less than 10 minutes
- 10 minutes, less than 20 minutes
- 20 minutes, less than 30 minutes

30 minutes, less than 2 hours  
2 hours or longer

Country: Estonia  
Survey: Estonian Health Interview Survey  
Survey Code: EE 01  
Year: 1996  
Type: Face to Face

---

Question G35

Have you ever in your life gone regularly in for competitive sports during at least one year?

Yes  
No

---

Question G 36

When did you start with regular competitive sports?

Year 19 ...

---

Question G 37

How often did you go in for competitive sports in that period when your sporting was most intensive?

Every day (almost every day)  
3–4 times in week  
1–2 times in week  
1–3 times in month

---

Question G 38

In what year did such period in your life start and when did it end?

Year of beginning 19 ...  
Year of ending 19 ...

---

Question G 39

Next we are going to talk about physical activity that is not aimed to make sports records, but instead is for your health or just to have fun



from the activity, and let us call it recreational sports.

Have you ever in your life participated in recreational sports?

- Yes
  - No
- 

Question G 40

Have you gone in for recreational sports during the last four weeks?

- Yes
  - No
- 

Question G 41

In what year and month did you last go in for recreational sports?

Year 19 ...  
Month: ...

---

Question G 42

How often did you go in for recreational sports during the last four weeks?

- Every day (almost every day)
  - 3–4 times in week
  - 1–2 times in week
  - 1–3 times in month
- 

Question G 43

Has such frequency of going in for hobby sports been for you usual during the last 12 months, or do you usually go more or do you go less?

- Yes, it is usual
- No, usually I go more
- No, usually I go less

Country: Iceland  
Survey: Omnibus survey  
Survey Code: IS 01  
Year: 1996  
Type: Telephone

---

Question 7

How often do you exercise to the extent that you sweat,  
feel your heart beating faster, or shortness of breath ?

- 3 times a week or more often
- 1-2 times a week
- 2-3 times a month
- Seldom/never (Don't exercise that way regularly)
- Deny to answer
- Don't know

Country: Denmark  
Survey: Recommendations WHO-EURO  
Survey Code: REC 01  
Year: 1996  
Type: Face to Face

---

Question 1

What describes best your leisure time activities during the last year?

Hard training and competitive sport more than once a week  
Jogging and other recreational sports or heavy gardening,  
at least 4 hours a week  
Walking, bicycling or other light activities at least 4 hours a  
week  
Reading, watching TV or other sedentary activities

---

Question 2

At least once a week do you engage in any regular activity,  
such as jogging, cycling, etc. long enough to work up sweat?

No  
Yes  
If yes:  
How many days per week?  
... days

Country: Austria  
Survey: Sport, Leisure Time and Home Accidents, and Smoking Habits  
Survey Code: AT 04  
Year: 1997  
Type: Face to Face

---

Question B 27

Which of the following types of sports do you engage in

regularly  
occasionally  
or never

Coding list A

- 10 Alpine skiing
- 11 Snowboarding
- 12 Ice skating
- 13 Other winter sports
- 14 Cycling
- 15 Mountain biking
- 16 Running, jogging
- 17 Hiking, mountaineering
- 18 Rock climbing
- 19 Gymnastics
- 20 Far Eastern martial arts
- 21 Football
- 22 Tennis
- 23 Squash
- 24 Other ball games
- 25 Inline skating
- 26 Skateboarding
- 27 Riding
- 28 Water sports
- 29 Other sports

In types of sports pursued, has there been no accident during the period from 1st December to 30th November 1997

one accident  
Two accidents  
or more than two accidents

Country: Belgium  
Survey: Health Interview Survey  
Survey Code: BE 01  
Year: 1997  
Type: Face to Face

---

Questions AP.01

What describes best your leisure time activities during the last year?

Show card 11 - only one answer is possible

Hard training and competitive sport more than once a week;  
Jogging and other recreational sports or gardening, at least 4 hours per week;  
Jogging and other recreational sports or gardening, at most 4 hours per week;  
Walking, bicycling or other light activities at least 4 hours a week;  
Walking, bicycling or other light activities at most 4 hours a week;  
Reading, watching TV or other sedentary activities.

Country: Switzerland  
Survey: Swiss Health Survey  
Survey Code: CH 01  
Year: 1997  
Type: Face to Face

---

Question 48.00

Do you work up a sweat caused by physical activity at least once a week in your leisure time?

Yes  
No  
No reply

---

Question 48.10

On how many days a week (on average)?

... day(s) a week (from 1 to 7 days)  
No reply

---

Question 48.40

Do you do gymnastics, fitness or play sports?

Yes  
No  
No reply

---

Question 48.50

How do you practice these physical activities or sports?

Do you do them...?

Very intensively  
Quite intensively  
Averagely intensively  
Not so intensively  
Not at all intensively  
No reply

---

Question 48.60

And for how many hours a week do you practice them?

- No. of hours: ...
- Don't know
- No reply

Country: Finland

Survey: FINRISK 97  
Survey Code: FI 02  
Year: 1997  
Type: Face to Face + self administered

---

Question 68

How much do you exercise and stress yourself physically in your leisure time? If it varies much according to different seasons, circle the alternative which best describes the average situation.

In my leisure time I read, watch TV, and work in the household with tasks which do not make me move much and which do not physically tax me.

In my spare time I walk, cycle or exercise otherwise at least 4 hours per week. This includes walking, fishing and hunting, light gardening etc. but excludes travel to work.

In my spare time I exercise to maintain my physical condition, f. ex. running, jogging, skiing, gymnastics, swimming, playing ball games or I do heavy gardening or the like for at least 3 hours per week.

In my spare time I regularly exercise competitive-wise several times a week running, orienteering, skiing, swimming, playing ball games or other heavy sports.

---

Question 70

How often do you exercise in your leisure time for at least half an hour so that you at least are mildly out of breath and sweaty?

daily  
2-3 times a week  
once a week  
2-3 times a month  
a few times a year or seldom  
I have a disability or a disease which does not enable me to exercise

---



Question 71

How many times in a week do you exercise in your free time for at least half an hour so that you at least are mildly out of breath and sweaty?

... times a week

---

Question 72

How long does your usual leisure time activity take?

I do not exercise in my free time  
less than 15 minutes  
15 - 29 minutes  
30 - 59 minutes  
one hour or longer

---

Question 73

How many kilometres do you usually run, jog or ski in a week?

... kilometres per week

---

Question 74

How many minutes do you daily walk, cycle or engage in a hobby in your leisure time that requires moving about (yard work or gardening, fixing or cleaning the house) ?

Do not count in the activity needed at work, travelling to work or leisure time sports

less than 15 minutes per day  
15-29 minutes per day  
30-44 minutes daily  
45-59 minutes daily  
over an hour per day

Country: Germany  
Survey: Survey on living conditions, health and environment  
Survey Code: DE 02  
Year: 1998  
Type: Self administered

---

Question 21

How often do you do sport?

Regularly, more than 2 hours a week  
Regularly, 1 to 2 hours a week  
Regularly, but less than 1 hour a week  
Occasionally, e.g. only on holiday  
Never

---

Question 22

Do you do sport...

on medical advice?  
For your own interest?

---

Question 23

The following list contains some of the things that one can do in one's leisure time. Please enter a cross against the frequency you do these things.

Answer categories:  
Daily  
At least once a week or at the week-end  
Once a month or less often  
Occasionally  
Not at all any more

Walking or hiking  
Actively doing sport  
Watching television  
Reading for entertainment or relaxation  
Doing work on the house  
Gardening  
Going to the theatre, concert or opera  
Going to the cinema

Attending other organised events (e.g. clubs, associations, etc.)  
Finishing off office work  
Earning additional money/money from a second job  
Pursuing voluntary commitments  
Pursuing a hobby, such as handicrafts, music making or  
model building  
Going to the restaurant or pub  
Meeting friends or acquaintances  
Meeting relatives

Country: Germany  
Survey: German National Health Examination and Interview Survey  
Survey Code: DE 05  
Year: 1998  
Type: ???

---

Question 61

When answering the questions about physical activity, please consider the last three months.

How often do you do sports?

Regularly, more than 4 hours per week  
Regularly, 2 - 4 hours per week  
Regularly, 1 - 2 hours per week  
Less than 1 hour per week  
No sports activities

---

Question 63

How often do you do sports or other strenuous activities in your free time, which cause you to sweat or to be out of breath?

answer categories  
Daily  
3-6 times per week  
1-2 times per week  
Seldom, about once a month  
Never

(Without a break)  
Less than 10 minutes  
10-20 minutes  
20-30 minutes  
30 minutes or more

---

Question 64

When you climb three flights of stairs are you (normally) out of breath and/or do you sweat?

Yes  
No  
Unable to climb 3 flights of stairs

Country: Ireland  
Survey: Survey of Lifestyle, Attitudes and Nutrition (SLÁN)  
Survey Code: IE 01  
Year: 1998  
Type: Self administered

---

Question B1

Considering a 7-day period (a week), how many times on average do you do the following kinds of exercise for more than 20 minutes during your free time?

- a. STRENUOUS EXERCISE (HEART BEATS RAPIDLY)  
(e.g. running, jogging, hockey, football, soccer, squash, basketball, judo, roller skating, vigorous swimming, vigorous long distance cycling)

... Times per Week

- b. MODERATE EXERCISE (NOT EXHAUSTING)  
(e.g. fast walking, tennis, badminton, easy swimming, easy cycling, volleyball, baseball, popular and folk dancing, heavy gardening)

... Times per Week

- c. MILD EXERCISE (MINIMAL EFFORT)  
(e.g. yoga, golf, easy walking, fishing from river bank, bowling, archery, light gardening)

... Times per Week

Country: Norway  
Survey: Survey on Living Conditions  
Survey Code: NO 01  
Year: 1998  
Type: Face to Face + self administered

---

#### Question H32

How much physical activity are you involved in during a normal week in the past 12 months. The way to and from work is considered leisure time.

Approximately how many hours per week were you engaged in light physical activity (no sweating or heavy breathing)

Not active  
Less than 1 hour per week  
1-2 hours per week  
3 hours or more per week

And approximately how many hours per week were you engaged in hard activity or work-out (sweating/heavy breathing)

Not active  
Less than 1 hour per week  
1-2 hours per week  
3 hours or more per week

---

#### Question H33

Do you sometimes exercise ? If so: how many days per week do you usually exercise?

never  
less often than once a week  
more often than once a week

PLEASE SPECIFY NUMBER OF DAYS DURING A NORMAL WEEK IN THE PAST 12 MONTHS : ...

Country: United Kingdom  
Survey: Health Education Monitoring Survey  
Survey Code: UK 02  
Year: 1998  
Type: Face to Face

---

Question 103

I'd like you to think about physical activities you have done when you were not doing your paid job.  
Have you done any housework in the past 4 weeks?

Yes  
No

Have you done any hoovering, dusting or ironing in the past 4 weeks?

Yes  
No

---

Question 107

Now I'd like you to think about any sports or exercise activities you do. Can you look at this card and tell me if you've done any of these types of activities during the past 4 weeks?

SHOW CARD BB

Yes  
No

Which of the activities did you do?

SHOW CARD BB

Aerobics/keep fit/gymnastics  
Bowls/Crown bowls  
Circuit training/weight training  
Cycling  
Exercises  
Dancing  
Football/Rugby  
Golf  
Hiking  
Hockey/Netball/Ice-skating  
Jogging/Running/Athletics  
Squash  
Swimming  
Tennis/Badminton

Any other sport or exercise activity like these  
Any other sport or exercise activity like these  
Other activity : please specify

Can you tell me on how many separate days did you  
(name of activity) during the past four weeks?  
How much time did you usually spend (name of activity)  
on each day?

... time in minutes

During the past four weeks, was the effort of (name of  
activity) usually enough to make you feel out of breath  
or sweaty?

Yes  
No



Country: United Kingdom  
Survey: Health Survey for England  
Survey Code: UK 09  
Year: 1998  
Type: Face to Face + self administered

---

Question 137

In the last week, that is last (day) up to yesterday, have you done any sports or exercise activities (not counting things done as part of school lessons)?

Show card H

Yes  
No

---

Question 138

Did you do any of these sports or exercise activities at the weekend, that is last Saturday and Sunday (yesterday and last Sunday)?

Yes  
No

---

Question 139

Was that on Saturday or Sunday or on both days?

Saturday only  
Sunday only  
Both Saturday and Sunday

---

Question 140

On Saturday and Sunday when you did these sports or exercise activities, how long did you spend daily?

Show card G

Less than 5 minutes  
5 minutes, less than 15 minutes

- 15 minutes, less than 30 minutes
  - 30 minutes, less than 1 hour
  - 1 hour, less than 1½ hours
  - 1½ hours, less than 2 hours
  - 2 hours, less than 2½ hours
  - 2½ hours, less than 3 hours
  - 3 hours, less than 3½ hours
  - 3½ hours, less than 4 hours
  - 4 hours or more
- 

Question 141

How long did you spend doing these sports or exercise activities?

... hours ... minutes

---

Question 142

Still thinking about last week. On how many of the weekdays did you do any of these sports or exercise activities? (Please remember not to count things done as part of school lessons)

- None in last week
  - 1 day
  - 2 days
  - 3 days
  - 4 days
  - 5 days
- 

Question 143

On each weekday that you did these sports or exercise activities, how long did you spend?

Show card G

- Less than 5 minutes
- 5 minutes, less than 15 minutes
- 15 minutes, less than 30 minutes
- 30 minutes, less than 1 hour
- 1 hour, less than 1½ hours
- 1½ hours, less than 2 hours
- 2 hours, less than 2½ hours
- 2½ hours, less than 3 hours
- 3 hours, less than 3½ hours
- 3½ hours, less than 4 hours
- 4 hours or more

---

Question 144

How long did you spend doing these sports or exercise activities on each weekday?

... hours ... minutes

---

Question 145

Now I would like to know about when you do active things, like the things on this card or other activities like these.

Did you do any active things like these at the weekend, that is last Saturday and Sunday?

Show card I

Yes  
No

---

Question 146

Was that on Saturday or Sunday or on both days?

Saturday only  
Sunday only  
Both Saturday and Sunday

---

Question 147

On Saturday/Sunday when you did active things like these, how long did you spend daily?

Show card G

Less than 5 minutes  
5 minutes, less than 15 minutes  
15 minutes, less than 30 minutes  
30 minutes, less than 1 hour  
1 hour, less than 1½ hours  
1½ hours, less than 2 hours  
2 hours, less than 2½ hours  
2½ hours, less than 3 hours  
3 hours, less than 3½ hours  
3½ hours, less than 4 hours  
4 hours or more

---

Question 148

How long did you spend doing active things like these?

... hours ... minutes

---

Question 149

Still thinking about last week. On how many of the weekdays did you do active things, like the things on this card or other activities like these (not counting things done as part of school lessons)?

Show card I

- None in last week
  - 1 day
  - 2 days
  - 3 days
  - 4 days
  - 5 days
- 

Question 150

On each weekday that you did active things like these, how long did you spend?

Show card G

- Less than 5 minutes
  - 5 minutes, less than 15 minutes
  - 15 minutes, less than 30 minutes
  - 30 minutes, less than 1 hour
  - 1 hour, less than 1½ hours
  - 1½ hours, less than 2 hours
  - 2 hours, less than 2½ hours
  - 2½ hours, less than 3 hours
  - 3 hours, less than 3½ hours
  - 3½ hours, less than 4 hours
  - 4 hours or more
- 

Question 151

How long did you spend doing active things like these on each weekday?

... hours ... minutes

---

Question 166

I'd like you to think about the physical activities you have done in the last few weeks (when you were not doing your paid job.)

Have you done any housework in the past four weeks, that is from (date four weeks ago) up to yesterday?

Yes  
No

---

Question 171

Have you done any gardening, do it yourself or building work in the past four weeks, that is since (date four weeks ago)?

Yes  
No

---

Question 172

Have you done any gardening, do it yourself or building work listed on this card?

Show card M

Yes  
No

---

Question 173

Have you done any gardening, do it yourself or building work from this other card, or any similar heavy manual work?

Show card N

Yes  
No

---

Question 174

During the past 4 weeks on how many days have you done this kind of heavy manual gardening or do it yourself?

... days

---

Question 175

On the days you did heavy manual gardening or do it yourself, how long did you usually spend?

... days

---

Question 184

Which have you done in the last four weeks?  
Any others?

Swimming,  
Cycling,  
Workout at a gym/Exercise bike/ Weight training  
Aerobics/Keep fit/Gymnastics/ Dance for fitness  
Any other type of dancing  
Running/jogging  
Football/rugby  
Badminton/tennis  
Squash  
Exercises (e.g. press-ups, sit ups)

---

Question 185

Have you done any other sport or exercise not listed on the card?

Yes  
No

---

Question 186

Can you tell me on how many separate days did you do (name of activity) for at least 15 minutes a time during the past four weeks, that is since (date four weeks ago)?

... hours ... minutes

---

Question 187

How much time did you usually spend doing (name of activity) on each day? (Only count times you did it for at least 15 minutes.)

... hours ... minutes

---

Question 188

During the past four weeks, was the effort of (name of activity) usually enough to make you out of breath or sweaty?

Yes

No

Country: United Kingdom  
Survey: The Scottish Health Survey  
Survey Code: UK 13  
Year: 1998  
Type: Face to Face

---

Question 178

I'd like you to think about the physical activities you have done in the last few weeks (when you were not doing your paid job.) Have you done any housework in the past four weeks, that is from (date four weeks ago) up to yesterday?

Yes  
No

Have you done any housework listed on this card?

SHOW CARD F

Yes  
No

Some kinds of housework are heavier than others. This card gives some examples of heavy housework. It does not include everything, these are just examples. Was any of the housework you did in the last four weeks this kind of heavy housework?

SHOW CARD G

Yes  
No

During the past four weeks on how many days have you done this kind of heavy housework?

...

On the days you did heavy housework, how long did you usually spend?

...

RECORD MINUTES SPENT ON HEAVY HOUSEWORK.

...



---

Question 179

Have you done any gardening, DIY or building work in the past four weeks, that is since (date four weeks ago)?

Yes  
No

Have you done any gardening, DIY or building work listed on this card?

SHOW CARD H

Yes  
No

Have you done any gardening, DIY or building work from this other card, or any similar heavy manual work?

SHOW CARD I

Yes  
No

During the past 4 weeks on how many days have you done this kind of heavy manual gardening or DIY?

...

On the days you did heavy manual gardening or DIY, how long did you usually spend?

...

RECORD MINUTES SPENT ON GARDENING OR DIY.

---

Question 181

Can you tell me if you have done any activities on this card during the last 4 weeks, that is since (date four weeks ago)? Include teaching, coaching, training and practice sessions.

SHOW CARD J

Yes  
No

Which have you done in the last four weeks?  
PROBE: Any others? CODE ALL THAT APPLY.

Swimming,  
Cycling,  
Workout at a gym/Exercise bike/ Weight training  
Aerobics/Keep fit/Gymnastics/ Dance for fitness  
Any other type of dancing  
Running/jogging  
Football/rugby

Badminton/tennis  
Squash  
Exercises (e.g. press-ups, sit ups)

Repeat for up to 6 additional sports:

Have you done any other sport or exercise not listed on the card?

Can you tell me on how many separate days did you do (name of activity) for at least 15 minutes a time during the past four weeks, that is since (date four weeks ago)?

How much time did you usually spend doing (name of activity) on each day? (Only count times you did it for at least 15 minutes.)

---

#### Question 182

During the past four weeks, was the effort of (name of activity) usually enough to make you out of breath or sweaty?

Yes  
No

Child physical activity module (2-15)

IF Age of Respondent is 4 years THEN

Can I just check, is (name of child) at school in reception class yet?

Yes  
No

---

#### Question 185

I would now like to ask you about any sports or exercise activities that you have done. I will then go on to ask about other active things you may have done like running about, riding a bike, kicking a ball around and things like that.

For the following questions please (include any activities done at a nursery or playgroup/don't count any activities done as part of school lessons).

In the last week, that is last (day 7 days ago) up to yesterday, have you done any sports or exercise activities (not counting things done as part of school lessons)?

This card shows some of the things you might have done; please also include any other sports or exercise

activities like these.

SHOW CARD L

Yes  
No

---

Question 186

Did you do any of these sports or exercise activities at the weekend, that is last Saturday and Sunday (yesterday and last Sunday)?

Yes  
No

Was that on Saturday or Sunday or on both days?

Saturday only  
Sunday only  
Both Saturday and Sunday

On (Saturday/Sunday/Saturday and Sunday) when you did these sports or exercise activities, how long did you spend (on each day)? Please give an answer from this card.

SHOW CARD K

Less than 5 minutes  
5 minutes, less than 15 minutes  
15 minutes, less than 30 minutes  
30 minutes, less than 1 hour  
1 hour, less than 1½ hours  
1½ hours, less than 2 hours  
2 hours, less than 2½ hours  
2½ hours, less than 3 hours  
3 hours, less than 3½ hours  
3½ hours, less than 4 hours  
4 hours or more, please specify how long: ... hours  
... minutes

---

Question 187

Still thinking about last week. On how many of the weekdays did you do any of these sports or exercise activities?

(Please remember not to count things done as part of school lessons)

None in last week  
1 day  
2 days  
3 days

4 days  
5 days

On each weekday that you did these sports or exercise activities, how long did you spend? Please give an answer from this card.

SHOW CARD K

Less than 5 minutes  
5 minutes, less than 15 minutes  
15 minutes, less than 30 minutes  
30 minutes, less than 1 hour  
1 hour, less than 1½ hours  
1½ hours, less than 2 hours  
2 hours, less than 2½ hours  
2½ hours, less than 3 hours  
3 hours, less than 3½ hours  
3½ hours, less than 4 hours  
4 hours or more (please specify how long)

How long did you spend doing these sports or exercise activities on each weekday?

...

---

### Question 188

Now I would like to know about when you do active things, like the things on this card or other activities like these.

Did you do any active things like these at the weekend, that is last Saturday and Sunday (yesterday and last Sunday)?

SHOW CARD M

Yes  
No

Was that on Saturday or Sunday or on both days?

Saturday only  
Sunday only  
Both Saturday and Sunday

On (Saturday/Sunday/Saturday and Sunday) when you did active things like these, how long did you spend (on each day)? Please give an answer from this card.

SHOW CARD K

Less than 5 minutes  
5 minutes, less than 15 minutes  
15 minutes, less than 30 minutes  
30 minutes, less than 1 hour  
1 hour, less than 1½ hours  
1½ hours, less than 2 hours

- 2 hours, less than 2½ hours
  - 2½ hours, less than 3 hours
  - 3 hours, less than 3½ hours
  - 3½ hours, less than 4 hours
  - 4 hours or more, please specify how long: ... hours  
... minutes
- 

Question 189

Still thinking about last week. On how many of the weekdays did you do active things, like the things on this card or other activities like these (not counting things done as part of school lessons)?

SHOW CARD M

- None in last week
- 1 day
- 2 days
- 3 days
- 4 days
- 5 days

On each weekday that you did active things like these, how long did you spend? Please give an answer from this card.

SHOW CARD D

- Less than 5 minutes
- 5 minutes, less than 15 minutes
- 15 minutes, less than 30 minutes
- 30 minutes, less than 1 hour
- 1 hour, less than 1½ hours
- 1½ hours, less than 2 hours
- 2 hours, less than 2½ hours
- 2½ hours, less than 3 hours
- 3 hours, less than 3½ hours
- 3½ hours, less than 4 hours
- 4 hours or more (please specify how long)

How long did you spend doing active things like these on each weekday?

...

RECORD HERE MINUTES SPENT DOING ACTIVE THINGS LIKE THESE.

Country: Austria  
Survey: Health Interview Survey  
Survey Code: AT 01  
Year: 1999  
Type: Face to Face

---

Question B 42

During your leisure time, do you work up sweat at least once a week as a result of physical exercise, e.g. as a result of jogging, sprint or endurance cycling or aerobics?

If so, how many days a week? Enter number or "no".

Those in employment: Go on to B 43!

Non-working women with child(ren) up to six years old:  
Go on to B 44!

Country: Spain  
Survey: Impairments, Disabilities and Health Status Survey  
Survey Code: ES 04  
Year: 1999  
Type: Face to Face

---

Question 11.26

Specify which type of physical exercise you do regularly in your spare time, that is, which of these possibilities best describes most of your spare time activity.

You do no exercise and spend almost all of your spare time doing sedentary activities (reading, watching television, going to the cinema, etc.)

You do some physical exercise or play sport occasionally (walking or cycling, gardening, leisurely workouts, recreational pursuits involving little exertion, etc.)

You do some physical exercise or play a sport several times a month (tennis, workouts, running, swimming, cycling, team games, etc.)

You do some physical exercise or play a sport several times a week

Country: France  
Survey: Health Barometer  
Survey Code: FR 06  
Year: 1999  
Type: Telephone

---

Question 159

Did you do any sports over the last 7 days ?

Yes  
No  
DON'T KNOW

If carries out some sports...

---

Question 160

Which one(s) ?

Athletics (apart from jogging)  
Rowing  
Badminton  
Basket ball  
Canoeing-kayaking  
Cycling  
Dancing  
Horse riding  
Rock climbing  
Football  
Golf  
Gymnastics  
Handball  
Jogging  
Judo  
Karate  
Walking (leisure) - Hiking  
Body-building  
Swimming  
Ice skating  
Pétanque (bowls)  
Windsurfing  
Diving  
Qi Gong  
Rollerblading/Rollerskating  
Rugby  
Skiing  
Surfing  
Tai chi chuan



Tennis  
Table tennis (ping-pong)  
Archery  
Volleyball  
Mountain biking  
Yoga  
Other 1, specify: ...  
Other 2, specify: ...  
Other 3, specify: ...  
Other 4, specify: ...  
Other 5, specify: ...  
DON'T KNOW  
OTHER SPORTS OVER AND ABOVE 5, please  
specify:....

---

Question 167

During the LAST SEVEN DAYS, how many hours...  
did you spend in a CLUB ?

... HOURS  
... MINUTES  
NONE  
DON'T KNOW

Athletics (apart from jogging)  
Rowing  
Badminton  
Basket ball  
Canoeing-kayaking  
Cycling  
Dancing  
Horse riding  
Rock climbing  
Football  
Golf  
Gymnastics  
Handball  
Jogging  
Judo  
Karate  
Walking (leisure) - Hiking  
Body-building  
Swimming  
Ice skating  
Pétanque (bowls)  
Windsurfing  
Diving  
Qi Gong  
Rollerblading/Rollerskating  
Rugby  
Skiing  
Surfing  
Tai chi chuan  
Tennis  
Table tennis (ping-pong)  
Archery  
Volleyball  
Mountain biking

Yoga  
Other 1, specify: ...  
Other 2, specify: ...  
Other 3, specify: ...  
Other 4, specify: ...  
Other 5, specify: ...

---

Question 176

During the LAST SEVEN DAYS, how many hours...  
were you ALONE OR WITH FRIENDS ? (APART FROM  
CLUBS, SCHOOL/UNIVERSITY AND WORK)

... HOURS  
... MINUTES  
NONE  
DON'T KNOW

Athletics (apart from jogging)  
Rowing  
Badminton  
Basket ball  
Canoeing-kayaking  
Cycling  
Dancing  
Horse riding  
Rock climbing  
Football  
Golf  
Gymnastics  
Handball  
Jogging  
Judo  
Karate  
Walking (leisure) - Hiking  
Body-building  
Swimming  
Ice skating  
Pétanque (bowls)  
Windsurfing  
Diving  
Qi Gong  
Rollerblading/Rollerskating  
Rugby  
Skiing  
Surfing  
Tai chi chuan  
Tennis  
Table tennis (ping-pong)  
Archery  
Volleyball  
Mountain biking  
Yoga  
Other 1, specify: ...  
Other 2, specify: ...  
Other 3, specify: ...  
Other 4, specify: ...  
Other 5, specify: ...

---

Question 179

From amongst the following suggestions, can you generally give me the main reason(s) which most motivates (motivate) you to do sport ?

- For pleasure
- For health reasons
- For slimming purposes
- To build up muscles
- To meet friends
- To win (competitive spirit)
- Because you have to (parents, school, family, doctor)
- Other reason (s), please specify: ...
- DON'T KNOW

Country: Italy  
Survey: Health Conditions and the Use of Health Services  
Survey Code: IT 01  
Year: 1999  
Type: Face to Face

---

Question 15.1

Over the last 12 months, in your free time, have you done one or more continuous physical activities or sports that required INTENSIVE TRAINING (competitive and non-competitive sports, gym, etc..)?

- NO
  - YES, over 4 hours per week
  - YES, 4 hours per week
  - YES, less than 4 hours per week
- 

Question 15.2

Over the last 12 months, in your free time, have you done any physical activity regularly, that made you a little sweaty?(jogging, gym, bike-riding, gardening, etc..)?

- NO
  - YES, over 4 hours per week
  - YES, 4 hours per week
  - YES, less than 4 hours per week
- 

Question 15.4

What is the main reason for your doing sports, a exercise or physical activity in your free time?

- Therapeutic purposes
- To keep in shape
- For recreation
- For other reasons

---

Question 15.5

Is your free time usually spent doing a sedentary activity (watching television, reading magazines and/or books, etc..)?

- No
- Yes, over 4 hours per week
- Yes, 4 hours per week
- Yes, less than 4 hours per week

Country: Canada  
Survey: Canadian Community Health Survey Cycle 1.1  
Survey Code: CA 01  
Year: 2000  
Type: Face to Face

---

Question PA1

Now I'd like to ask you about some of your physical activities. To begin with, I'll be dealing with physical activities not related to work, that is, leisure time activities.

Have you done any of the following in the past 3 months, that is, from ... (date three months ago to yesterday)?  
Mark all that apply.

- Walking for exercise
- Gardening or yard work
- Swimming
- Bicycling
- Popular or social dance
- Home exercises
- Ice hockey
- Ice skating
- In-line skating or rollerblading
- Jogging or running
- Golfing
- Exercise class or aerobics
- Downhill skiing or snowboarding
- Bowling
- Baseball or softball
- Tennis
- Weight-training
- Fishing
- Volleyball
- Basketball
- Any other, go to PA1US
- No physical activity
- DK, R

PA1US What was this activity? (Enter one activity only)

...

Country: Cyprus  
Survey: Population Risk Factors Survey  
Survey Code: CY 02  
Year: 2000  
Type: Face to Face

---

#### Question 31

In which group do you belong in relation to physical activity?  
Including any activity in your leisure time, like physical activity, gardening,  
dancing etc.

I am not physical active

Light physical activity

Vigorous activity of a minimum of 20 minutes duration for once or twice a week  
(sweating, heart beating, out of breath)

Vigorous activity of a minimum of 20 minutes duration for three or more times a  
Week

---

#### Question 33

How much physical activity do you have during your leisure-time;  
(If it varies with the seasons, mention the group that best represents the average  
of the year. Mention only one group)

In my leisure time I read, watch television and do things that do not require  
physical activity.

In my leisure time I walk, ride a bicycle, I go for hunting, I do light gardening for  
at least 4 hours a week. Going to and coming from work is not included.

In my leisure time I have physical activities to maintain fitness, such as running,  
gymnastics, swimming, playing football etc.

In my leisure time I do physical activity regularly, because I am involved in  
physically heavy sports.

---

#### Question 34

How many times a week in your leisure time do you do such physical activities  
that last at least 30 minutes and make you out of breath and sweating?  
(If not mark 0)

times a week: ...

Country: Finland  
Survey: Survey on Health Behaviour  
Survey Code: FI 01  
Year: 2000  
Type: Self administered

---

Question 89

How often in your leisure time do you exercise for at least half an hour so that you are at least slightly out of breath or sweaty?

- daily
  - 4 - 6 times a week
  - 2 - 3 times a week
  - once a week
  - 2 - 3 times a month
  - a few times a year or less
  - I cannot exercise due to an illness or injury
- 

Question 91

How much do you exercise and exert yourself physically in your leisure time? If the amount of exertion varies greatly depending on the time of the year, check the alternative that best describes the average situation.

- during my leisure time, I read, watch TV and perform chores where I do not need to move much and that do not tire me physically
- during my leisure time I walk, bicycle or exercise otherwise at least 4 hours a week
- during my leisure time, I do active fitness training at least 3 hours a week on average
- during my leisure time I train actively for competitions several times a week



Country: Finland  
Survey: Health 2000  
Survey Code: FI 03  
Year: 2000  
Type: Self administered

---

Question 27

How much do you exercise and strain yourself physically in your leisure time?  
(If there is major seasonal variation, select the option closest to your average situation.)

In my leisure time I read, watch TV and do other activities in which I do not move much and which do not strain me physically

In my leisure time I walk, cycle and move in other ways at least 4 hours per week

In my leisure time I exercise at least 3 hours per week

In my leisure time I practice regularly several times per week for competition  
(Choose this also if you train full time for competition sports)

---

Question 28

How often do you exercise in your leisure time so that you are at least slightly out of breath and sweating?

daily

4 - 6 times/week

2 - 3 times/week

once a week

2 - 3 times a month

few times a year or even more rarely

Country: France  
Survey: Continuous Survey on Households Living Conditions  
Survey Code: FR 07  
Year: 2000  
Type: Face to Face

---

Question A7

Do you carry out any sporting activities (whatever this activity – whether carried out with an organisation or individually)?

- Yes, several times a week
- Yes, once a week
- Yes, twice or three times a month
- Yes, once a month
- Less than once a month
- No, never
- Do not know

Country: International  
Survey: European Physical Activity Surveillance System (EUPASS)  
Survey Code:  
Year: 2000  
Type: Telephone

---

Question A3

How often are you engaged in sports or other strenuous activities during your leisure time which causes you to get into a sweat or out of breath. *(Multiple answers are possible)*

without a break

less than 10 minutes  
10 till 20 minutes  
20 till 30 minutes  
30 minutes or more

daily  
3 till 6 times per week  
1 till 2 times per week  
seldom, about once per month  
never

---

Question B5d

How much physical activity did you do in recreation, sport and other leisure-time activities in the last 7 days?

Much  
Moderate  
Little or no

Country: Italy  
Survey: Aspects of daily living  
Survey Code: IT 03  
Year: 2000  
Type: Face to Face

---

Question 12.3

During your spare time, does it happen to you to practice any type of physical activity such as walking for at least 2 kilometres, swimming, riding a bicycle or other at least a number of times during the year?

- NO
  - Yes, once or more than once a week
  - Yes, once or more than once a month
  - Yes, less frequently
- 

Question 12.4

Over the last 12 months, have you practiced sports in places upon payment?

- NO
  - YES
- 

Question 12.5

Over the last 12 months, have you had sports private classes or courses at your or your family's expenses?

- NO
  - YES
- 

Question 12.6

Do you pay a yearly or periodical fee to attend a sports club?

- NO
- YES

Country: Romania  
Survey: Health Interview Survey  
Survey Code: RO 01  
Year: 2000  
Type: Face to Face

---

Question 108

Which of the following activities describe the best what you have done in your spare time, during the previous 12 months?

- Professional sports or intensive training at least once a week
  - Jogging or other recreation sports, for at least 4 times a week
  - Walking, riding the bike or other low effort activities, for at least 4 times a week
  - Reading, watching TV or other sedentary activities
- 

Question 81

Which of the following activities describe best what your child has done in his/her spare time during the passed year?

- Professional sports or intensive training – at least once a week
- Jogging or other recreation sports – at least 4 hours a week
- Walking, riding the bike or other activities involving low physical efforts – at least 4 hours a week
- Reading, watching TV or other sedentary activities

Country: United Kingdom  
Survey: The Health Survey for England  
Survey Code: UK 12  
Year: 2000  
Type: Face to Face

---

Question 125

Can you tell me if you have done any activities on this card during the last four weeks, that is since (date four weeks ago)?

Yes  
No

Which have you done in the last four weeks?

SHOW CARD L

Swimming  
Cycling  
Keep fit/other exercises for fitness  
Exercises as part of physiotherapy  
Dancing  
Golf  
Yoga  
Bowls

---

Question 126

Have you done any other sport or exercise not listed on the card?

Yes  
No

If Yes

...

---

Question 127

Can you tell me on how many separate days did you do (name of activity) during the past four weeks, that is since (date four weeks ago)?

...

---

Question 128

How much time did you usually spend doing (name of activity) on each day?

HOURS: ...  
MINUTES: ...

---

Question 129

During the past four weeks, was the effort of (name of activity) usually enough to make you out of breath or sweaty?

Yes  
No

Country: United States  
Survey: National Health Interview Survey  
Survey Code: US 01  
Year: 2000  
Type: Face to Face

---

Question AHB.130

How often do you do physical activities specifically designed to STRENGTHEN your muscles such as lifting weights or doing calisthenics? (Include all such activities even if you have mentioned them before.)

NUMBER:

Never  
1-995 times per  
Unable to do this type activity  
Refused  
Don't know

TIME PERIOD:

Day  
Week  
Month  
Year  
Unable to do this activity  
Refused  
Don't know



Country: Australia  
Survey: National Health Survey  
Survey Code: AU 01  
Year: 2001  
Type: Face to Face

---

Question AF207

IN THE LAST 2 WEEKS, HAVE YOU WALKED FOR  
SPORT, RECREATION OR FITNESS?

Yes  
No

---

Question AF208

HOW MANY TIMES DID YOU WALK IN THE LAST 2  
WEEKS?

Number : ...

---

Question AF209

WHAT WAS THE TOTAL AMOUNT OF TIME YOU SPENT  
WALKING IN THE LAST 2 WEEKS?

Hours/minutes : ...  
100 hours or more

Country: Finland  
Survey: Health Behaviour among the Finnish Adult Population  
Survey Code: FI 06  
Year: 2001  
Type: Face to Face

---

Question 79

How often in your leisure time do you exercise for at least half an hour so that you are at least slightly out of breath or sweaty?

- daily
- 4 – 6 times a week
- 2 – 3 times a week
- once a week
- 2 – 3 times a month
- a few times a year or less
- I cannot exercise due to an illness or injury

Country: France  
Survey: Continuous Survey on Households Living Conditions  
Survey Code: FR 11  
Year: 2001  
Type: Face to Face

---

Question A7

Do you carry out any sporting activities (whatever this activity – whether carried out with an organisation or individually)?

- Yes, several times a week
- Yes, once a week
- Yes, twice or three times a month
- Yes, once a month
- Less than once a month
- No, never
- Do not know

Country: Iceland  
Survey: Health and Lifestyle of the Icelandic Population  
Survey Code: IS 03  
Year: 2001  
Type: Face to Face

---

Question 23

How often do you practice or do the following, on the average (judging by the part of the year when you are involved in that sport)?

Answer category:  
5 or more times/wk  
3-4 times/wk  
1-2 times/wk  
1-3 times/mo.  
5-11 times/yr.  
Less often  
Never

Badminton/tennis/squash  
Dancing  
Football/handball/basketball  
Golf  
Hiking (short hikes, e.g. in town)  
Riding  
Cycling  
Yoga  
Bowling  
Training at exercise centre  
Skiing inc. cross-country/snowboarding  
Jogging/long-distance running  
Angling/hunting  
Swimming  
Other, specify: ...

Country: Italy  
Survey: Aspects of Daily Living  
Survey Code: IT 04  
Year: 2001  
Type: Face to Face

---

Question 12.3

During your spare time, does it happen to you to practice any type of physical activity such as walking for at least 2 kilometres, swimming, riding a bicycle or other at least a number of times during the year?

- NO
  - Yes, once or more than once a week
  - Yes, once or more than once a month
  - Yes, less frequently
- 

Question 12.4

Over the last 12 months, have you practiced sports in places upon payment?

- NO
  - YES
- 

Question 12.5

Over the last 12 months, have you had sports private classes or courses at your or your family's expenses?

- NO
  - Yes
- 

Question 12.6

Do you pay a yearly or periodical fee to attend a sports club?

- NO
- Yes

Country: Netherlands  
Survey: Patient survey - Second Dutch National Survey of General Practice  
Survey Code: NL 02  
Year: 2001  
Type: Face to Face

---

Question LRV44g

How many different kinds of sports do you play in an average week?  
(For example: tennis, gymnastics, rollerblading, swimming)

...

---

Question LRV44h0

Which sport do you play most?

...

---

Question LRV44h1

How many days a week do you play it?

...

---

Question LRV44h2

And on average how many hours and minutes a day?

Number of hours: ...

---

Question LRV44h3

Number of minutes: ...

---

Question LRV44i0

Which sport do you play most often after that?

...

---

Question LRV44i1

How many days a week?

...

---

Question LRV44i2

And on average how many hours and minutes per day?

Number of hours: ...

---

Question LRV44i3

Number of minutes: ...

Country: Slovenia  
Survey: Slovenian Public Health Opinion - SJM01/3  
Survey Code: SI 02  
Year: 2001  
Type: Face to Face

---

Question 1.01

DO YOU GO IN FOR SPORT OR ANY PHYSICAL RECREATION?

Yes  
No

If yes, HOW OFTEN?

once a week  
2 to 3 times a week  
4 to 6 times a week  
each day



Country: Switzerland  
Survey: Swiss Health Survey 2002  
Survey Code: CH 02  
Year: 2002  
Type: Telephone

---

Question 44.00

During your free time, do you take physical activity at least once a week which makes you perspire?  
(such as running, cycling, fast walking)

yes  
no  
no reply

---

Question 44.01

How many days a week on average?

... days a week (between 1 and 7 days)  
no reply

Country: Czech Republic  
Survey: Sample Survey of the Health Status of the Czech Population  
Survey Code: CZ 01  
Year: 2002  
Type: Face to Face

---

Question 24a 1

Leisure time physical activity

During the past 7 days, on how many days did you do hard training and competitive sport [more than 10 minutes at a time]?

0-7

What is the total amount of time you spent over the past 7 days doing hard training and competitive sport [how many hours]?

...

---

Question 24a 2

Leisure time physical activity

During the past 7 days, on how many days did you do jogging and other recreational sports or heavy gardening and work in household [e.g. decorate the flat, more than 10 minutes at a time]?

0-7

What is the total amount of time you spent over the past 7 days doing jogging and other recreational sports or heavy gardening and work in household [how many hours]?

...

---

Question 24a 3

Leisure time physical activity

During the past 7 days, on how many days did you do walking, bicycling or other light activities [e.g. shopping, clean up the flat, more than 10 minutes at a time]?

0-7

What is the total amount of time you spent over the past 7 days doing walking, bicycling or other light activities [how many hours]?

---

Question 24e 4

Leisure time physical activity

During the past 7 days, on how many days did you do reading, watching TV or other sedentary activities [more than 10 minutes at a time]?

0-7

What is the total amount of time you spent over the past 7 days doing reading, watching TV or other sedentary activities [how many hours]?

Country: Finland  
Survey: FINRISK 2002  
Survey Code: FI 07  
Year: 2002  
Type: Self administered

---

#### Question 74

How much do you exercise and stress yourself physically in your leisure time? If it varies much according to different seasons, mark the alternative which best describes the average situation.

In my leisure time I read, watch TV, and work in the household with tasks which do not make me move much and which do not physically tax me.

In my spare time I walk, cycle or exercise otherwise at least 4 hours per week. This includes walking, fishing and hunting, light gardening etc. but excludes travel to work.

In my spare time I exercise to maintain my physical condition, e.g. running, jogging, skiing, gymnastics, swimming, playing ball games or I do heavy gardening or the like for at least 3 hours per week.

In my spare time I regularly exercise several times a week competitive sports such as running, orienteering, skiing, swimming, playing ball games or other heavy sports.

---

#### Question 76

How often do you in your leisure time exercise for at least 20-30 minutes so that you at least are mildly out of breath and sweaty?

daily

2-3 times a week

once a week

2-3 times a month

a few times a year or more seldom

I have a disability or a disease which does not enable me to exercise (proceed to question 79)

---

Question 77

How many times in a week do you exercise in your free time so that you at least are mildly out of breath and sweaty?  
(if not at all, mark 0.)

... times a week

---

Question 78

How long does your usual leisure time activity take?

I do not exercise in my free time  
less than 15 minutes  
15 - 29 minutes  
30 - 59 minutes  
one hour or longer

---

Question 79

How many minutes do you daily walk, cycle or engage in a hobby in your leisure time that requires moving about (yard work or gardening, fixing or cleaning the house)? Do not count in the activity needed at work, travelling to work (question 75) or leisure time sports (questions 76-78).

less than 15 minutes per day  
15-29 minutes per day  
30-44 minutes daily  
45-59 minutes daily  
over an hour per day

Country: Finland  
Survey: Health Behaviour among the Finnish Adult Population  
Survey Code: FI 13  
Year: 2002  
Type: Face to Face

---

Question 81

How often in your leisure time do you exercise for at least half an hour so that you are at least slightly out of breath or sweaty?

- daily
- 4 – 6 times a week
- 2 – 3 times a week
- once a week
- 2 – 3 times a month
- a few times a year or less
- I cannot exercise due to an illness or injury

Country: Ireland  
Survey: Survey of Lifestyle, Attitudes and Nutrition (SLAN)  
Survey Code: IE 03  
Year: 2002  
Type: Face to Face

---

Question B1

Considering a 7-day period (a week), how many times on average do you do the following kinds of exercise for more than 20 minutes during your free time?

(Please write the appropriate number on each line)

a) STRENUOUS EXERCISE (HEART BEATS RAPIDLY)

(e.g. running, jogging, hurling, camogie, football, soccer, squash, basketball, judo, roller skating, vigorous swimming, vigorous long distance cycling, advanced aerobics)

Times per Week: ...

b) MODERATE EXERCISE (NOT EXHAUSTING)

(e.g. fast walking, tennis, badminton, easy swimming, easy cycling, popular and folk dancing, intermediate aerobics, heavy gardening)

Times per Week: ...

c) MILD EXERCISE (MINIMAL EFFORT)

(e.g. yoga, golf, easy walking, fishing from river bank, bowling, beginners aerobics, archery, light gardening)

Times per Week: ...

d) LITTLE / NO ACTIVITIES

Times per Week: ...

---

Question B3

Do you attend a Gym/Leisure Centre?

Yes  
No

Country: Italy  
Survey: Aspects of Daily Living  
Survey Code: IT 05  
Year: 2002  
Type: Face to Face

---

Question 12.3

During your spare time, does it happen to you to practice any type of physical activity such as walking for at least 2 kilometres, swimming, riding a bicycle or other at least a number of times during the year?

- NO
  - Yes, once or more than once a week
  - Yes, once or more than once a month
  - Yes, less frequently
- 

Question 12.4

Over the last 12 months, have you practiced sports in places upon payment?

- NO
  - YES
- 

Question 12.5

Over the last 12 months, have you had sports private classes or courses at your or your family's expenses?

- NO
  - YES
- 

Question 12.6

Do you pay a yearly or periodical fee to attend a sports club?

- NO
- YES



Country: Norway  
Survey: Survey on living conditions & health, care and social relations  
Survey Code: NO 02  
Year: 2002  
Type: Face to Face

---

Question H32a

Questions regarding your physical activity in your free time during the past 12 months follow. Use a normal week as your basis and include travel to and from work as free time.

How many hours per week were you engaged in hard physical activity (no sweating/heavy breathing)?

- Not active
  - Less than 1 hour
  - 1-2 hours a week
  - 3 or more hours a week
- 

Question H32b

How many hours per week were you engaged in hard physical activity (sweating/heavy breathing)?

- Not active
  - Less than 1 hour
  - 1-2 hours a week
  - 3 or more hours a week
- 

Question H33

Do you usually exercise...

- Never
  - Less than once a week
  - Once a week or more
- 

Question H33a

How many days do you exercise during an average week...

NUMBER OF DAYS: ...

Country: Norway  
Survey: Cohort Norway  
Survey Code: NO 03  
Year: 2002  
Type: Self administered

---

Question 5a

How has your physical activity during leisure time been over the last year? Think of your weekly average for the year. Time spent going to or from work counts as leisure time

Hours per week

None

Less than 1

1-2

3 or more

Light activity (not sweating or out of breath)

Hard physical activity (sweating/out of breath)

---

Question 5b

Please note physical activity during the past year in your spare time. If activity varies between summer and wintertime, note a mean value. (Tick one only)

Reading, watching TV or any other sedentary activity?

Walking, cycling, or other activity, other for at least 4 hours a week?  
(Count also walking back and forth from work)

Light sports, heavy gardening? (At least 4 hours per week)

Hard exercise, competitive sports? Regularly and several times a week

Country: Slovakia  
Survey: Health Monitor Survey  
Survey Code: SK 02  
Year: 2002  
Type: Face to Face

---

Question 6.12

In your leisure time, how often do you do physical exercise for at least 30 minutes which makes you at least mildly short of breath or perspire?

- daily
- 4-6 times a week
- 2-3 times a week
- once a week
- 2-3 times a month
- a few times a year or less
- I cannot exercise because of illness
- I cannot exercise because of disability

Country: United Kingdom  
Survey: General Household Survey  
Survey Code: UK 07  
Year: 2002  
Type: Face to Face

---

Question 5 Tuition

Over the past twelve months have you received tuition from an instructor or coach to improve your performance in (activity)?

Yes  
No  
Not sure

---

Question 7 Sport

Did you take part in (activity) in the past four weeks?  
Again, please do not count any teaching coaching or refereeing you may have done.

Yes  
No

---

Question 8 Sprtime

On how many days in the last four weeks have you played/gone to (activity).

---

Question 9 Spwhere

At which of these places on this card have you done/played (activity) in the last four weeks ?

INDIVIDUAL PROMPT. CODE ALL THAT APPLY

Indoors at a facility which is mainly used for sport (e.g sports centre or gymnasium or indoor swimming pool or commercial leisure facility)

Indoors at some other location not mainly used for sport (such as a community centre, village hall or scout hut)

Indoors or outdoors at home or someone else's home

Outdoors on a court, course, pitch or playing field (or outdoor swimming pool)

Outdoors in a natural setting (such as the countryside, rivers, lakes or seaside)

Other - including roads and pathways in towns and Cities

---

Question 10 SchlCol

Do any of these facilities belong to a school, college or university?

Yes  
No

---

Question 11 SpClub

Over the past four weeks have you been a member of a club, particularly so that you can play/participate in (activity)?

Yes  
No

---

Question 12 ClubTyp

What type of club was this?  
(ENTER AT MOST 4 CODES)

Health/fitness  
Social club (e.g employee clubs, youth clubs)  
Sports club  
Other

---

Question 13 Volunt

Looking back over the last four weeks, have you spent any time helping to organise sport on a voluntary basis (that is, without pay except for expenses)? Please include any teaching, coaching or refereeing you may have done as a volunteer.

Yes  
No

---

Question 14 Voltime

During the last four weeks, how many hours in total have you spent on voluntary sports work?

- Less than 1 hour
  - 1 hour less than 2 hours
  - 2 hours less than 5 hours
  - 5 hours or more
- 

Question 15 Sprtnot

Is there any sport or recreational activity that you do not do at the moment but would like to do?

- Yes
  - No
- 

Question 16 Sprtwch

Which one activity would you like to do?

...

Country: United Kingdom  
Survey: Health Survey for England  
Survey Code: UK 28  
Year: 2002  
Type: Face to Face

---

Question 153

I would now like to ask you about any sports or exercise activities that you have/(name of child) has done. I will then go on to ask about other active things you/s/he may have done like running about, riding a bike, kicking a ball around and things like that.

For the following questions please include any activities done at a nursery or playgroup/don't count any activities done as part of school lessons.

In the last week, that is last (date last week) up to yesterday, have you/has (name of child) done any sports or exercise activities, not counting things done as part of school lessons???

This card shows some of the things you/s/he might have done; please also include any other sports or exercise activities like these.

Yes  
No

---

Question 154a

Did you/(name of person) do any of these sports or exercise activities at the weekend, that is last Saturday and Sunday/that is yesterday and last Sunday?

Yes  
No

---

Question 154b

IF Yes, Was that on Saturday or Sunday or on both days?

Saturday only  
Sunday only  
Both Saturday and Sunday

---

Question 155

On Saturday/Sunday/Saturday and Sunday when you/(name of child) did these sports or exercise activities, how long did you/s/he spend on each day/?

Please give an answer from this card.

- 15 minutes, less than 30 minutes
- 30 minutes, less than 1 hour
- 1 hour, less than 1 1/2 hours
- 1 1/2 hours, less than 2 hours
- 2 hours, less than 2 1/2 hours
- 2 1/2 hours, less than 3 hours
- 3 hours, less than 3 1/2 hours
- 3 1/2 hours, less than 4 hours
- 4 hours or more,(please specify how long: How long did you/ (name of child) spend doing these sports or exercise activities?

hours :... minutes: ....

---

Question 156

Still thinking about last week. On how many of the weekdays did you/ (name of child) do any of these sports or exercise activities? Please remember not to count things done as part of school lessons.

- None in last week
  - 1 day
  - 2 days
  - 3 days
  - 4 days
  - 5 days
- 

Question 157

On each weekday that you/(name of child) did these sports or exercise activities, how long did you/s/he spend?

Please give an answer from this card.

- 15 minutes, less than 30 minutes
- 30 minutes, less than 1 hour
- 1 hour, less than 1 1/2 hours
- 1 1/2 hours, less than 2 hours
- 2 hours, less than 2 1/2 hours
- 2 1/2 hours, less than 3 hours
- 3 hours, less than 3 1/2 hours
- 3 1/2 hours, less than 4 hours
- 4 hours or more,(please specify how long: How long did you/(name of child) spend doing these sports or exercise activities?

hours :... minutes: ....



---

Question 158

Now I would like to know about when you do/(name of child) does active things, like the things on this card or other activities like these.

Did you/s/he do any active things like these at the weekend, that is last Saturday and Sunday/that is yesterday and last Sunday?

- Yes
- No

---

Question 159

Was that on Saturday or Sunday or on both days?

- Saturday only
- Sunday only
- Both Saturday and Sunday

---

Question 160

On Saturday/Sunday/Saturday and Sunday when you/(name of child) did active things like these, how long did you/s/he spend on each day/?

- 15 minutes, less than 30 minutes
- 30 minutes, less than 1 hour
- 1 hour, less than 1 1/2 hours
- 1 1/2 hours, less than 2 hours
- 2 hours, less than 2 1/2 hours
- 2 1/2 hours, less than 3 hours
- 3 hours, less than 3 1/2 hours
- 3 1/2 hours, less than 4 hours
- 4 hours or more,(please specify how long: How long did you/(name of child) spend doing active things like these?

hours :... minutes: ....

---

Question 161

Still thinking about last week. On how many of the weekdays did you/ (name of child) do active things on this card or other activities like these not counting things done as part of school lessons?

- None in last week
- 1 day
- 2 days
- 3 days
- 4 days
- 5 days

---

Question 162

On each weekday that you/(name of child) did active things like these, how long did you/s/he spend? Please give an answer from this card.

- 15 minutes, less than 30 minutes
- 30 minutes, less than 1 hour
- 1 hour, less than 1 1/2 hours
- 1 1/2 hours, less than 2 hours
- 2 hours, less than 2 1/2 hours
- 2 1/2 hours, less than 3 hours
- 3 hours, less than 3 1/2 hours
- 3 1/2 hours, less than 4 hours
- 4 hours or more, please specify how long: How long did you/(name of child) spend doing active things like these on each weekday?

---

Question 164

Were the activities you/(name of child) did last week different from what you/s/he would usually do for any reason?

- No - same as usual
- Yes different - usually do more
- Yes different - usually do less

---

Question 169a

Have you done any gardening, Do It Yourself or building work in the past four weeks, that is since (date four weeks ago)?

- Yes
- No

---

Question 169b

IF Yes, Have you done any gardening, Do It Yourself or building work listed on this card?

- Yes
- No

---

Question 170a

Have you done any gardening, Do It Yourself or building work from this other card, or any similar heavy manual work?

- Yes
- No

---

Question 170b

IF Yes, during the past four weeks on how many days have you done this kind of heavy manual gardening or Do It Yourself, for at least 30 minutes a time?

... days

---

Question 173a

Can you tell me if you have done any activities on this card during the last four weeks, that is since (date four weeks ago)? Include teaching, coaching, training and practice sessions.

Yes  
No

---

Question 173b

IF Yes, which have you done in the last four weeks?

Swimming  
Cycling  
Workout at a gym/Exercise bike/ Weight training  
Aerobics/Keep fit/Gymnastics/ Dance for fitness  
Any other type of dancing  
Running/jogging  
Football/rugby  
Badminton/tennis  
Squash  
Exercises (e.g. press-ups, sit ups)

---

Question 173c

Have you done any other sport or exercise not listed on the card?

Yes  
No

---

Question 173d

IF Yes: .....

---

Question 174

Can you tell me on how many separate days did you do (activity) for

at least 15 minutes a time during the past four weeks, that is since  
(date four weeks ago)?

... days

---

Question 175

How much time did you usually spend doing (activity) on each day?  
(Only count times you did it for at least 15 minutes.)

Hours: ... Minutes: ...

---

Question 176

During the past four weeks, was the effort of (activity) usually enough  
to make you out of breath or sweaty?

Yes

No

Country: Canada  
Survey: Canadian Community Health Survey Cycle 2.1  
Survey Code: CA 02  
Year: 2003  
Type: Face to Face + Telephone

---

Question PAC\_Q1

Have you done any of the following in the past 3 months, that is, from [date three months ago] to yesterday?

- Walking for exercise
  - Gardening or yard work
  - Swimming
  - Bicycling
  - Popular or social dance
  - Home exercises
  - Ice hockey
  - Ice skating
  - In-line skating or rollerblading
  - Jogging or running
  - Golfing
  - Exercise class or aerobics
  - Downhill skiing or snowboarding
  - Bowling
  - Baseball or softball
  - Tennis
  - Weight-training
  - Fishing
  - Volleyball
  - Basketball
  - Soccer
  - Any other
  - No physical activity
- 

Question PAC\_Q1VS

What was this activity?

...

---

Question PAC\_Q1X

In the past 3 months, did you do any other physical activity for leisure?

- Yes
- No

---

Question PAC\_Q1XS

What was this activity?

...

---

Question PAC\_Q1Y

In the past 3 months, did you do any other physical activity for leisure?

Yes

No

---

Question PAC\_Q1YS

What was this activity?

...

---

Question PAC\_Q2n

In the past 3 months, how many times did you [participate in identified activity]?

... Times

(MIN: 1) (MAX: 99 for each activity except the following: Walking: MAX = 270

Bicycling: MAX = 200 Other activities: MAX = 200)

---

Question PAC\_Q3n

About how much time did you spend on each occasion?

1 to 15 minutes

16 to 30 minutes

31 to 60 minutes

More than one hour

---

Question UPE\_Q2A

When in-line skating or rollerblading, how often do you wear a helmet?

Always

Most of the time

Rarely

Never

---

Question UPE\_Q2B

How often do you wear wrist guards or wrist protectors?

- Always
  - Most of the time
  - Rarely
  - Never
- 

Question UPE\_Q2C

How often do you wear elbow pads?

- Always
  - Most of the time
  - Rarely
  - Never
- 

Question UPE\_Q3A

Earlier, you mentioned going downhill skiing or snowboarding in the past 3 months.

Was that:

- ... downhill skiing only?
  - ... snowboarding only?
  - ... both ?
- 

Question UPE\_Q3B

In the past 12 months, did you do any downhill skiing or snowboarding?

- Downhill skiing only
  - Snowboarding only
  - Both
  - Neither
- 

Question UPE\_Q4A

When downhill skiing, how often do you wear a helmet?

- Always
- Most of the time
- Rarely
- Never

---

Question UPE\_Q5A

When snowboarding, how often do you wear a helmet?

- Always
  - Most of the time
  - Rarely
  - Never
- 

Question UPE\_Q5B

How often do you wear wrist guards or wrist protectors?

- Always
  - Most of the time
  - Rarely
  - Never
- 

Question UPE\_Q6

In the past 12 months, have you done any skateboarding?

- Yes
  - No
- 

Question UPE\_Q6A

How often do you wear a helmet?

- Always
  - Most of the time
  - Rarely
  - Never
- 

Question UPE\_Q6B

How often do you wear wrist guards or wrist protectors?

- Always
- Most of the time
- Rarely
- Never



---

Question UPE\_Q6C

How often do you wear elbow pads?

- Always
  - Most of the time
  - Rarely
  - Never
- 

Question STR\_Q6\_6

How often do you jog or do other exercise to deal with stress?

- Often
  - Sometimes
  - Rarely
  - Never
- 

Question ETA\_Q13

You think about burning up calories when you exercise.

- Always
- Usually
- Often
- Sometimes
- Rarely
- Never

Country: Cyprus  
Survey: Health Survey 2003  
Survey Code: CY 01  
Year: 2003  
Type: Face to Face

---

Question 17

Do you do any of the following activities in your leisure time?

Hard training and competitive sports more than once a week  
Jogging and other recreational sports or heavy gardening at least 4 hours a week  
Walking, bicycling or other light activities at least 4 hours a week  
Reading, watching TV or other sedentary activities

Country: Spain  
Survey: National Health Survey 2003  
Survey Code: ES 03  
Year: 2003  
Type: Face to Face

---

Question 32

Which of the following possibilities best describes the frequency with which you carry out any physical activity in your free time?

- Do not carry out any physical activity whatsoever
  - Carry out some type of physical or sporting activity less than once a month
  - Carry out some type of physical or sporting activity once or various times a month, but less than once a week
  - Carry out some type of physical or sporting activity once or various times a week
- 

Question 25

Which of the following possibilities best describes the frequency with which the child carries out any physical activity in their free time?

- They do not carry out any physical activity whatsoever
- They carry out some type of physical or sporting activity less than once a month
- They carry out some type of physical or sporting activity once or various times a month but less than once a week
- They carry out some type of physical or sporting activity once or various times a Week

Country: Finland  
Survey: Health Behaviour among the Finnish Adult Population  
Survey Code: FI 10  
Year: 2003  
Type: Face to Face

---

Question 84

How often in your leisure time do you exercise for at least half an hour so that you are at least slightly out of breath or sweaty?

- daily
  - 4–6 times a week
  - 2–3 times a week
  - once a week
  - 2–3 times a month
  - a few times a year or less
  - I cannot exercise due to an illness or injury
- 

Question 86

How much do you exercise and exert yourself physically in your leisure time?  
If the amount of exertion varies greatly depending on the time of the year, check the alternative that best describes the average situation.

- during my leisure time, I read, watch TV and perform chores where I do not need to move much and that do not tire me physically
- during my leisure time I walk, bicycle or exercise otherwise at least 4 hours a week
- during my leisure time, I do active fitness training at least 3 hours a week on average
- during my leisure time, I train actively for competitions several times a week

Country: Croatia  
Survey: Croatian Health Survey  
Survey Code: HR 04  
Year: 2003  
Type: Face to Face

---

Question PHA 03

In your leisure time, how often do you do physical exercise for at least 30 minutes which makes you at least mildly short of breath or perspire?

Not physically active  
Several times a year  
2 to 3 times a month  
Once a week  
2 to 3 times a week  
4 to 6 times a week  
Every day

Country: International  
Survey: Joint Canada/United States Survey of Health (JCUSH)  
Survey Code: INT 12  
Year: 2003  
Type: Telephone

---

Question PAC\_Q01

Now I'd like to ask you about some of your physical activities. To begin with, I'll be dealing with physical activities not related to work, that is, leisure time activities.

Have you done any of the following in the past 3 months, that is, from <date three months ago> to yesterday?

Walking for exercise  
Gardening or yard work  
Swimming  
Bicycling  
Popular or social dance  
Home exercises  
Ice hockey  
Ice skating  
In-line skating or rollerblading  
Jogging or running  
Golfing  
Exercise class or aerobics  
Downhill skiing  
Bowling  
Baseball or softball  
Tennis  
Weight-training  
Fishing  
Volleyball  
Basketball  
Soccer  
Any other  
No physical activity

What was this activity?

...

---

Question PAC\_Q02

In the past 3 months, how many times did you participate in <identified activity>?

... Times (MIN: 1) (MAX: 99 for each activity except the following:  
Walking: MAX = 270  
Bicycling: MAX = 200  
Other activities: MAX = 200)

---

Question PAC\_Q03

About how much time did you spend on each occasion?

- 1 to 15 minutes
- 16 to 30 minutes
- 31 to 60 minutes
- More than one hour

Country: Italy  
Survey: Aspects of Daily Living  
Survey Code: IT 07  
Year: 2003  
Type: Face to Face + self administered

---

Question 12.3

(If you do not practice any sport, otherwise go to question 12.4)

During your spare time, does it happen to you to practice any type of physical activity such as walking for at least 2 kilometres, swimming, riding a bicycle or other at least a number of times during the year?

- NO
  - YES, once or more than once a week
  - YES, once or more than once a month
  - YES, less frequently
- 

Question 12.4

(If you practice sport regularly or occasionally, otherwise go to question 13.1)

Over the last 12 months, have you practiced sports in places upon payment?

- NO
  - YES
- 

Question 12.5

Over the last 12 months, have you had sports private classes or courses at your or your family's expenses?

- NO
  - YES
- 

Question 12.6

Do you pay a yearly or periodical fee to attend a sports club?

- NO
- YES



Country: Sweden  
Survey: Living Condition Survey  
Survey Code: SE 03  
Year: 2003  
Type: Face to Face

---

Question 63 B

I would now like to ask about how much exercise you get in your leisure time.  
Which of these alternatives fits you best?

- Practically no exercise at all
- Some exercise now and then (e.g. short walks)
- Exercise regularly about once a week
- Exercise regularly about twice a week
- Exercise regularly and fairly vigorously at least twice a week

Country: Australia  
Survey: National Health Survey  
Survey Code: AU 03  
Year: 2004  
Type: Face to Face

---

Question 4

The next few questions are about walking for sport, recreation and fitness.

Please do not include any other walking that you may have done for other reasons. This will be recorded later.

In the last 2 weeks have you walked for sports, recreation or fitness?

Yes  
No

---

Question 5

How many times did you walk for sports, recreation or fitness in the last 2 weeks?

...  
Don't know

---

Question 6

What was the total amount of time you walked for sports, recreation or fitness in the last 2 weeks?

Time in minutes: ...  
Don't know

Time in hours: ...  
Don't know

Time in hours/minutes: ...  
Don't know

---

Question 7

The next few questions are about moderate and vigorous exercise apart from walking that you may have done for exercise, sport or fitness. I will ask about moderate exercise first, then about vigorous exercise.

In the last 2 weeks did you do any exercise which caused a moderate increase in your heart rate or breathing, that is, moderate exercise?

Yes  
No

---

Question 8

How many times did you do any moderate exercise in the last 2 weeks?

...  
Don't know

---

Question 9

What was the total amount of time you spent doing moderate exercise in the last 2 weeks?

Time in minutes: ...  
Don't know

Time in hours: ...  
Don't know

Time in hours: ...  
Don't know

---

Question 10

In the last 2 weeks did you do any other exercise which caused a large increase in your heart rate or breathing, that is, vigorous exercise?

Yes  
No

---

Question 11

How many times did you do any vigorous exercise in the last 2 weeks?

...  
Don't know

---

Question 12

What was the total amount of time you spent doing vigorous exercise in the last 2 weeks?

Time in minutes: ...  
Don't know

Time in hours: ...  
Don't know

Time in hours: ...  
Don't know

Country: Estonia  
Survey: Health behaviour among Estonian adult population  
Survey Code: EE 07  
Year: 2004  
Type: Self administered

---

Question 72

In your leisure time, how often do you do physical exercises (Sunday sports) that makes you at least mildly short of breath or perspire for at least 30 minutes?

- daily
- 4–6 times a week
- 2–3 times a week
- once a week
- 2–3 times a month
- a few times a year or less
- I cannot exercise because of damage or illness

Country: Finland  
Survey: Health Behaviour among the Finnish Adult Population  
Survey Code: FI 12  
Year: 2004  
Type: Face to Face

---

Question 74

How often in your leisure time do you exercise for at least half an hour so that you are at least slightly out of breath or sweaty?

- daily
  - 4–6 times a week
  - 2–3 times a week
  - once a week
  - 2–3 times a month
  - a few times a year or less
  - I cannot exercise due to an illness or injury
- 

Question 76

How much do you exercise and exert yourself physically in your leisure time?  
If the amount of exertion varies greatly depending on the time of the year, check the alternative that best describes the average situation.

- during my leisure time, I read, watch TV and perform chores where I do not need to move much and that do not tire me physically
- during my leisure time I walk, bicycle or exercise otherwise at least 4 hours a week
- during my leisure time, I do active fitness training at least 3 hours a week on average
- during my leisure time, I train actively for competitions several times a week

Country: Greece  
Survey: National Survey: Psychosocial factors and Health  
Survey Code: GR 05  
Year: 2004  
Type: Face to Face

---

Question EP27

During a regular week, how many days on the whole do you physical exercise?

- None
  - 1 day
  - 2 days
  - 3 days
  - 4 days
  - 5 days
  - 6 days
  - 7 days
  - Do not answer
- 

Question EP28

For how many minutes do you exercise?

- ...
- Do not answer

Country: International (Finland, Baltic States)  
Survey: FINBALT Health Monitor  
Survey Code:  
Year: 2004  
Type: Self administered

---

Question 56

In you leisure time, how often do you do physical exercise for at least 30 min. which makes you at least mildly short of breath or perspire?

- 1 daily
- 2 4-6 times a week
- 3 2-3 times a week
- 4 once a week
- 5 2-3 times a month
- 6 a few times a year or less
- 7 I cannot exercise because of an illness
- 8 I cannot exercise because of disability



Country: Poland  
Survey: Health Population Status  
Survey Code: PL 06  
Year: 2004  
Type: Face to Face

---

Question 88

Do you perform the following activities in your free time?

Do you perform these activities?

Yes  
No

If yes , how many hours per week, on the average?

Types of activities:

Reading, watching television, listening to the radio or other activities not requiring movement and physical strain

Walks, gymnastics, bike riding, roller blades or other non-intensive physical activity

Running, swimming, aerobics or other recreational sport, seasonal working in the garden

Intensive physical workout (for ex. weight room), sport

---

Question 58

Does the child regularly participate in organized sport trainings (in -school after lessons, at a sporting club, at the pool)?

Yes  
No

---

Question 59

Please, give the number of hours per week

...

Country: Sweden  
Survey: Survey of Living Conditions  
Survey Code: SE 04  
Year: 2004  
Type: Face to Face

---

Question 60c

I would now like to ask about how much exercise you get in your leisure time.  
Which of these alternatives fit you best?

- Practically no exercise at all
- Some exercise now and then (e.g. short walks)
- Exercise regularly about once a week
- Exercise regularly about twice a week
- Exercise regularly and fairly vigorously at least twice a week

Country: United States  
Survey: National Health Interview Survey  
Survey Code: US 02  
Year: 2004  
Type: Face to Face + Telephone

---

Question AHB.090

The next questions are about physical activities (exercise, sports, physically active hobbies...) that you may do in your LEISURE time.

How often do you do VIGOROUS leisure-time physical activities for AT LEAST 10 MINUTES that cause HEAVY sweating or LARGE increases in breathing or heart rate?

- \* Read if necessary: How many times per day, per week, per month, or per year do you do these activities?
- \* Enter number for vigorous leisure-time physical activities.
- \* Enter '0' for Never.
- \* Enter '996' if unable to do this type of activity.

Never  
1-995 time(s)  
Unable to do this type activity  
Refused  
Don't know

- \* Enter time period for vigorous leisure-time physical activities.

Never  
Per day  
Per week  
Per month  
Per year  
Unable to do this activity  
Refused  
Don't know

---

Question AHB.100

About how long do you do these vigorous leisure-time physical activities each time?

- \* Enter number for length of vigorous leisure-time physical activities.

1-995  
Refused  
Don't know

- \* Enter time period for length of vigorous leisure-time physical activities.

Minutes  
Hours  
Refused  
Don't know

---

Question AHB.110

How often do you do LIGHT OR MODERATE LEISURE-TIME physical activities for AT LEAST 10 MINUTES that cause ONLY LIGHT sweating or a SLIGHT to MODERATE increase in breathing or heart rate?

- \* If necessary, prompt with: How many times per day, per week, per month, or per year do you do these activities?
- \* Enter number of light or moderate leisure-time physical activities.
- \* Enter '0' for Never.
- \* Enter '996' if unable to do this type of activity.

Never  
1-995 time(s)  
Unable to do this type of activity  
Refused  
Don't know

- \* Enter time period for light or moderate leisure-time physical activities

Never  
Per day  
Per week  
Per month  
Per year  
Unable to do this activity  
Refused  
Don't know

---

Question AHB.120

About how long do you do these light or moderate leisure-time physical activities each time?

- \* Enter number for length of light or moderate leisure-time physical activities.

1-995  
Refused  
Don't know

- \* Enter time period for length of light or moderate leisure-time physical activities.

Minutes  
Hours  
Refused  
Don't know

---

Question AHB.130

How often do you do LEISURE-TIME physical activities specifically designed to STRENGTHEN your muscles such as lifting weights or doing calisthenics?  
(Include all such activities even if you have mentioned them before.)

- \* Read if necessary: How many times per day, per week, per month, or per year do you do these activities?
- \* Enter number for strengthening activities.
- \* Enter '0' for Never.
- \* Enter '996' for Unable to do this type activity

Never  
1-995 time(s)  
Unable to do this type activity  
Refused  
Don't know

- \* Enter time period for strengthening activities

Never  
Per day  
Per week  
Per month  
Per year  
Unable to do this activity  
Refused  
Don't know

Country: Canada  
Survey: National Population Health Survey (NPHS)  
Survey Code: CA 03  
Year: 2005  
Type: Face to Face + Telephone

---

Question PA\_Q1

Now I'd like to ask you about some of your physical activities. To begin with, I'll be dealing with physical activities not related to work, that is, leisure time activities.

Have you done any of the following in the past 3 months, that is, from [date three months ago] to yesterday?

Walking for exercise  
Gardening or yard work  
Swimming  
Bicycling  
Popular or social dance  
Home exercises  
Ice hockey  
Ice skating  
In-line skating or rollerblading  
Jogging or running  
Golfing  
Exercise class or aerobics  
Downhill skiing or snowboarding  
Bowling  
Baseball or softball  
Tennis  
Weight-training  
Fishing  
Volleyball  
Basketball  
Any other  
No physical activity  
DK, R

---

Question HS\_Q1US

What was this activity?

...

---

Question PA\_Q1W

In the past 3 months, did you do any other activity for leisure?

Yes  
No  
DK, R

What was this activity?

...

---

Question PA\_Q1X

In the past 3 months, did you do any other activity for leisure?

Yes  
No  
DK, R

What was this activity?

...

---

Question PA\_Q2

In the past 3 months, how many times did you participate in [identified activity]?

... Times

(MIN: 1) (MAX: 99) for each activity except the following:

Walking: MAX = 270

Bicycling: MAX = 200

Other activities: MAX = 200

DK, R

---

Question PA\_Q3

About how much time did you spend on each occasion?

1 to 15 minutes  
16 to 30 minutes  
31 to 60 minutes  
More than one hour

Country: Germany  
Survey: Telephone Health Survey 2004-2005  
Survey Code: DE 07  
Year: 2005  
Type: Telephone

---

Question 231

Thinking back over the last 3 months, have you done any sport during that time?

yes  
no  
d.k.  
n.a.

---

Question 232

... and how many hours in the weeks was it?

Was it ...

up to an hour  
up to two hours  
up to four hours  
more than four hours  
d.k.  
n.a./answer refused



Country: Denmark  
Survey: The Danish Health Interview Survey  
Survey Code: DK 03  
Year: 2005  
Type: Face to Face

---

Question 24

Which types of exercise training or sports have you participated in during the past year?

...

Have not participated in exercise training or sports

---

Question 24a

If you have participated in exercise training or sports during the past year:

What are the two most important reasons that you participate in exercise training or sports?

To stay in shape, get in shape  
For the sake of my appearance  
To be together with other people  
To lose weight  
To have fun  
To unwind  
Other, write here: ...

Country: Finland  
Survey: Health Behaviour among the Finnish Adult Population  
Survey Code: FI 19  
Year: 2005  
Type: Self administered

---

Question 79

How often in your leisure time do you exercise for at least half an hour so that you are at least slightly out of breath or sweaty?

- daily
  - 4 – 6 times a week
  - 2 – 3 times a week
  - once a week
  - 2 – 3 times a month
  - a few times a year or less
  - I cannot exercise due to an illness or injury
- 

Question 81

How much do you exercise and exert yourself physically in your leisure time? If the amount of exertion varies greatly depending on the time of the year, check the alternative that best describes the average situation.

- during my leisure time I read, watch TV and perform chores where I do not need to move much and that do not tire me physically
  - during my leisure time I walk, bicycle or exercise otherwise at least 4 hours a week
  - during my leisure time I do active fitness training at least 3 hours a week on average
  - during my leisure time I train actively for competitions several times a week
- 

Question 101

Are you a member in any society or organization?

- no
- yes
- health and/or patient-organization
- gymnastics and/or sports association
- other organization

Country: Italy  
Survey: Health Conditions and the Use of Health Services 2004-2005  
Survey Code: IT 08  
Year: 2005  
Type: Face to Face

---

Question 17.1

During your free-time, do you practice, at least once a week:  
(Read all answers and fill for each row)

Physical activity with heavy physical effort (sport at competitive or not  
competitive level, cycling, jogging, etc)

Moderate physical activity, that is until perspiring (gym, moderate speed bicycle  
rides, etc)

Light physical activity (at least 1 Km walks, light gym , etc)

No

Yes

(If yes)

How many days a week: ...

How long every time on average

Less than 20 minutes

20 minutes and more, specify in minutes: ...

Country: Italy  
Survey: Aspects of Daily Living  
Survey Code: IT 09  
Year: 2005  
Type: Face to Face + self administered

---

Question 12.3

(If you do not practice any sport, otherwise go to question 12.4)

During your spare time, does it happen to you to practice any type of physical activity such as walking for at least 2 kilometres, swimming, riding a bicycle or other at least a number of times during the year?

- NO
  - YES, once or more than once a week
  - YES, once or more than once a month
  - YES, less frequently
- 

Question 12.4

(If you practice sport regularly or occasionally, otherwise go to question 13.1)

Over the last 12 months, have you practiced sports in places upon payment?

- NO
  - YES
- 

Question 12.5

Over the last 12 months, have you had sports private classes or courses at your or your family's expenses?

- NO
  - YES
- 

Question 12.6

Do you pay a yearly or periodical fee to attend a sports club?

- NO
- YES

Country: Netherlands  
Survey: Continuous Quality of Life Survey  
Survey Code: NL 09  
Year: 2005  
Type: Face to Face + self administered

---

Question Wandelen

Do you walk regularly for pleasure?

Yes  
No  
Doesn't know  
Refuses to answer

---

Question UurWand

How many hours do you spend walking?

5 or more hours a week  
1-5 hours a week  
Less than 1 hour a week  
Never  
Doesn't know  
Refuses to answer

---

Question Fietsen

Do you cycle regularly for pleasure?

Yes  
No  
Doesn't know  
Refuses to answer

---

Question UurFiets

How many hours do you spend cycling?

5 or more hours a week  
1-5 hours a week  
Less than 1 hour a week  
Never  
Doesn't know  
Refuses to answer

Country: Sweden  
Survey: National Survey of Public Health  
Survey Code: SE 05  
Year: 2005  
Type: ???

---

### Question 36

How much have you moved about and exerted yourself physically in your free time during the past 12 months?  
If your activity varies between e.g. summer and winter, try and give an average.  
Note! Mark only one alternative.

#### Free time spent sitting down

You spend time mostly reading, with TV, cinema or other sedentary occupation during your free time. You walk, cycle or move about in other ways for less than 2 hours a week.

#### Moderate exercise in free time

You walk, cycle or move about in other ways for at least two hours a week without sweating. This includes cycling to and from work, other walks, normal gardening, fishing, table-tennis, bowling.

#### Moderate regular exercise in free time

You exercise regularly 1-2 times a week for at least 30 minutes at a time. running, swimming, tennis, badminton or other activity that makes you sweat.

#### Regular exercise and training

You spend time for example running, swimming, tennis, badminton, exercise gymnastics or similar on at least three occasions a week. Each occasion lasts at least 30 minutes.

Country: Sweden  
Survey: Survey of Living Conditions  
Survey Code: SE07  
Year: 2005  
Type: Face to Face

---

Question 60c

I would now like to ask about how much exercise you get in your leisure time.  
Which of these alternatives fit you best?

- Practically no exercise at all
- Some exercise now and then (e.g. short walks)
- Exercise regularly about once a week
- Exercise regularly about twice a week
- Exercise regularly and fairly vigorously at least twice a week

Country: United Kingdom  
Survey: Health Survey for England  
Survey Code: UK 31  
Year: 2005  
Type: Face to Face

---

Question Sport

I would now like to ask you about any sports or exercise activities that you have/ (name of child) has done. I will then go on to ask about other active things you/s/he may have done like running about, riding a bike, kicking a ball around and things like that.

For the following questions please include any activities done at a nursery or playgroup/don't count any activities done as part of school lessons.  
(Continue)

In the last week, that is last (date last week) up to yesterday, have you/has (name of child) done any sports or exercise activities, not counting things done as part of school lessons?

This card shows some of the things you/s/he might have done; please also include any other sports or exercise activities like these.

Yes  
No

---

Question WESpDo

Did you/(name of person) do any of these sports or exercise activities at the weekend, that is last Saturday and Sunday/that is yesterday and last Sunday?

Yes  
No

---

Question DWESp

Was that on Saturday or Sunday or on both days?

Saturday only  
Sunday only  
Both Saturday and Sunday



---

Question WeSpor

On Saturday/Sunday/Saturday and Sunday when you/(name of child) did these sports or exercise activities, how long did you/s/he spend on each day/? Please give an answer from this card.

- Less than 5 minutes
- 5 minutes, less than 15 minutes
- 15 minutes, less than 30 minutes
- 30 minutes, less than 1 hour
- 1 hour, less than 1 1/2 hours
- 1 1/2 hours, less than 2 hours
- 2 hours, less than 2 1/2 hours
- 2 1/2 hours, less than 3 hours
- 3 hours, less than 3 1/2 hours
- 3 1/2 hours, less than 4 hours
- 4 hours or more (please specify how long)

---

Question WeSpH

How long did you/(name of child) spend doing these sports or exercise activities?

...

---

Question DaySp

Still thinking about last week. On how many of the weekdays did you/(name of child) do any of these sports or exercise activities? Please remember not to count things done as part of school lessons.

- None in last week
- 1 day
- 2 days
- 3 days
- 4 days
- 5 days

---

Question WkSpor

On each weekday that you/(name of child) did these sports or exercise activities, how long did you/s/he spend? Please give an answer from this card.

- Less than 5 minutes
- 5 minutes, less than 15 minutes
- 15 minutes, less than 30 minutes
- 30 minutes, less than 1 hour
- 1 hour, less than 1 1/2 hours
- 1 1/2 hours, less than 2 hours
- 2 hours, less than 2 1/2 hours
- 2 1/2 hours, less than 3 hours
- 3 hours, less than 3 1/2 hours
- 3 1/2 hours, less than 4 hours
- 4 hours or more (please specify how long)

---

Question WkSpH

How long did you/(name of child) spend doing these sports or exercise activities on each weekday?

...

---

Question WEActDo

Now I would like to know about when you do/(name of child) does active things, like the things on this card or other activities like these. Did you/s/he do any active things like these at the weekend, that is last Saturday and Sunday/that is yesterday and last Sunday?

Yes  
No

---

Question DWEAct

Was that on Saturday or Sunday or on both days?

Saturday only  
Sunday only  
Both Saturday and Sunday

---

Question WeAct

On Saturday/Sunday/Saturday and Sunday when you/(name of child) did active things like these, how long did you/s/he spend on each day/?  
Please give an answer from this card.

Less than 5 minutes  
5 minutes, less than 15 minutes  
15 minutes, less than 30 minutes  
30 minutes, less than 1 hour  
1 hour, less than 1 1/2 hours  
1 1/2 hours, less than 2 hours  
2 hours, less than 2 1/2 hours  
2 1/2 hours, less than 3 hours  
3 hours, less than 3 1/2 hours  
3 1/2 hours, less than 4 hours  
4 hours or more (please specify how long)

---

Question WeActH

How long did you/(name of child) spend doing active things like these?

...

---

Question WkActDo

Still thinking about last week. On how many of the weekdays did you/(name of child) do active things on this card or other activities like these not counting things done as part of school lessons?

- None in last week
  - 1 day
  - 2 days
  - 3 days
  - 4 days
  - 5 days
- 

Question WkAct

On each weekday that you/(name of child) did active things like these, how long did you/s/he spend? Please give an answer from this card.

- Less than 5 minutes
  - 5 minutes, less than 15 minutes
  - 15 minutes, less than 30 minutes
  - 30 minutes, less than 1 hour
  - 1 hour, less than 1 1/2 hours
  - 1 1/2 hours, less than 2 hours
  - 2 hours, less than 2 1/2 hours
  - 2 1/2 hours, less than 3 hours
  - 3 hours, less than 3 1/2 hours
  - 3 1/2 hours, less than 4 hours
  - 4 hours or more (please specify how long)
- 

Question WkActH

How long did you/(name of child) spend doing active things like these on each weekday?

...

---

Question DaysTot

Now thinking about all the activities during the past week you have just told me about including any walking, gardening, housework, sports or other active things. On how many days in the last week in total did you/(name of child) do any of these activities not counting things done as part of school lessons?

- None
- One day
- Two days
- Three days
- Four days
- Five days
- Six days
- Every day

---

Question Usual

Were the activities you/(name of child) did last week different from what you/s/he would usually do for any reason?

IF YES PROBE: Would you/s/he usually do more physical activity or less?

No - same as usual

Yes different - usually do more

Yes different - usually do less

Country: Austria  
Survey: Health Interview Survey  
Survey Code: AT 06  
Year: 2006  
Type: Face to Face

---

Question D5.7

What describes best your leisure time activities during the last year?

- Hard training and competitive sport more than once a week
- Jogging and other recreational sports or heavy gardening, at least 4 hours a week
- Jogging and other recreational sports or heavy gardening, less than 4 hours a week
- Walking, bicycling or other light activities at least 4 hours a week
- Walking, bicycling or other light activities less 4 hours a week
- Reading, watching TV or other sedentary activities

Country: Serbia  
Survey: National Health Survey, Serbia 2006  
Survey Code: CS 01  
Year: 2006  
Type: Face to Face + self administered

---

#### Question SV2

How much physical activity do you get in your leisure time? (One answer.)  
If examinee states more than one answer, only one which relates to the most intensive, i.e. activity which requires highest physical effort should be marked.

- Read, watch TV or similar
  - Mainly walking, drive bicycle or similar (walking, fishing, hunting) at least 4 hours per week
  - I keep fit (running, swimming, skiing, ball playing, hard work in the garden or similar) at least 4 hours per week
  - I practice sport at least few times a week
- 

#### Question SV3

How often are you engaged in physical activity exercises at least 30 minutes in leisure time, so that you start breathing faster or start sweating? (One answer)

- Every day
  - 4-6 times a week
  - 2-3 times a week
  - Once a week
  - 2-3 times per month
  - Few times a year/never
  - Can not exercise due to illness/invalidity
- 

#### Question SV5

How often do you engage in physical exercises, in leisure time, so that you start breathing faster or start sweating?

- Almost every day
- 3 times a week
- 1-2 times a week
- 2-3 times a month
- A few times a year/never
- Cannot exercise due to illness/invalidity

---

Question SV6

How many hours a week do you practice physical activity until you start sweating and start breathing faster (excluding school activities)?

Up to 1 hour

2-3 hours

4-6 hours

7 or more than 7 hours

Country: Germany  
Survey: Telephone Health Survey 2005-2006  
Survey Code: DE 08  
Year: 2006  
Type: Telephone

---

Question 138

Thinking back over the last 3 months, have you done any sport during that time?

yes  
no  
d.k.  
n.a.

---

Question 139

... and how many hours in the weeks was it?

Was it ...

up to an hour  
up to two hours  
up to four hours  
more than four hours  
d.k.  
n.a./answer refused



Country: Estonia  
Survey: Estonian Health Interview Survey 2006  
Survey Code: EE 08  
Year: 2006  
Type: Face to Face

---

Question T13

Now we are going to talk about physical activity and exercises that can be called active exercises. These include jogging, ball games, swimming, skating, dancing and also harder garden work.

Have you ever in your life been involved in active exercises? These include jogging, other recreational sports and harder garden work.

Yes  
No

---

Question T14

Have you participated in active exercises during the last 4 weeks?

Yes  
No

---

Question T15

How often did you participate in active exercises during the last 4 weeks?

Almost every day  
3 – 4 times a week  
1 – 2 times a week  
1 – 3 times a month

---

Question T16

How many hours per week did you participate in active exercises during the last 4 weeks?

... hours

---

Question T17

The following questions are connected with intensive sports activities.

Have you ever in your life been involved in intensive training or competitive sports, i.e. at least 3-4 training sessions per week, during at least one year?

Yes

No

---

Question T18

Have you participated in intensive training or competitive sports, i.e. at least 3-4 training sessions per week, during the last 4 weeks?

Yes

No

---

Question T19

How often did you participate in intensive training or competitive sports, i.e. 3-4 training sessions a week, during the last 4 weeks?

Every day/almost every day

3 – 4 times a week

Country: Spain  
Survey: National Health Survey  
Survey Code: ES 06  
Year: 2006  
Type: Face to Face

---

Question 91

Do you normally do all the physical exercise you would like to do in your free time?

Yes  
No

---

Question 92

Why not?

Because my health problems prevent me from doing so  
Because I prefer to do other kinds of leisure activities (go to the cinema, read a book, watch TV, etc.)  
Because I haven't got a place to do the physical activities I would like to do  
Due to lack of time  
Due to a lack of will power  
Other reasons

---

Question 93

Do you regularly do any physical activity like walking, doing sport or going to the gym in your free time?

Yes  
No, I don't normally do physical exercise

---

Question 94

Could you tell me how often you have done the activities set out below for over 20 minutes in the last two weeks?

N° of times: ...

A light physical activity like walking, gardening, easy gym activities, games that require little effort or similar activities  
A moderate physical activity like riding a bicycle, gymnastics, aerobics, running or swimming

An intense physical activity like football, basketball, competitive cycling or swimming, judo karate or similar activities

---

Question 57

Which of the following possibilities best describes the frequency with which the child performs any kind of physical activity in his/her free time?

He/She doesn't do exercise. His/Her free time is almost completely taken up by sedentary activities (reading, watching television, going to the cinema, lying in bed or the cot, etc.)

He/she does some kind of physical activity or sport (walking, riding a bike, light gym activities, light recreational activities, etc.)

He/she does physical activities several times a week (sports, gymnastics, running, swimming, cycling, team sports, etc.)

Does sport or physical training several times a week

Country: France  
Survey: National Survey on Nutrition and Health (ENNS)  
Survey Code: FR 18  
Year: 2006  
Type: Face to Face

---

Question E58

During the past week, on how many days did your child play outdoors apart from at school? This means unsupervised activities such as playing in the square, outside the house, going rollerblading, etc.

School days: ... days /5 days max.  
Days with little or no school: ... days/3 days max.  
Doesn't know  
Refuses to answer

---

Question E60

During the past week, during how many hours did your child have sports lessons outside of school (team sports, dance, tennis, judo, etc.)?

... days/7 days  
Refuses to answer  
Doesn't know

Country: Italy  
Survey: Aspects of Daily Living  
Survey Code: IT 10  
Year: 2006  
Type: Face to Face + self administered

---

Question 12.3

(If you do not practice any sport, otherwise go to question 12.4)

During your spare time, does it happen to you to practice any type of physical activity such as walking for at least 2 kilometres, swimming, riding a bicycle or other at least a number of times during the year?

- NO
  - YES, once or more than once a week
  - YES, once or more than once a month
  - YES, less frequently
- 

Question 12.4

(If you practice sport regularly or occasionally, otherwise go to question 13.1)

Over the last 12 months, have you practiced sports in places upon payment?

- NO
  - YES
- 

Question 12.5

Over the last 12 months, have you had sports private classes or courses at your or your family's expenses?

- NO
  - YES
- 

Question 12.6

Do you pay a yearly or periodical fee to attend a sports club?

- NO
- YES

Country: Lithuania  
Survey: Lithuanian Health Behaviour Monitoring  
Survey Code: LT 05  
Year: 2006  
Type: Self administered

---

Question 74

In your leisure time, how often do you do physical exercise for at least 30 min which makes you at least mildly short of breath or perspire?

- daily
- 4-6 times a week
- 2-3 times a week
- once a week
- 2-3 times a month
- a few times a year or less
- I cannot exercise because of an illness

Country: Netherlands  
Survey: Continuous Quality of Life Survey  
Survey Code: NL 10  
Year: 2006  
Type: Face to Face + self administered

---

Question Wandelen

Do you walk regularly for pleasure?

Yes  
No  
Doesn't know  
Refuses to answer

---

Question UurWand

How many hours do you spend walking?

5 or more hours a week  
1-5 hours a week  
Less than 1 hour a week  
Never  
Doesn't know  
Refuses to answer

---

Question Fietsen

Do you cycle regularly for pleasure?

Yes  
No  
Doesn't know  
Refuses to answer

---

Question UurFiets

How many hours do you spend cycling?

5 or more hours a week  
1-5 hours a week  
Less than 1 hour a week  
Never  
Doesn't know  
Refuses to answer



Country: United Kingdom  
Survey: Health Survey for England  
Survey Code: UK 33  
Year: 2006  
Type: Face to Face

---

Question SportDo

I would now like to ask you about any sports or exercise activities that you have/(name of child) has done. I will then go on to ask about other active things you/s/he may have done like running about, riding a bike, kicking a ball around and things like that. For the following questions please include any activities done at a nursery or playgroup/don't count any activities done as part of school lessons.

In the last week, that is last (date last week) up to yesterday, have you/has (name of child) done any sports or exercise activities, not counting things done as part of school lessons?

This card shows some of the things you/s/he might have done; please also include any other sports or exercise activities like these.

Yes  
No

---

Question WESpDo

Did you/(name of person) do any of these sports or exercise activities at the weekend, that is last Saturday and Sunday/that is yesterday and last Sunday?

Yes  
No

---

Question DWESp

Was that on Saturday or Sunday or on both days?

Saturday only  
Sunday only  
Both Saturday and Sunday

---

Question WeSpor

On Saturday/Sunday/Saturday and Sunday when you/(name of child) did these sports or exercise activities, how long did you/s/he spend on each day?

- Less than 5 minutes
- 5 minutes, less than 15 minutes
- 15 minutes, less than 30 minutes
- 30 minutes, less than 1 hour
- 1 hour, less than 1 1/2 hours
- 1 1/2 hours, less than 2 hours
- 2 hours, less than 2 1/2 hours
- 2 1/2 hours, less than 3 hours
- 3 hours, less than 3 1/2 hours
- 3 1/2 hours, less than 4 hours
- 4 hours or more (please specify how long)

Question WeSpH-WeSpM

4 hours or more THEN

How long did you/(name of child) spend doing these sports or exercise activities?

RECORD HOURS SPENT BELOW

...

RECORD HERE MINUTES SPENT WALKING.

...

Question DaySp

Still thinking about last week. On how many of the weekdays did you/(name of child) do any of these sports or exercise activities? Please remember not to count things done as part of school lessons.

- None in last week
- 1 day
- 2 days
- 3 days
- 4 days
- 5 days

Question WkSpor

On each weekday that you/(name of child) did these sports or exercise activities, how long did you/s/he spend?

- Less than 5 minutes
- 5 minutes, less than 15 minutes
- 15 minutes, less than 30 minutes
- 30 minutes, less than 1 hour
- 1 hour, less than 1 1/2 hours
- 1 1/2 hours, less than 2 hours
- 2 hours, less than 2 1/2 hours
- 2 1/2 hours, less than 3 hours

3 hours, less than 3 1/2 hours  
3 1/2 hours, less than 4 hours  
4 hours or more, please specify how long: ...

---

Question WkSpH-WkSpM

4 hours or more THEN

How long did you/(name of child) spend doing these sports or exercise activities on each weekday?

RECORD HOURS SPENT BELOW

...

RECORD HERE MINUTES SPENT WALKING.

...

---

Question DaysTot

Now thinking about all the activities during the past week you have just told me about including any walking, gardening, housework, sports or other active things. On how many days in the last week in total did you/(name of child) do any of these activities not counting things done as part of school lessons?

None  
One day  
Two days  
Three days  
Four days  
Five days  
Six days  
Every day

---

Question WESitDo-DSit

Now I'd like to know about when you/(name of child) spend time sitting down doing things like the ones on this card. Did you/s/he spend time sitting down doing any things like these for at least 5 minutes a time at the weekend

Yes  
No

Was that on Saturday or Sunday or on both days?

Saturday only  
Sunday only  
Both Saturday and Sunday

---

Question Garden

Have you done any gardening, DIY or building work in the past four weeks, that is since (date four weeks ago)?

Yes  
No

Have you done any gardening, DIY or building work listed on this card?

Yes  
No

---

Question ManWork

Have you done any gardening, DIY or building work from this other card, or any similar heavy manual work?

Yes  
No

During the past four weeks on how many days have you done this kind of heavy manual gardening or DIY, for at least 30 minutes a time?

...

---

Question ManDays

During the past four weeks on how many days have you done this kind of heavy manual gardening or DIY?

...

---

Question HrsDIY

On the days you did heavy manual gardening or DIY, how long did you usually spend?

...

Record minutes spent on gardening or DIY

...

---

Question ActPhy

Can you tell me if you have done any activities on this card during the last four weeks, that is since (date four weeks ago)? Include teaching, coaching, training

and practice sessions.

Yes  
No

---

Question WhtAct

Which have you done in the last four weeks? Any others?

Swimming  
Cycling  
Workout at a gym/Exercise bike/ Weight training  
Aerobics/Keep fit/Gymnastics/ Dance for fitness  
Any other type of dancing  
Running/jogging  
Football/rugby  
Badminton/tennis  
Squash  
Exercises (e.g. press-ups, sit ups)

---

Question OActQ

Have you done any other sport or exercise not listed on the card?

Yes  
No

Probe for name of sport or exercise.

...

---

Question DayExc

Can you tell me on how many separate days did you do (activity) for at least 15 minutes a time during the past four weeks, that is since (date four weeks ago)?

...

---

Question ExcHrs

How much time did you usually spend doing (activity) on each day? (Only count times you did it for at least 15 minutes.)

...

RECORD MINUTES HERE

...

During the past four weeks, was the effort of (activity) usually enough to make

you out of breath or sweaty?

Yes

No

Country: United States  
Survey: National Health Interview Survey  
Survey Code: US 04  
Year: 2006  
Type: Face to Face + Telephone

---

Question AHB.090

The next questions are about physical activities (exercise, sports, physically active hobbies...) that you may do in your LEISURE time.

How often do you do VIGOROUS leisure-time physical activities for AT LEAST 10 MINUTES that cause HEAVY sweating or LARGE increases in breathing or heart rate?

How many times per day, per week, per month, or per year do you do these activities?

- Never
- 1-995 time(s)
- Unable to do this type activity
- Refused
- Don't know

Enter time period for vigorous leisure-time physical activities.

- Never
  - Per day
  - Per week
  - Per month
  - Per year
  - Unable to do this activity
  - Refused
  - Don't know
- 

Question AHB.100

About how long do you do these vigorous leisure-time physical activities each time?

Enter number for length of vigorous leisure-time physical activities.

- 1-995
- Refused
- Don't know

Enter time period for length of vigorous leisure-time physical activities.

- Minutes
- Hours
- Refused
- Don't know

---

Question AHB.110

How often do you do LIGHT OR MODERATE LEISURE-TIME physical activities for AT LEAST 10 MINUTES that cause ONLY LIGHT sweating or a SLIGHT to MODERATE increase in breathing or heart rate?

If necessary, prompt with: How many times per day, per week, per month, or per year do you do these activities?

- Never
- 1-995 time(s)
- Unable to do this type activity
- Refused
- Don't know

Enter time period for light or moderate leisure-time physical activities

- Never
- Per day
- Per week
- Per month
- Per year
- Unable to do this activity
- Refused
- Don't know

---

Question AHB.120

About how long do you do these light or moderate leisure-time physical activities each time?

Enter number for length of light or moderate leisure-time physical activities.

- 1-995
- Refused
- Don't know

Enter time period for length of light or moderate leisure-time physical activities.

- Minutes
- Hours
- Refused
- Don't know

---

Question AHB.130

How often do you do LEISURE-TIME physical activities specifically designed to STRENGTHEN your muscles such as lifting weights or doing calisthenics? (Include all such activities even if you have mentioned them before.)

How many times per day, per week, per month, or per year do you do these activities?

- Never



1-995 time(s)  
Unable to do this type activity  
Refused  
Don't know

Enter time period for strengthening activities

Never  
Per day  
Per week  
Per month  
Per year  
Unable to do this activity  
Refused  
Don't know

Country: Australia  
Survey: National Health Survey  
Survey Code: AU 04  
Year: 2007  
Type: Face to Face

---

Question EXER\_Q01

The next few questions are about walking for fitness, recreation and sport. Please do not include any other walking that [you/proxy name] may have done for other reasons. This will be recorded later.

In the last 2 weeks [have you/has (proxy name)] walked for fitness, recreation or sport?

- Yes
  - No
  - Permanently unable to walk
- 

Question EXER\_Q02

How many times did [you/proxy name] walk (for fitness, recreation or sport) in the last 2 weeks.

...

---

Question EXER\_Q03

What was the total amount of time [you/proxy name] spent walking (for fitness, recreation or sport) in the last 2 weeks?

hours: ...  
minutes: ...

---

Question EXER\_Q04

How many days in the last week did [you/proxy name] walk for fitness, recreation or sport?

...

---

Question EXER\_Q06

What was the total amount of time [you/proxy name] spent walking for fitness, recreation or sport in the last week?

hours: ...

minutes: ...

Country: Canada  
Survey: Canadian Health Measures Survey  
Survey Code: CA 04  
Year: 2007  
Type: Face to Face

---

Question PAC\_Q11

Now I'd like to ask you about some of your physical activities. To begin with, I'll be dealing with physical activities not related to work, that is, leisure time activities.

Have you done any of the following in the past 3 months, that is, from [date three months ago] to yesterday? Mark all that apply.

Walking for exercise  
Gardening or yard work  
Swimming  
Bicycling  
Popular or social dance  
Home exercises  
Ice hockey  
Ice skating  
In-line skating or rollerblading  
Jogging or running  
Golfing  
Exercise class or aerobics  
Downhill skiing or snowboarding  
Bowling  
Baseball or softball  
Tennis  
Weight-training  
Fishing  
Volleyball  
Basketball  
Soccer  
Any other  
No physical activity  
Don't know  
Refusal

If "Any other" is chosen as a response  
What was this activity?

...

---

Question PAC\_Q11X

In the past 3 months, did you do any other physical activity for leisure?

- Yes
- No

What was this activity?

...

For each activity identified

---

Question PAC\_Q12

In the past 3 months, how many times did you [participate in identified activity]?

- ... Times
- (MIN: 1) (MAX: 95) for each activity except the following:
- Walking: MAX = 270
- Bicycling: MAX = 200
- Other activities: MAX = 200
- Don't know
- Refusal

About how much time did you spend on each occasion?

- 1 to 15 minutes
  - 16 to 30 minutes
  - 31 to 60 minutes
  - More than one hour
- 

Question PAC\_Q12

In the past 3 months, how many times did you [participate in identified activity]?

- ... Times
  - (MIN: 1) (MAX: 95) for each activity except the following:
  - Walking: MAX = 270
  - Bicycling: MAX = 200
  - Other activities: MAX = 200
  - Don't know
  - Refusal
- 

Question CPA\_Q15

About how many hours a week does he usually take part in physical activity (that makes him out of breath or warmer than usual):

... outside of school while participating in lessons or league or team sports?

- Never
- Less than 2 hours per week
- 2 to 3 hours per week

4 to 6 hours per week  
7 or more hours per week

---

Question CPA\_Q16

About how many hours a week does he usually take part in physical activity (that makes him out of breath or warmer than usual):

... outside of school while participating in unorganized activities, either on his own or with friends?

Never  
Less than 2 hours per week  
2 to 3 hours per week  
4 to 6 hours per week  
7 or more hours per week

Country: Canada  
Survey: Canadian Community Health Survey (CCHS)  
Survey Code: CA 05  
Year: 2007  
Type: Face to Face + Telephone

---

Question PAC\_Q1

Now I'd like to ask you about some of your physical activities. To begin with, I'll be dealing with physical activities not related to work, that is, leisure time activities.

Have you done any of the following in the past 3 months, that is, from [date three months ago] to yesterday?

Walking for exercise  
Gardening or yard work  
Swimming  
Bicycling  
Popular or social dance  
Home exercises  
Ice hockey  
Ice skating  
In-line skating or rollerblading  
Jogging or running  
Golfing  
Exercise class or aerobics  
Downhill skiing or snowboarding  
Bowling  
Baseball or softball  
Tennis  
Weight-training  
Fishing  
Volleyball  
Basketball  
Soccer  
Any other  
No physical activity

What was this activity?

....

---

Question PAC\_Q1X

In the past 3 months, did you do any other physical activity for leisure?

Yes  
No

What was this activity?

...

---

Question PAC\_Q2n

In the past 3 months, how many times did you [participate in identified activity]?

... Times

---

Question PAC\_Q3n

About how much time did you spend on each occasion?

- 1 to 15 minutes
  - 16 to 30 minutes
  - 31 to 60 minutes
  - More than one hour
- 

Question UPE\_Q2A-C

When in-line skating or rollerblading, how often do you wear a helmet?

- Always
- Most of the time
- Rarely
- Never

How often do you wear wrist guards or wrist protectors?

- Always
- Most of the time
- Rarely
- Never

How often do you wear elbow pads?

- Always
  - Most of the time
  - Rarely
  - Never
- 

Question UPE\_Q3A

Earlier, you mentioned going downhill skiing or snowboarding in the past 3 months. Was that:

- ... downhill skiing only?
- ... snowboarding only?
- ... both ?



---

Question UPE\_Q3B

In the past 12 months, did you do any downhill skiing or snowboarding?

- Downhill skiing only
  - Snowboarding only
  - Both
  - Neither
- 

Question UPE\_Q4A-5AB

When downhill skiing, how often do you wear a helmet?

- Always
- Most of the time
- Rarely
- Never

When snowboarding, how often do you wear a helmet?

- Always
- Most of the time
- Rarely
- Never

How often do you wear wrist guards or wrist protectors?

- Always
  - Most of the time
  - Rarely
  - Never
- 

Question UPE\_Q6

In the past 12 months, have you done any skateboarding?

- Yes
  - No
- 

Question STC\_Q1\_6

How often do you jog or do other exercise to deal with stress?

- Often
- Sometimes
- Rarely
- Never



Country: Switzerland  
Survey: Swiss Health Survey  
Survey Code: CH 03  
Year: 2007  
Type: Telephone + self administered

---

Question 46.00

Do you work up a sweat at least once a week as a result of physical exercise in your free time? (e.g. brisk walking, running, cycling, etc)

Yes  
No  
No answer

---

Question 46.01

How many days per week (on average)?

... days per week (1 to 7 days)  
No answer

---

Question 46.30

Do you do regular exercise, follow a fitness programme or practise a sport?

Yes  
No  
No answer

---

Question 46.31

How often do you do regular exercise, follow a fitness programme or practise a sport?

(Almost) every day  
Several times a week  
About once a week  
About once to three times a month  
Less than once a month  
Don't know  
No answer

---

Question 46.32

And what about these physical activities or sports? Do you practise them ...

- Very intensively
  - Pretty intensively
  - With an average intensity
  - Not very intensively
  - Not at all intensively
  - No answer
- 

Question 46.33

On average how many hours per week does that represent?

- ... hours and ... minutes per day
- Don't know
- No answer

Country: Finland  
Survey: FINRISK 2007  
Survey Code: FI 21  
Year: 2007  
Type: Self administered

---

#### Question 79

How much do you exercise and stress yourself physically in your leisure time?  
If it varies much according to different seasons, mark the alternative which best describes the average situation.

In my leisure time I read, watch TV, and work in the household with tasks which do not make me move much and which do not physically tax me.

In my spare time I walk, cycle or exercise otherwise at least 4 hours per week. This includes walking, fishing and hunting, light gardening etc. but excludes travel to work.

In my spare time I exercise to maintain my physical condition, e.g. running, jogging, skiing, gymnastics, swimming, playing ball games or I do heavy gardening or the like for at least 3 hours per week.

In my spare time I regularly exercise several times a week competitive sports such as running, orienteering, skiing, swimming, playing ball games or other heavy sports.

---

#### Question 81

How often do you in your leisure time exercise for at least 20 minutes so that you at least are mildly out of breath and sweaty? (the exercise of travelling to and from work not included)

I have a disability or a disease which does not enable me to exercise  
less than once a week  
once a week  
2 times a week  
3 times a week  
4 times a week  
5 times a week or more often

---

#### Question 82

How long does your usual leisure time activity take?

I do not exercise in my free time  
less than 15 minutes

15 - 29 minutes  
30 - 59 minutes  
one hour or longer

---

### Question 83

How many minutes do you daily walk, cycle or engage in a hobby in your leisure time that requires moving about (yard work or gardening, fixing or cleaning the house)? Do not count in the activity needed at work, travelling to work or leisure time sports.

less than 15 minutes per day  
15-29 minutes per day  
30-44 minutes daily  
45-59 minutes daily  
over an hour per day

---

### Question 85

Evaluate how your leisure time physical activity is divided into different environments.

... % in indoor sport facilities (e.g. swimming hall, gym)  
... % home, indoors or in the yard  
... % outdoors in the artificial surroundings (streets, cycle roads, outdoors sport facilities)  
... % outdoors in the nature near home  
... % outdoors in nature near leisure-time apartment  
... % outdoors in another natural environment

---

### Question 129

Let's assume that you have decided to start a new sport. Your friend recommends you a programme involving practice twice a week an hour at a time. The best time for your friend is in the morning at 7:00-8:00. Considering only the daily rhythm that feels right for you, how do you think you would perform?

I would be in good condition  
I would be in moderate condition  
it would feel quite difficult  
it would feel very difficult

Country: Finland  
Survey: Health Behaviour and Health among the Finnish Adult Population  
Survey Code: FI 22  
Year: 2007  
Type: Self administered

---

Question 74

In your leisure time, how often do you take physical activity for at least 30 min, which makes you at least moderately out of breath and causes you to perspire?

- daily
  - 4-6 times a week
  - 3 times a week
  - 2 times a week
  - once a week
  - 2-3 times a month
  - a few times a year or less
  - I cannot exercise due to an illness or injury
- 

Question 76

How much do you exercise and exert yourself physically in your leisure time? If the amount of exertion varies much depending on the time of the year, choose the alternative that best describes the average situation.

- during my leisure time I read, watch TV and perform chores where I do not need to move much and that do not tire me physically
- during my leisure time I walk, bicycle or exercise otherwise at least 4 hours a week
- during my leisure time, I do active fitness training at least 3 hours a week on average
- during my leisure time, I train actively for competitions several times a week

Country: Ireland  
Survey: Survey of Lifestyles, Attitudes and Nutrition SLAN  
Survey Code: IE 09  
Year: 2007  
Type: Face to Face

---

#### Question B1

We are interested in finding out about the kinds of physical activities that people do as part of their everyday lives.

First, consider a 7 day period (a week). How many times on average do you do the following kinds of exercise for more than 20 minutes during your free time?

Strenuous exercise (heart beats rapidly) (e.g. running, jogging, hurling, camogie, football, soccer, squash, basketball, judo, roller skating, vigorous swimming, vigorous long distance cycling, advanced aerobics)

Moderate exercise (not exhausting) (e.g. fast walking, tennis, badminton, easy swimming, easy cycling, popular and folk dancing, intermediate aerobics, heavy gardening)

Mild exercise (minimal effort) (e.g. yoga, golf, easy walking, fishing from river bank, bowling, beginners aerobics, archery, light gardening)

... times



Country: Italy  
Survey: Aspects of Daily Living  
Survey Code: IT 11  
Year: 2007  
Type: Face to Face + self administered

---

Question 12.3

(If you do not practice any sport, otherwise go to question 12.4)

During your spare time, does it happen to you to practice any type of physical activity such as walking for at least 2 kilometres, swimming, riding a bicycle or other at least a number of times during the year?

- NO
  - YES, once or more than once a week
  - YES, once or more than once a month
  - YES, less frequently
- 

Question 12.4

(If you practice sport regularly or occasionally, otherwise go to question 13.1)

Over the last 12 months, have you practiced sports in places upon payment?

- NO
  - YES
- 

Question 12.5

Over the last 12 months, have you had sports private classes or courses at your or your family's expenses?

- NO
  - YES
- 

Question 12.6

Do you pay a yearly or periodical fee to attend a sports club?

- NO
- YES

Country: Luxembourg  
Survey: PSELL/EU-SILC  
Survey Code: LU 04  
Year: 2007  
Type: Face to Face

---

Question D187

Do you do a physical activity?

- Yes, regularly
  - Yes, sometimes
  - No, because of health problems
  - No, for other reasons
- 

Question D188

Do you do a physical activity or an artistic activity out of your home?

- Yes, regularly
- Yes, sometimes
- No, because of health problems
- No, for other reasons

Country: Netherlands  
Survey: Continuous Quality of Life Survey  
Survey Code: NL 11  
Year: 2007  
Type: Face to Face + self administered

---

Question Wandelen

Do you walk regularly for pleasure?

- Yes
  - No
  - Doesn't know
  - Refuses to answer
- 

Question UuWand

How many hours do you spend walking?

- 5 or more hours a week
  - 1-5 hours a week
  - Less than 1 hour a week
  - Never
  - Doesn't know
  - Refuses to answer
- 

Question Fietsen

Do you cycle regularly for pleasure?

- Yes
  - No
  - Doesn't know
  - Refuses to answer
- 

Question UuFiets

How many hours do you spend cycling?

- 5 or more hours a week
- 1-5 hours a week
- Less than 1 hour a week
- Never
- Doesn't know
- Refuses to answer

Country: Sweden  
Survey: Living Conditions Survey  
Survey Code: SE 08  
Year: 2007  
Type: Face to Face

---

Question 91c

I would now like to ask about how much exercise you get in your leisure time.

Which of these alternatives fit you best?

- Practically no exercise at all
- Some exercise now and then (e.g short walks)
- Exercise regularly about once a week
- Exercise regularly about twice a week
- Exercise regularly and fairly vigorously at least twice a week

Country: Sweden  
Survey: National Survey of Public Health  
Survey Code: SE 09  
Year: 2007  
Type: ???

---

### Question 36

How much have you moved about and exerted yourself physically in your free time during the past 12 months?  
If your activity varies between e.g. summer and winter, try and give an average.  
Note! Mark only one alternative.

#### Free time spent sitting down

You spend time mostly reading, with TV, cinema or other sedentary occupation during your free time. You walk, cycle or move about in other ways for less than 2 hours a week.

#### Moderate exercise in free time

You walk, cycle or move about in other ways for at least two hours a week without sweating. This includes cycling to and from work, other walks, normal gardening, fishing, table-tennis, bowling.

#### Moderate regular exercise in free time

You exercise regularly 1-2 times a week for at least 30 minutes at a time. running, swimming, tennis, badminton or other activity that makes you sweat.

#### Regular exercise and training

You spend time for example running, swimming, tennis, badminton, exercise gymnastics or similar on at least three occasions a week. Each occasion lasts at least 30 minutes.

Country: United Kingdom  
Survey: Health Survey for England  
Survey Code: UK 35  
Year: 2007  
Type: Face to Face + self administered

---

Question SportDo

I would now like to ask you about any sports or exercise activities that you have/(name of child) has done. I will then go on to ask about other active things you/s/he may have done like running about, riding a bike, kicking a ball around and things like that. For the following questions please include any activities done at a nursery or playgroup/don't count any activities done as part of school lessons.

In the last week, that is last (date last week) up to yesterday, have you/has (name of child) done any sports or exercise activities, not counting things done as part of school lessons?

This card shows some of the things you/s/he might have done; please also include any other sports or exercise activities like these.

Yes  
No

---

Question WESpDo

Did you/(name of person) do any of these sports or exercise activities at the weekend?

Yes  
No

Was that on Saturday or Sunday or on both days?

Saturday only  
Sunday only  
Both Saturday and Sunday

---

Question DWESp

Was that on Saturday or Sunday or on both days?

Saturday only  
Sunday only  
Both Saturday and Sunday

---

Question WeSpor

On (Saturday/Sunday) when (you/child's name) did these sports or exercise activities, how long did you/he/she spend (on each day)?

- 15 minutes, less than 30 minutes
  - 30 minutes, less than 1 hour
  - 1 hour, less than 1 1/2 hours
  - 1 1/2 hours, less than 2 hours
  - 2 hours, less than 2 1/2 hours
  - 2 1/2 hours, less than 3 hours
  - 3 hours, less than 3 1/2 hours
  - 3 1/2 hours, less than 4 hours
  - 4 hours or more (please specify how long)
- 

Question WeSpH-WeSpM

More than four hours THEN

How long did (you/child's name) spend doing these sports or exercise activities on (that/each) day?

RECORD HOURS SPENT BELOW

...

RECORD HERE MINUTES DOING SPORTS OR EXERCISE ACTIVITIES.

...

---

Question DaySp

Still thinking about last week. On how many of the weekdays did (you/child's name) do any of these sports or exercise activities? Please remember not to count things done as part of school lessons.

- None in last week
  - 1 day
  - 2 days
  - 3 days
  - 4 days
  - 5 days
- 

Question WkSpor

On each weekday that (you/he/she) did these sports or exercise activities, how long did you/he/she spend?

- Less than 5 minutes
- 15 minutes, less than 30 minutes
- 30 minutes, less than 1 hour

- 1 hour, less than 1 1/2 hours
  - 1 1/2 hours, less than 2 hours
  - 2 hours, less than 2 1/2 hours
  - 2 1/2 hours, less than 3 hours
  - 3 hours, less than 3 1/2 hours
  - 3 1/2 hours, less than 4 hours
  - 4 hours or more (please specify how long)
- 

Question WkSpH-WkSpM

4 hours or more THEN

How long did (you/child's name) spend doing these sports or exercise activities on each weekday?

RECORD HOURS SPENT BELOW.

...

RECORD HERE MINUTES SPENT DOING SPORTS OR EXERCISE ACTIVITIES.

...

---

Question DaysTot

Now thinking about all the activities during the past week you have just told me about including any walking, (gardening, housework), sports or other active things. On how many days in the last week in total did (you/child's name) do any of these activities not counting things done as part of school lessons?

- None
- One day
- Two days
- Three days
- Four days
- Five days
- Six days
- Every day



Country: Belgium  
Survey: Health Interview Survey  
Survey Code: BE 06  
Year: 2008  
Type: Self administered

---

Question PA08

Leisure physical activities

The next two questions are about your physical activity during leisure time only

Which proposition best describes your leisure activities during the past year?

- Intensive training and competitive sports more than once a week
  - Jogging, other leisure sport or gardening, at least 4 hours a week
  - Jogging, other leisure sport or gardening, less than 4 hours a week
  - Walking, cycling or other mild activity, at least 4 hours a week
  - Walking, cycling, other mild activity, less than 4 hours a week.
  - Reading, TV or other sedentary activity
  - I don't know
- 

Question PA09

Do you practice, at least once a week, during your leisure time, a physical activity such as jogging, cycling, etc. for long enough to perspire?

- Yes: ... number of days/week
- No
- I don't know

Country: France  
Survey: Disabilities and health survey, household part 2008  
Survey Code: FR 20  
Year: 2008  
Type: Face to Face

---

Question MSPORT

In the past 12 months, have you practiced a sport [whether or not with a sports club]? (include hiking and sports walking, dance, etc)

Yes  
No  
Doesn't know

Was this:

Regularly throughout the year  
Occasionally throughout the year  
Only at certain periods or during holidays  
Occasionally or rarely  
Doesn't know

---

Question MBRIJAR

In the past 12 months have you done any D.I.Y. or gardening? (apart from very small jobs or repairs)

Yes  
No  
Doesn't know

Was this:

Regularly throughout the year  
Occasionally throughout the year  
Only at certain periods or during **holidays**  
Occasionally or rarely  
Doesn't know

Country: Romania  
Survey: Health Interview Survey  
Survey Code: RO 02  
Year: 2008  
Type: Face to Face + self administered

---

#### Question 114

##### Physical activity

Now I would like to ask you about the time you spent on physical activity during the last 7 days. Please answer each question even if you do not see yourself as an active person.

Think of any physical activity, such as: housekeeping or gardening, activities at work, physical exercises, walks or sports.

I will ask separate questions about intense activities, moderate activities and walking. Let us talk first about intense physical activities.

Intense physical activities involve high physical effort and heavier breathing than usual. They can include activities such as: lifting heavy objects, digging, wood cutting, working in constructions, going up the stairs for work, gymnastics or bicycle riding at high speed.

Think only of those physical activities that you performed for at least 10 minutes.

During the last 7 days, on how many days did you have intense physical activities?

total days with vigorous physical activities: ... days week

I don't know/I'm not sure

Refusal

---

#### Question 115

On the overall, during these last 7 days, how much time did you spend on intense physical activities?

total time of intense physical activities/week:

... hours ... minutes/week

I don't know/I'm not sure

Refusal

---

#### Question 116

Now I would like to ask you about the time you spend on moderate physical activities.

A moderate physical activity is an activity that involves moderate physical effort and that makes you breathe a bit heavier than usual and may include activities such as: lifting of light weights, sweeping the floor, washing windows, riding a

bicycle (at moderate speed), tennis or swimming. Do not include strolls.  
Now think of only those moderate physical activities that you performed for at least 10 minutes.

During the last 7 days, on how many days did you have moderate physical activities?

total days with moderate physical activities: ... days/week  
I don't know/I'm not sure  
Refusal

---

#### Question 117

On the overall, during these last 7 days, how much time did you spend on moderate physical activities?

total time of moderate physical activities/week:  
... hours ... minutes/week  
I don't know/I'm not sure  
Refusal

---

#### Question 118

Let us talk about the time spent on walking or strolling.  
Strolling is a separate activity and includes walking to or from work/school, walking from one place to another or any other strolls you take as physical exercises, sports or only for recreation.  
Now think only of those strolls you took for at least 10 minutes.

During the last 7 days, on how many days did you have strolls or walks, for at least 10 minutes?

total days with strolls: ... days/week  
I don't know/I'm not sure  
Refusal

---

#### Question 119

On the overall, during these last 7 days, how much time did you spend on walking or strolling?

total strolling time/day: ... hours ... minutes/day  
I don't know/I'm not sure  
Refusal

Country: United Kingdom  
Survey: Health Survey for England  
Survey Code: UK 36  
Year: 2008  
Type: Face to Face

---

Question SportDo

I would now like to ask you about any sports or exercise activities that you have/(name of child) has done. I will then go on to ask about other active things you/s/he may have done like running about, riding a bike, kicking a ball around and things like that. For the following questions please include any activities done at a nursery or playgroup/don't count any activities done as part of school lessons.

In the last week, that is last (date last week) up to yesterday, have you/has (name of child) done any sports or exercise activities, not counting things done as part of school lessons?

This card shows some of the things you/s/he might have done; please also include any other sports or exercise activities like these.

Yes  
No

---

Question WESpDo

Did you/(name of person) do any of these sports or exercise activities at the weekend?

Yes  
No

Was that on Saturday or Sunday or on both days?

Saturday only  
Sunday only  
Both Saturday and Sunday

---

Question DWESp

Was that on Saturday or Sunday or on both days?

Saturday only  
Sunday only  
Both Saturday and Sunday

---

Question WeSpor

On (Saturday/Sunday) when (you/child's name) did these sports or exercise activities, how long did you/he/she spend (on each day)?

- 15 minutes, less than 30 minutes
  - 30 minutes, less than 1 hour
  - 1 hour, less than 1 1/2 hours
  - 1 1/2 hours, less than 2 hours
  - 2 hours, less than 2 1/2 hours
  - 2 1/2 hours, less than 3 hours
  - 3 hours, less than 3 1/2 hours
  - 3 1/2 hours, less than 4 hours
  - 4 hours or more (please specify how long)
- 

Question WeSpH-WeSpM

More than four hours THEN

How long did (you/child's name) spend doing these sports or exercise activities on (that/each) day?

RECORD HOURS SPENT BELOW

...

RECORD HERE MINUTES DOING SPORTS OR EXERCISE ACTIVITIES.

...

---

QuestionDaySp

Still thinking about last week. On how many of the weekdays did (you/child's name) do any of these sports or exercise activities? Please remember not to count things done as part of school lessons.

- None in last week
  - 1 day
  - 2 days
  - 3 days
  - 4 days
  - 5 days
- 

Question WkSpor

On each weekday that (you/he/she) did these sports or exercise activities, how long did you/he/she spend?

- Less than 5 minutes
- 15 minutes, less than 30 minutes
- 30 minutes, less than 1 hour

- 1 hour, less than 1 1/2 hours
  - 1 1/2 hours, less than 2 hours
  - 2 hours, less than 2 1/2 hours
  - 2 1/2 hours, less than 3 hours
  - 3 hours, less than 3 1/2 hours
  - 3 1/2 hours, less than 4 hours
  - 4 hours or more (please specify how long)
- 

Question WkSpH-WkSpM

4 hours or more THEN

How long did (you/child's name) spend doing these sports or exercise activities on each weekday?

RECORD HOURS SPENT BELOW.

...

RECORD HERE MINUTES SPENT DOING SPORTS OR EXERCISE ACTIVITIES.

...

---

Question DaysTot

Now thinking about all the activities during the past week you have just told me about including any walking, (gardening, housework), sports or other active things. On how many days in the last week in total did (you/child's name) do any of these activities not counting things done as part of school lessons?

- None
- One day
- Two days
- Three days
- Four days
- Five days
- Six days
- Every day

International Survey Items concerning

**Sedentary Behaviour**

1995 - 2008



## TABLE OF CONTENTS

|                         |    |
|-------------------------|----|
| <b>1995</b>             |    |
| Portugal – PT 01        | 2  |
| <b>1998</b>             |    |
| United Kingdom – UK 09  | 3  |
| <b>1999</b>             |    |
| Italy – IT 01           | 5  |
| <b>2000</b>             |    |
| International - EUPASS  | 6  |
| <b>2001</b>             |    |
| Croatia – HR 02         | 7  |
| Macedonia – MK 03       | 8  |
| Slovenia – SI 01        | 9  |
| <b>2002</b>             |    |
| International – INT 08  | 10 |
| Malta – MT 01           | 11 |
| Slovakia – SK 02        | 12 |
| <b>2004</b>             |    |
| Belgium – BE 05         | 13 |
| International – FINBALT | 14 |
| <b>2005</b>             |    |
| Denmark – DK 03         | 15 |
| France – FR 14          | 16 |
| Portugal – PT 05        | 17 |
| United Kingdom – UK 31  | 18 |
| <b>2006</b>             |    |
| Serbia – CS 01          | 20 |
| Estonia – EE 08         | 21 |
| France – FR 18          | 22 |
| United Kingdom – UK 33  | 23 |
| <b>2007</b>             |    |
| Finland – FI 21         | 25 |
| Iceland – IS 04         | 26 |
| United Kingdom – UK 35  | 27 |
| <b>2008</b>             |    |
| United Kingdom – UK 36  | 29 |

Country: Portugal  
Survey: National Health Survey  
Survey Code: PT 01  
Year: 1995  
Type: Face to Face

---

Question 2

DO YOU DO THINGS THAT REQUIRE LITTLE PHYSICAL  
ACTIVITY, SUCH AS READING, KNITTING, WATCHING TV  
ETC.?

Yes  
No  
Don't know

---

Question 3

HOW MANY DAYS PER WEEK?

... days  
Don't know

---

Question 4

AND FOR HOW MANY MINUTES EACH DAY ON AVERAGE?

... minutes  
Don't know

Country: United Kingdom  
Survey: Health Survey for England  
Survey Code: UK 09  
Year: 1998  
Type: Face to Face + self administered

---

Question 153

Did you spend time sitting down doing any things like these for at least 5 minutes a time at the weekend, that is last Saturday and Sunday?

Show card J

Yes  
No

---

Question 154

Was that on Saturday or Sunday or on both days?

Saturday only  
Sunday only  
Both Saturday and Sunday

---

Question 155

On Saturday/Sunday when you spent time sitting down doing things like these, how long did you spend daily?

Show card G

5 minutes, less than 15 minutes  
15 minutes, less than 30 minutes  
30 minutes, less than 1 hour  
1 hour, less than 1½ hours  
1½ hours, less than 2 hours  
2 hours, less than 2½ hours  
2½ hours, less than 3 hours  
3 hours, less than 3½ hours  
3½ hours, less than 4 hours  
4 hours or more

---

Question 156

How long did you spend sitting down doing things like these?

... hours ... minutes

---

Question 157

On how many weekdays last week did you spend time sitting down doing things like the ones on this card for at least 5 minutes a time, (not counting things you did as part of school lessons)?

- None in last week
  - 1 day
  - 2 days
  - 3 days
  - 4 days
  - 5 days
- 

Question 158

On each weekday that you spent time sitting down doing things like these, how long did you spend?

Show card G

- 5 minutes, less than 15 minutes
  - 15 minutes, less than 30 minutes
  - 30 minutes, less than 1 hour
  - 1 hour, less than 1½ hours
  - 1½ hours, less than 2 hours
  - 2 hours, less than 2½ hours
  - 2½ hours, less than 3 hours
  - 3 hours, less than 3½ hours
  - 3½ hours, less than 4 hours
  - 4 hours or more
- 

Question 159

How long did you spend sitting down doing things like these?

s

... hours ... minutes

---

Country: Italy  
Survey: Health Conditions and the Use of Health Services  
Survey Code: IT 01  
Year: 1999  
Type: Face to Face

---

Question 15.5

Is your free time usually spent doing a sedentary activity (watching television, reading magazines and/or books, etc..)?

- No
- Yes, over 4 hours per week
- Yes, 4 hours per week
- Yes, less than 4 hours per week

Country: International  
Survey: European Physical Activity Surveillance System (EUPASS)  
Survey Code:  
Year: 2000  
Type: Telephone

---

Question B4a

The next questions are about the time you spend sitting each day while at work, at home, while doing course work and during leisure time. This may include time spent sitting at a desk, visiting friends, reading or sitting or lying down to watch television.

During the last 7 days, how much time in total did you usually spend sitting on a week day?

\_\_\_\_ hours \_\_\_\_ minutes

---

Question B4b

[Interviewer clarification: Include time spent lying down (awake) as well as sitting]

[Interviewer probe: An average time per day is being sought. If the respondent can't answer because the pattern of time spent varies widely from day to day, ask:  
How much time in total would you spend sitting in a usual week?

\_\_\_\_ hours \_\_\_\_ minutes per week [skip to end]

During the last 7 days, how much time in total did you usually spend sitting on a weekend day?

\_\_\_\_ hours \_\_\_\_ minutes

Country: Croatia  
Survey: Health Interview Survey  
Survey Code: HR 02  
Year: 2001  
Type: Face to Face

---

Question 91

Now think about how much time you spent sitting in the last 7 days. Include time spent at work, at home, during education and leisure time. This includes time while sitting at a desk, visiting friends, reading or sitting/lying down to watch television.

How much time, you usually spend sitting, at one average weekday during the last week?

... hours ... minutes

Country: Macedonia  
Survey: EUROHIS of Republic of Macedonia  
Survey Code: MK 03  
Year: 2001  
Type: Face to Face

---

Question 91

Now think about the time you spent sitting on weekdays during the past 7 days. Include time spent at work, at home, while doing course work and during leisure time. This may include time spent sitting at a desk, visiting friends, traveling on a bus, reading or sitting or lying down to watch television.

During the past 7 days, how much time in total did you usually spend sitting on a weekday?

... hours ... minutes

Interviewer probe: An average time per day is being sought. If the respondent can't answer because the pattern of time spent varies widely from day to day, ask: "What is the total amount of time you spent sitting last Wednesday?"

... hours ... minutes



Country: Slovenia  
Survey: CINDI Health Monitor Questionnaire  
Survey Code: SI 01  
Year: 2001  
Type: ???

---

Question 68

On any one weekday during the last 7 days how much time did you usually spend sitting? Include time spent sitting at work, when travelling or visiting friends, and when sitting/lying down while reading or watching television.

... hours ... minutes/day

(An average time per day is being sought. If you can't answer because the pattern of time spent varied widely from day to day what was the total amount of time you spent sitting last Wednesday?)

Country: International  
Survey: World Health Surveys-WHS-Consolidated multi-country questionnaire  
Survey Code: INT 08  
Year: 2002  
Type: Face to Face

---

Question 4403

Next question (4403) is about the time you spent sitting while at work, at home, while doing course work and during leisure time. This includes time spent sitting at a desk, visiting friends, reading travelling on a bus or sitting or lying down to watch television.

During the last 7days, how much time in total did you usually spend on one of those days sitting ?

Hours/minutes

Travel-related Activity

Now I am going to ask you about the way you travel to and from places (work, market church etc.).

Country: Malta  
Survey: First National Health Interview Survey  
Survey Code: MT 01  
Year: 2002  
Type: Face to Face

---

Question 59

Now think about the time you spend sitting on weekdays during the past 7 days.

Include time spent at work, at home, while doing course work and during leisure time.

This may include time spent sitting at a desk, visiting friends, travelling in a car or bus, reading or sitting or lying down to watch television.

During the past 7 days, how much time in total did you usually spend sitting on a weekday (Do not include Saturdays and Sundays and the time spent sleeping)?

... hours ... minutes

Country: Slovakia  
Survey: Health Monitor Survey  
Survey Code: SK 02  
Year: 2002  
Type: Face to Face

---

Question 6.10

How much time do you spend sitting on a usual week day? Include sitting at the desk, visiting friends, reading, travelling on a bus or sitting or lying down to watch television.

... hours ... minutes

Country: Belgium  
Survey: Health Interview Survey  
Survey Code: BE 05  
Year: 2004  
Type: Self administered

---

Question PA10

Sitting

During the last 7 days, how much time did you spend sitting on a week day?

... hour  
... minutes/day  
I don't know

Country: International (Finland, Baltic States)

Survey: FINBALT Health Monitor

Survey Code:

Year: 2004

Type: Self administered

---

Question 31

How much time do you spend sitting on a usual week day? Include sitting at the desk, visiting friends, reading, travelling on a bus or sitting or lying down to watch television.

... hours ... minutes

Country: Denmark  
Survey: The Danish Health Interview Survey  
Survey Code: DK 03  
Year: 2005  
Type: Face to Face

---

Question 23c

How much time during the last 7 days have you spent sitting while at work, at home, while doing course work and during leisure time? This includes time spent sitting at a desk, visiting friends, reading, travelling on a bus or sitting or lying down to watch television

Typical time per day:

Hours: ...

Minutes: ...

Country: France  
Survey: Health Barometer  
Survey Code: FR 14  
Year: 2005  
Type: Telephone

---

#### Question Q80

Finally, let us look at how long you spent seated during one day of the week (weekend excluded) during the past seven days. This includes time spent seated at work, at home, when studying and during your free time. This can be time seated at a desk, on transport, at friends, when reading, when seated or lying down to watch television, or when using a computer.

During the past seven days, how long did you spend seated during an average day?

... hours and ... minutes a day

---

#### Question Q81

Finally, let us look at how long you spent seated during one day of the week (weekend excluded) during the past seven days. This includes time spent seated at work, at home, when studying and during your free time. This can be time seated at a desk, on transport, at friends, when reading, when seated or lying down to watch television, or when using a computer.

During the past seven days, how long did you spend seated during an average day?

... hours and ... minutes a day

---

#### Question Q91

Let us finally look at the time you spent seated. This includes time spent seated at work, at home, when studying and during your free time. It can be time spent seated at a desk, on transport, at friends' houses, when reading, when seated or lying watching television, or using a computer

Yesterday, how long did you spend seated?

... hours and ... minutes



Country: Portugal  
Survey: Fourth National Health Interview Survey  
Survey Code: PT 05  
Year: 2005  
Type: Face to Face

---

Question 0

ARE YOU] IS HE/SHE] ALWAYS BEDRIDDEN, SITTING ON A CHAIR ALL DAY OR CONFINED TO YOUR HOUSE?

Yes  
No  
Don't know

---

Question 10

THINK ABOUT THE TIME SPENT ON WEEKDAYS IN THE LAST 7 DAYS. INCLUDE TIME SPENT AT WORK, AT HOME, DOING USUAL TASKS AND LEISURE TIME. INCLUDE ALSO THE TIME SPENT ON THINGS LIKE SITTING AT A DESK, VISITING FRIENDS, READING AND SITTING OR RESTING WHILE WATCHING TV OR LISTENING TO MUSIC.  
(IT COMPREHENDS THE TIME SPENT LAYING DOWN WHILE AWAKE)

IN TOTAL, HOW MUCH TIME DID YOU/HE/SHE USUALLY SPEND SITTING IN ONE OF THESE WEEKDAYS, IN THE LAST 7 DAYS?

... h ... m per day  
Don't know because the pattern varies a lot day to day

---

Question 11

IN TOTAL, HOW MUCH TIME DID YOU/HE/SHE SPEND SITTING LAST WEDNESDAY?

... h ... m on Wednesday  
Don't know

Country: United Kingdom  
Survey: Health Survey for England  
Survey Code: UK 31  
Year: 2005  
Type: Face to Face

---

Question WESitDo

Now I'd like to know about when you/(name of child) spend time sitting down doing things like the ones on this card. Did you/s/he spend time sitting down doing any things like these for at least 5 minutes a time at the weekend

Yes  
No

---

Question DSitWE

Was that on Saturday or Sunday or on both days?

Saturday only  
Sunday only  
Both Saturday and Sunday

---

Question SitWE

When you/(name of child) spent time sitting down doing things like these, how long did you/s/he spend on each day Please give an answer from this card.

Less than 5 minutes  
5 minutes, less than 15 minutes  
15 minutes, less than 30 minutes  
30 minutes, less than 1 hour  
1 hour, less than 1 1/2 hours  
1 1/2 hours, less than 2 hours  
2 hours, less than 2 1/2 hours  
2 1/2 hours, less than 3 hours  
3 hours, less than 3 1/2 hours  
3 1/2 hours, less than 4 hours  
4 hours or more (please specify how long)

---

Question WeSith

How long did you/(name of child) spend sitting down doing things like these?

...

---

Question WkSitDo

On how many weekdays last week did you/(name of child) spend time sitting down doing things like the ones on this card for at least 5 minutes a time?

None in last week,  
1 day,  
2 days,  
3 days,  
4 days,  
5 days.

---

Question WkSitHrs

On each weekday that you/(name of child) spent time sitting down doing things like these, how long did you/s/he spend? Please give an answer from this card:

Less than 5 minutes  
5 minutes, less than 15 minutes  
15 minutes, less than 30 minutes  
30 minutes, less than 1 hour  
1 hour, less than 1 1/2 hours  
1 1/2 hours, less than 2 hours  
2 hours, less than 2 1/2 hours  
2 1/2 hours, less than 3 hours  
3 hours, less than 3 1/2 hours  
3 1/2 hours, less than 4 hours  
4 hours or more (please specify how long)

---

Question WkSitH

How long did you/(name of child) spend sitting down doing things like these?

...

Country: Serbia  
Survey: National Health Survey, Serbia 2006  
Survey Code: CS 01  
Year: 2006  
Type: Face to Face + self administered

---

Question SV8

Now think about time you spent sitting during the work days in the last 7 days. This includes sitting at school/work and at home. This includes sitting at a desk, table, sitting/lying while watching TV, reading, visiting friends, travelling by car, bus.

How many hours did you spend sitting during the work days in the last week?

... hours ... minutes

---

Question SV12

Now think about time you spent sitting during the work days in the last 7 days. This includes sitting at school/work and at home. This includes sitting at a desk, table, sitting/lying while watching TV, reading, visiting friends, travelling by car, bus.

How many hours did you spend sitting during the work days in the last week?

... hours ... minutes

Country: Estonia  
Survey: Estonian Health Interview Survey 2006  
Survey Code: EE 08  
Year: 2006  
Type: Face to Face

---

Question T20

Are you physically inactive for more than two hours in a row (for example reading, sitting at the computer, watching TV)?

Yes  
No

---

Question T21

How many hours a week are you usually physically inactive (for example reading, sitting at the computer, watching TV)?

... hours

Country: France  
Survey: National survey on nutrition and health (ENNS)  
Survey Code: FR 18  
Year: 2006  
Type: Face to Face

---

#### Question E53

The following questions concern the physical activity and sedentariness of your child during the past week, that is, on the seven days including yesterday.

It is possible that you do not know exactly how to answer the questions; try to be as close as possible to what you have seen.

II. During the past week, how much time did your child spend watching television in all (video cassette and DVD included)?

For children attending neither school or crèche, or interviewed during holidays

Total time per day: ... Hours ... minutes

Refusal

Doesn't know

---

#### Question E54

The following questions concern the physical activity and sedentariness of your child during the past week, that is, on the seven days including yesterday.

It is possible that you do not know exactly how to answer the questions; try to be as close as possible to what you have seen.

II. During the past week, how much time did your child spend watching television in all (video cassette and DVD included)?

For children attending school (or a crèche)

School days (Monday, Tuesday, Thursday, Friday) ... Hours ... minutes

Days with little school (Wednesday or Saturday) ... Hours ... minutes

Days with no school (Wednesday or Saturday, Sunday) ... Hours ... minutes

Refuses to answer

Doesn't know

Country: United Kingdom  
Survey: Health Survey for England  
Survey Code: UK 33  
Year: 2006  
Type: Face to Face

---

Question WESitDo-DSit

Now I'd like to know about when you/(name of child) spend time sitting down doing things like the ones on this card. Did you/s/he spend time sitting down doing any things like these for at least 5 minutes a time at the weekend

Yes  
No

Was that on Saturday or Sunday or on both days?

Saturday only  
Sunday only  
Both Saturday and Sunday

---

Question SitWE-WeSitH

When you/(name of child) spent time sitting down doing things like these, how long did you/s/he spend on each day

Less than 5 minutes  
5 minutes, less than 15 minutes  
15 minutes, less than 30 minutes  
30 minutes, less than 1 hour  
1 hour, less than 1 1/2 hours  
1 1/2 hours, less than 2 hours  
2 hours, less than 2 1/2 hours  
2 1/2 hours, less than 3 hours  
3 hours, less than 3 1/2 hours  
3 1/2 hours, less than 4 hours  
4 hours or more, please specify how long: ...

How long did you/(name of child) spend sitting down doing things like these?  
RECORD HOURS SPENT BELOW.

...

RECORD HERE MINUTES SPENT SITTING DOWN DOING THINGS LIKE THESE

...

---

Question WkSitDo

On how many weekdays last week did you/(name of child) spend time sitting down doing things like the ones on this card for at least 5 minutes a time?

- None in last week,
- 1 day,
- 2 days,
- 3 days,
- 4 days,
- 5 days.

---

Question WkSitHrs

On each weekday that you/(name of child) spent time sitting down doing things like these, how long did you/s/he spend?

- Less than 5 minutes
- 5 minutes, less than 15 minutes
- 15 minutes, less than 30 minutes
- 30 minutes, less than 1 hour
- 1 hour, less than 1 1/2 hours
- 1 1/2 hours, less than 2 hours
- 2 hours, less than 2 1/2 hours
- 2 1/2 hours, less than 3 hours
- 3 hours, less than 3 1/2 hours
- 3 1/2 hours, less than 4 hours
- 4 hours or more, please specify how long: ...

How long did you/(name of child) spend sitting down doing things like these?

...



Country: Finland  
Survey: FINRISK 2007  
Survey Code: FI 21  
Year: 2007  
Type: Self administered

---

Question 86

How many hours on average do you sit in a weekday?

During the workday in office or equivalent ... t ... min  
At home watching television or videos ... t ... min  
At home at a computer ... t ... min  
In a vehicle ... t ... min  
Elsewhere ... t ... min

Country: Iceland  
Survey: Health and wellbeing of Icelanders  
Survey Code: IS 04  
Year: 2007  
Type: Self administered

---

Question 53

As a general rule, how much time a day did you spend sitting down in the previous week. This applies only to weekdays. Include the time that you spend sitting down at work, at home and during leisure. (This could include time spent sitting down at a desk, dinner table, visiting, reading or in front of the television or computer.)

- Less than one hour a day
- About 1 hour a day
- About 2-3 hours a day
- About 4-5 hours a day
- About 6-7 hours a day
- About 8-10 hours a day
- About 11-13 hours a day
- About 14-16 hours a day
- More than 16 hours a day

Country: United Kingdom  
Survey: Health Survey for England  
Survey Code: UK 35  
Year: 2007  
Type: Face to Face + self administered

---

Question WESitDo-DSit

Now I'd like to know about when (you/child's name) spend(s) time sitting down doing things like the ones on this card. Did (you/child's name) spend time sitting down doing any things like these for at least 5 minutes a time at the weekend?

Yes  
No

Was that on Saturday or Sunday or on both days?

Saturday only  
Sunday only  
Both Saturday and Sunday

---

Question SitWE-WeSitH

On (Saturday/Sunday) when (you/child's name) spent time sitting down doing things like these, how long did (you/he/she) spend on each day.

15 minutes, less than 30 minutes  
30 minutes, less than 1 hour  
1 hour, less than 1 1/2 hours  
1 1/2 hours, less than 2 hours  
2 hours, less than 2 1/2 hours  
2 1/2 hours, less than 3 hours  
3 hours, less than 3 1/2 hours  
3 1/2 hours, less than 4 hours  
4 hours or more (please specify how long)

More than four hours THEN

How long did (you/child's name) spend sitting down doing things like these on (each/that) day?

RECORD HOURS SPENT BELOW.

...

RECORD HERE MINUTES SPENT SITTING DOWN DOING THINGS LIKE THESE

...

---

Question WkSitDo

On how many weekdays last week did (you/child's name) spend time sitting down doing things like the ones on this card for at least 5 minutes a time not counting things (you/he/she) did as part of school lessons?

- None in last week
  - 1 day
  - 2 days
  - 3 days
  - 4 days
- 

Question WkSitHrs

On each weekday that (you/child's name) spent time sitting down doing things like these, how long did (you/he/she) spend?

- 15 minutes, less than 30 minutes
- 30 minutes, less than 1 hour
- 1 hour, less than 1 1/2 hours
- 1 1/2 hours, less than 2 hours
- 2 hours, less than 2 1/2 hours
- 2 1/2 hours, less than 3 hours
- 3 hours, less than 3 1/2 hours
- 3 1/2 hours, less than 4 hours
- 4 hours or more (please specify how long)

More than four hours THEN

How long did (you/child's name) spend sitting down doing things like these?

...

Country: United Kingdom  
Survey: Health Survey for England  
Survey Code: UK 36  
Year: 2008  
Type: Face to Face

---

Question WESitDo-DSitWESitDo

Now I'd like to know about when (you/child's name) spend(s) time sitting down doing things like the ones on this card. Did (you/child's name) spend time sitting down doing any things like these for at least 5 minutes a time at the weekend?

Yes  
No

Was that on Saturday or Sunday or on both days?

Saturday only  
Sunday only  
Both Saturday and Sunday

---

Question SitWE-WeSitH

On (Saturday/Sunday) when (you/child's name) spent time sitting down doing things like these, how long did (you/he/she) spend on each day.

15 minutes, less than 30 minutes  
30 minutes, less than 1 hour  
1 hour, less than 1 1/2 hours  
1 1/2 hours, less than 2 hours  
2 hours, less than 2 1/2 hours  
2 1/2 hours, less than 3 hours  
3 hours, less than 3 1/2 hours  
3 1/2 hours, less than 4 hours  
4 hours or more (please specify how long)

More than four hours THEN

How long did (you/child's name) spend sitting down doing things like these on (each/that) day?

RECORD HOURS SPENT BELOW.

...

RECORD HERE MINUTES SPENT SITTING DOWN DOING THINGS LIKE THESE

...

---

Question WkSitDo

On how many weekdays last week did (you/child's name) spend time sitting down doing things like the ones on this card for at least 5 minutes a time not counting things (you/he/she) did as part of school lessons?

None in last week

1 day

2 days

3 days

4 days

---

Question WkSitHrs

On each weekday that (you/child's name) spent time sitting down doing things like these, how long did (you/he/she) spend?

15 minutes, less than 30 minutes

30 minutes, less than 1 hour

1 hour, less than 1 1/2 hours

1 1/2 hours, less than 2 hours

2 hours, less than 2 1/2 hours

2 1/2 hours, less than 3 hours

3 hours, less than 3 1/2 hours

3 1/2 hours, less than 4 hours

4 hours or more (please specify how long)

More than four hours THEN

How long did (you/child's name) spend sitting down doing things like these?

...

International Survey Items concerning  
**generic and other physical activity questions**

1992 - 2008

## TABLE OF CONTENTS

|                        |    |
|------------------------|----|
| <b>1992</b>            |    |
| United Kingdom – UK 03 | 3  |
| <b>1994</b>            |    |
| Denmark – DK 01        | 6  |
| <b>1995</b>            |    |
| Portugal – PT 01       | 7  |
| United Kingdom – UK 10 | 9  |
| <b>1996</b>            |    |
| Finland – FI 05        | 12 |
| International – INT 03 | 13 |
| Luxembourg – LU 01     | 14 |
| <b>1997</b>            |    |
| Belgium – BE 01        | 15 |
| Switzerland – CH 01    | 16 |
| <b>1998</b>            |    |
| Germany – DE 05        | 17 |
| Ireland – IE 01        | 18 |
| United Kingdom – UK 02 | 20 |
| United Kingdom – UK 09 | 23 |
| United Kingdom – UK 13 | 28 |
| <b>1999</b>            |    |
| Estonia – EE 05        | 30 |
| Italy – IT 01          | 31 |
| Lithuania – LT 01      | 32 |
| Latvia – LV 01         | 33 |
| Portugal – PT 03       | 34 |
| <b>2000</b>            |    |
| Canada – CA 01         | 35 |
| Cyprus – CY 02         | 36 |
| Denmark – DK 02        | 37 |
| Estonia – EE 06        | 38 |
| Finland – FI 01        | 39 |
| Finland – FI 03        | 40 |
| Hungary – HU 01        | 42 |
| International – EUPASS | 43 |
| Italy – IT 03          | 48 |
| Romania – RO 01        | 49 |
| United Kingdom – UK 12 | 50 |
| United States – US 01  | 52 |
| <b>2001</b>            |    |
| Australia – AU 01      | 55 |
| Belgium – BE 02        | 57 |
| Finland – FI 06        | 59 |
| Finland – FI 09        | 60 |
| Croatia – HR 02        | 62 |
| Iceland – IS 03        | 64 |
| Italy – IT 04          | 65 |
| Macedonia – MK 03      | 66 |
| Netherlands – NL 02    | 68 |
| Netherlands – NL 03    | 69 |
| Slovenia – SI 02       | 71 |
| <b>2002</b>            |    |
| Switzerland – CH 02    | 73 |
| Finland – FI 07        | 75 |
| Finland – FI 13        | 76 |
| France – FR 09         | 77 |
| Ireland – IE 03        | 78 |
| International – INT 06 | 79 |
| International – INT 08 | 81 |
| Italy – IT 05          | 83 |
| Lithuania – LT 02      | 84 |
| Latvia – LV 03         | 86 |
| Malta – MT 01          | 88 |
| Netherlands – NL 05    | 91 |
| Denmark – REC 02       | 92 |
| Slovakia – SK 02       | 95 |



|                         |     |
|-------------------------|-----|
| United Kingdom – UK 07  | 97  |
| United Kingdom – UK 28  | 98  |
| <b>2003</b>             |     |
| Canada – CA 02          | 101 |
| Spain – ES 03           | 102 |
| Finland – FI 10         | 103 |
| Finland – FI 11         | 104 |
| Croatia – HR 03         | 106 |
| Croatia – HR 04         | 110 |
| Hungary – HU 05         | 111 |
| Latvia – LV 02          | 113 |
| Netherlands – NL 08     | 114 |
| Sweden – SE 03          | 115 |
| Turkey – TR 01          | 116 |
| Turkey – TR 05          | 117 |
| <b>2004</b>             |     |
| Australia – AU 03       | 121 |
| Belgium – BE            | 122 |
| Estonia – EE 07         | 124 |
| Finland – FI 12         | 125 |
| International – FINBALT | 126 |
| Netherlands – NL 07     | 128 |
| Sweden – SE 04          | 129 |
| <b>2005</b>             |     |
| Canada – CA 03          | 130 |
| Germany – DE 07         | 131 |
| Denmark – DK 03         | 132 |
| Finland – FI 19         | 134 |
| Finland – FI 20         | 135 |
| France – FR 14          | 137 |
| Italy – IT 08           | 140 |
| Lithuania – LT 06       | 141 |
| Poland – PL 05          | 143 |
| Portugal – PT 05        | 144 |
| Sweden – SE 05          | 147 |
| United Kingdom – UK 31  | 148 |
| <b>2006</b>             |     |
| Austria – AT 06         | 150 |
| Serbia – CS 01          | 153 |
| Germany – DE 08         | 156 |
| Estonia – EE 08         | 157 |
| Spain – ES 06           | 160 |
| France – FR 18          | 161 |
| Lithuania – LT 05       | 165 |
| International – REC 04  | 166 |
| United Kingdom – UK 33  | 168 |
| United States – US 04   | 171 |
| <b>2007</b>             |     |
| Australia – AU 04       | 172 |
| Canada – CA 04          | 175 |
| Canada – CA 05          | 176 |
| Switzerland – CH 03     | 177 |
| Germany – DE 09         | 178 |
| Finland – FI 21         | 181 |
| Finland – FI 22         | 182 |
| Finland – FI 23         | 183 |
| Ireland – IE 09         | 185 |
| Iceland – IS 04         | 189 |
| Luxembourg – LU 04      | 192 |
| Sweden – SE 09          | 193 |
| Sweden – LNU            | 194 |
| Slovakia – SK 04        | 195 |
| United Kingdom – UK 35  | 197 |
| <b>2008</b>             |     |
| Belgium – BE 06         | 202 |
| Bulgaria – BG 04        | 204 |
| Cyprus – CY 03          | 206 |
| Czech Republic – CZ 04  | 208 |
| Latvia – LV 06          | 210 |
| Malta – MT 02           | 212 |
| Romania – RO 02         | 214 |
| Turkey – TR 06          | 216 |

Country: United Kingdom  
Survey: Health and Lifestyle Survey  
Survey Code: UK 03  
Year: 1992  
Type: Face to Face

---

Question 82

a. Overall, do you think that you get enough exercise?

Yes  
No  
Don't know

b. In general, compared with men/women of your own age, are you physically

more active  
less active  
or, about average  
Don't know

---

Question 83

a. On weekdays (working days) when not at work, how much time on average per day do you spend walking – getting work to work, shopping, walking the dog, for pleasure and so on?

... time per day  
Don't know

b. At weekends (rest days) how much time on average per day do you spend walking?

... time per day  
Don't know

---

Question 84

Compared to people of your own age, which of the following best describes your usual walking pace?

slow  
average  
fairly brisk  
or fast

It depends/Don't know

---

Question 88

a. Have you done any other physical activities in the last fortnight?

Yes  
No

b. What did you do?

...

c. How many times have you in the last fortnight?

... times

d. On average, how long did you spend doing it each time?

...

---

Question 89

a. Compared with 7 years ago, do you nowadays spend more, less or about the same amount of time on sport and physical activities?

Now spend more time  
Now spend less time  
About the same time  
Don't know

b. Would you say that you now spend

a bit more time  
or a lot more time  
Can't say

---

Question 90

Why do you now spend more time than seven years ago on sport or physical activities?

Will power/to get or keep fit  
More leisure time  
To take part with family  
More money  
Better facilities  
Better health  
Other, please specify: ...  
Can't say

---

Question 91

a. Would you say that you now spend

- a bit less time
- or a lot less time
- Can't say

b. Why do you spend less time on sport or physical activities than seven years ago?

- Family ties
- Less leisure time
- Companions not available
- Less money
- Less facilities
- Poor health/injuries
- Other, please specify: ...
- Can't say

Country: Denmark  
Survey: Danish Health and Morbidity Survey  
Survey Code: DK 01  
Year: 1994  
Type: Face to Face

---

Question 79

What do you do to stay healthy or to improve your health?

several answers acceptable

I don't do anything special  
I exercise/am physically active  
I eat healthy food  
I eat less  
I don't smoke  
I try to quit smoking/smoke less  
I don't drink alcohol  
I try to limit my alcohol consumption  
I try to live less stressed  
I try to get enough sleep  
I keep in touch with my family, friends and acquaintances  
other, what: ...  
no information

---

Question 80

If we look back on the past year, what would you say best describes your spare time activities?

Show card 14

heavy training and competitive sports regularly and several times a week  
exercise or heavy gardening at least 4 hours a week  
walk, bike or other easy exercise at least 4 hours a week (include Sunday excursions, light gardening and biking/walking to work  
read, watch TV or other sedentary occupation  
don't know  
no information

Country: Portugal  
Survey: National Health Survey  
Survey Code: PT 01  
Year: 1995  
Type: Face to Face

---

Question 1

WHICH OF THE FOLLOWING BEST DESCRIBES THE  
AMOUNT OF EXERCISE YOU USUALLY TAKE EACH DAY?  
(Show card No 9)

- I tend to be sedentary and do little walking
  - I am on my feet quite a lot but do not have to lift or  
carry objects very often
  - I usually have to lift or carry light objects or go up and  
down stairs several times a day
  - I do heavy physical work or carry very heavy loads
  - I don't know
- 

Question 2

DO YOU DO THINGS THAT REQUIRE LITTLE PHYSICAL  
ACTIVITY, SUCH AS READING, KNITTING, WATCHING TV  
ETC.?

- Yes
  - No
  - Don't know
- 

Question 3

HOW MANY DAYS PER WEEK?

- ... days
  - Don't know
- 

Question 4

AND FOR HOW MANY MINUTES EACH DAY ON AVERAGE?

- ... minutes
- Don't know

---

Question 5

DO YOU TAKE LIGHT EXERCISE SUCH AS WALKING,  
CYCLING ETC.?

- Yes
- No
- Don't know

---

Question 6

HOW MANY DAYS PER WEEK?

- ... days
- Don't know

---

Question 7

AND FOR HOW MANY MINUTES EACH DAY ON AVERAGE?

- ... minutes
- Don't know

Country: United Kingdom  
Survey: The Scottish Health Survey  
Survey Code: UK 10  
Year: 1995  
Type: Face to Face + self administered

---

Question 149

I'd like to ask you about some of the things you do at work or in your free time that involve physical activity. Which of the activities on this card would you normally take part in during an average week?

SHOW CARD B

Cycling/exercise bike  
Exercises (press ups, sit ups, etc)  
Aerobics/keep fit/gymnastics/dance for fitness  
Other types of dancing  
Weight training  
Swimming  
Running/jogging  
Football/rugby  
Badminton/tennis  
Squash  
Golf/hill walking  
Other walking of 1 mile or more  
Other, 'Which others?' ...  
None of these

---

Question 151

On how many occasions per week do you usually go cycling/use your exercise bike?

Less than once a week  
Once a week  
2-3 times a week  
4-5 times a week  
6-7 times a week or more

---

Question 152

How much time do you usually spend cycling/using your exercise bike on each occasion?



Less than 10 minutes  
10 minutes, less than 20 minutes  
20 minutes, less than 30 minutes  
30 minutes, less than 2 hours  
2 hours or longer

---

Question 153

When you go cycling/use your exercise bike do you usually find yourself

breathing normally,  
breathing faster than normal,  
or gasping for breath?

---

Question 184

On how many occasions per week do you usually go for walks of 1 mile or more?

Less than once a week  
Once a week  
2-3 times a week  
4-5 times a week  
6-7 times a week or more

---

Question 185

How much time do you usually spend walking?

Less than 10 minutes  
10 minutes, less than 20 minutes  
20 minutes, less than 30 minutes  
30 minutes, less than 2 hours  
2 hours or longer

---

Question 186

When you go walking do you usually find yourself

breathing normally,  
breathing faster than normal,  
or gasping for breath?

---

Question 200

Do you think you get enough exercise for your age and health?

Yes  
No

---

Question 201

Would you like to take more exercise?

Yes  
No

---

Question 203

Would you consider taking more exercise for any of the reasons shown on this card?

SHOW CARD E.  
What other reason?

To feel healthier or fitter  
To lose weight  
To look better  
To prevent disease or ill-health  
To enjoy myself  
To reduce stress

~~None of these reasons~~

---

Question 353

Do you mainly take the lift or climb the stairs?

Lift  
Stairs  
Lift up/stairs down

Country: Finland  
Survey: Finnish Health Care Survey  
Survey Code: FI 05  
Year: 1996  
Type: Face to Face

---

Question C6K9

HOW OFTEN DO YOU ENGAGE IN PHYSICAL ACTIVITY FOR AT LEAST HALF AN HOUR SO THAT YOU ARE AT LEAST MILDLY SHORT OF BREATH AND SWEATING?

Daily  
2 - 5 times a week  
Once a week  
2 - 3 times a month  
About once a month or less frequently  
Never, because of an illness

---

Question C7K6

TAKING YOUR BREATHING INTO ACCOUNT, TO WHAT EXTENT CAN YOU TOLERATE PHYSICAL EXERCISE?

WELL,  
FAIRLY WELL  
NOT AT ALL?

Country: International  
Survey: Eurobarometer  
Survey Code: INT 03  
Year: 1996  
Type: Face to Face

---

Question 129

Here are some factors which may be linked to a lesser or greater extent to heart disease. In your opinion, which is the main factor? And which comes second?

SHOW CARD

Main factor  
Second factor

Unhealthy diet  
Lack of exercise  
Excessive alcohol consumption  
Stress  
Being overweight  
Don't know

Country: Luxembourg  
Survey: Panel Living in Luxembourg  
Survey Code: LU 01  
Year: 1996  
Type: Face to Face

---

Question 49

To look after your health, do you:

do some sports?  
avoid smoking  
undergo a regular medical check-up

YES  
NO

Country: Belgium  
Survey: Health Interview Survey  
Survey Code: BE 01  
Year: 1997  
Type: Face to Face

---

Question AP.02

For at least once a week, do you engage in any regular physical activity (such as jogging, cycling,. etc.) long enough to work up sweat?

Yes, ... days/week  
No

Country: Switzerland  
Survey: Swiss Health Survey  
Survey Code: CH 01  
Year: 1997  
Type: Face to Face

---

Question 48.21

Do you normally walk and/or use your bicycle for 20 minutes or more every day?

- Yes
  - No
  - Don't know
  - No reply
- 

Question 48.30

How often do you work up a sweat at work, i.e. at your place of work or doing housework or gardening?

- Very frequently
- Frequently
- Occasionally
- Rarely
- Very rarely
- Never
- No reply

Country: Germany  
Survey: German National Health Examination and Interview Survey  
Survey Code: DE 05  
Year: 1998  
Type: ???

---

Question 62

What is the average time per day (24 hours) you spend doing the following:

Monday-Friday ... hours (total=24,0 hours)  
Saturday/Sunday ... hours (total=24,0 hours)

Sleeping, relaxing  
Sitting down (e.g. in the office, in the car, watching TV, or reading)  
Light activities (e.g. cooking, walking, shopping, tidying up, personal hygiene, sales)  
Moderate activities (e.g. jogging, decorating, cleaning, cycling, swimming, building work)  
Strenuous activity (e.g. carrying heavy things, strenuous gardening, chopping wood, competitive sport, ball sports)

---

Question 64

When you climb three flights of stairs are you (normally) out of breath and/or do you sweat?

Yes  
No  
Unable to climb 3 flights of stairs



Country: Ireland  
Survey: Survey of Lifestyle, Attitudes and Nutrition (SLÁN)  
Survey Code: IE 01  
Year: 1998  
Type: Self administered

---

Question B1

Considering a 7-day period (a week), how many times on average do you do the following kinds of exercise for more than 20 minutes during your free time?

- a. STRENUOUS EXERCISE (HEART BEATS RAPIDLY)  
(e.g. running, jogging, hockey, football, soccer, squash, basketball, judo, roller skating, vigorous swimming, vigorous long distance cycling)

... Times per Week

- b. MODERATE EXERCISE (NOT EXHAUSTING)  
(e.g. fast walking, tennis, badminton, easy swimming, easy cycling, volleyball, baseball, popular and folk dancing, heavy gardening)

... Times per Week

- c. MILD EXERCISE (MINIMAL EFFORT)  
(e.g. yoga, golf, easy walking, fishing from river bank, bowling, archery, light gardening)

... Times per Week

---

Question B2

At least once a week do you engage in any regular activity, such as jogging or cycling long enough to work up sweat?

No  
Yes

If yes, how many days per week?

... days

---

Question B3

Do you do light household work? (e.g. dusting, washing dishes, repairing clothes)

Seldom/Never  
1-3 times per month  
Once per week  
3-4 times per week  
Most days

---

Question B4

Do you do heavy household work? (e.g. vacuuming/hoovering, washing floors and windows, carrying rubbish bags)

Seldom/Never  
1-3 times per month  
Once per week  
3-4 times per week  
Most days

Country: United Kingdom  
Survey: Health Education Monitoring Survey  
Survey Code: UK 02  
Year: 1998  
Type: Face to Face

---

Question 104

Some kinds of housework are heavier than others. This card gives examples of heavy housework, it does not include everything, these are just examples. Was any of the housework you did in the past 4 weeks this kind of heavy housework?

SHOW CARD Y

Yes  
No

During the past 4 weeks on how many separate days have you done that kind of heavy housework?

---

Question 105

Have you done any gardening, did you or building in the past 4 weeks?

Yes  
No

Have you done any gardening, did you or building work listed on this card?

SHOW CARD Z

Yes  
No

Have you done any gardening, did you or building work from this card, or any similar heavy manual work?

SHOW CARD AA

Yes  
No

During the past 4 weeks, on how many days have you done this kind of heavy manual gardening or did you?

---

Question 106

I'd like you to think now about all the walking you've done in the past 4 weeks, either locally or away from here. Include any country walks and any walking to and from work, and any other walks that you have done.

In the past four weeks have you done any walks that lasted between 5 and 10 minutes?.

- Yes
- No
- Can't walk at all/ Housebound

Did you do any walks that lasted for at least 15 minutes but less than 30 minutes?

- Yes
- No

During the last 4 weeks, how many times have you done a walk that lasted for at least 15 minutes but less than 30 minutes?

... times

Did you do any walks that lasted for 30 minutes or more?

- Yes
- No

During the past 4 weeks how many times did you do any walks lasting for 30 minutes or more?

... times

Which of the following best describes your usual walking pace

- a slow pace
- a steady average pace
- a fairly brisk pace
- or a fast pace - at least 4 mph?

---

Question 110

Now I would like you to look at this card, and say which of the statements best describes you.

SHOW CARD CC

- I intend to take more exercise within the next month
- I intend to take more exercise within the next six months
- I intend to take more exercise within the next year
- I intend to take more exercise, but not in the next year

I'm unlikely to take more exercise

---

Question 111

Now I would like you to look at this card, and say which of the statements best describes you.

SHOW CARD DD

I'm unlikely to take more exercise

I intend to take more exercise within the next month

I intend to take more exercise within the next six  
months

I intend to take more exercise within the next year

I intend to take more exercise but not in the next year

Country: United Kingdom  
Survey: Health Survey for England  
Survey Code: UK 09  
Year: 1998  
Type: Face to Face + self administered

---

Question 128

Now I'd like to ask you about some of the things you have done in the last week. By last week I mean in the seven days up to yesterday.

In the last week, have you done a continuous walk that lasted at least 5 minutes  
(not counting things done as part of school lessons)?

Yes  
No

---

Question 129

On how many days in the last week did you do a continuous walk that lasted at least 5 minutes (not counting things done as part of school lessons)?

One day  
Two days  
Three days  
Four days  
Five days  
Six days  
Every day

---

Question 130

On each day that you did a walk like this for at least 5 minutes, how long did you spend walking altogether?  
Please give an answer from this card.

Show card G

5 minutes, less than 15 minutes  
15 minutes, less than 30 minutes  
30 minutes, less than 1 hour  
1 hour, less than 1½ hours  
1½ hours, less than 2 hours  
2 hours, less than 2½ hours

2½ hours, less than 3 hours  
3 hours, less than 3½ hours  
3½ hours, less than 4 hours  
4 hours or more

---

Question 131

How long did you spend walking on each day?

... hours ... minutes

---

Question 132

Which of the following describes your usual walking pace

a slow pace,  
a steady average pace,  
a fairly brisk pace,  
or, a fast pace - at least 4 mph?  
None of these

... days

---

Question 137

In the last week, that is last (day) up to yesterday, have you done any sports or exercise activities (not counting things done as part of school lessons)?

Show card H

Yes  
No

---

Question 149

Still thinking about last week. On how many of the weekdays did you do active things, like the things on this card or other activities like these (not counting things done as part of school lessons)?

Show card I

None in last week  
1 day  
2 days  
3 days  
4 days  
5 days

---

Question 150

On each weekday that you did active things like these, how long did you spend?

Show card G

- Less than 5 minutes
- 5 minutes, less than 15 minutes
- 15 minutes, less than 30 minutes
- 30 minutes, less than 1 hour
- 1 hour, less than 1½ hours
- 1½ hours, less than 2 hours
- 2 hours, less than 2½ hours
- 2½ hours, less than 3 hours
- 3 hours, less than 3½ hours
- 3½ hours, less than 4 hours
- 4 hours or more

---

Question 151

How long did you spend doing active things like these on each weekday?

... hours ... minutes

---

Question 152

Now thinking about all the activities during the past week you have just told me about including any walking, (gardening, housework,) sports or other active things.

On how many days in the last week in total did you do any of these activities (not counting things done as part of school lessons)?

- None
- One day
- Two days
- Three days
- Four days
- Five days
- Six days
- Every day

---

Question 160

Were the activities you did last week different from what



you would usually do for any reason?  
Would you usually do more physical activity or less?

- NO - same as usual
  - YES DIFFERENT - usually do MORE
  - YES DIFFERENT - usually do LESS
- 

Question 176

I'd like you to think about all the walking you have done in the past 4 weeks either locally or away from here. Please include any country walks, walking to and from work and any other walks that you have done. In the past four weeks, that is since (date four weeks ago), have you done a continuous walk that lasted at least 5 minutes?

- Yes
  - No
  - Can't walk at all
- 

Question 177

In the past four weeks, have you done a continuous walk that lasted at least 15 minutes? (That is since (date four weeks ago))

- Yes
  - No
- 

Question 178

During the past four weeks, on how many days did you do a walk of at least 15 minutes? (That is since (date four weeks ago))

... days

---

Question 179

On that day (any of those days) did you do more than one walk lasting at least 15 minutes?

- Yes, more than one walk of 15+mins (on at least one day)
  - No, only one walk of 15+ mins a day
-

Question 180

On how many days in the last four weeks did you do more than one walk that lasted at least 15 minutes?

... days

---

Question 181

How long did you usually spend walking each time you did a walk for 15 minutes or more?

... hours ... minutes

---

Question 182

Which of the following best describes your usual walking pace

a slow pace,  
a steady average pace,  
a fairly brisk pace,  
or, a fast pace - at least 4 mph?

Country: United Kingdom  
Survey: The Scottish Health Survey  
Survey Code: UK 13  
Year: 1998  
Type: Face to Face

---

Question 180

I'd like you to think about all the walking you have done in the past 4 weeks either locally or away from here. Please include any country walks, walking to and from work and any other walks that you have done. In the past four weeks, that is since (date four weeks ago), have you done a continuous walk that lasted at least 5 minutes?

- Yes
- No
- Can't walk at all

In the past four weeks, have you done a continuous walk that lasted at least 15 minutes?  
(That is since (date four weeks ago))

- Yes
- No

During the past four weeks, on how many days did you do a walk of at least 15 minutes?  
(That is since (date four weeks ago))

...

On that day (any of those days) did you do more than one walk lasting at least 15 minutes?

- Yes, more than one walk of 15+ mins (on at least one day)
- No, only one walk of 15+ mins a day

On how many days in the last four weeks did you do more than one walk that lasted at least 15 minutes?

How long did you usually spend walking each time you did a walk for 15 minutes or more?

...

RECORD HERE MINUTES SPENT WALKING.

---

Question 190

Now thinking about all the activities during the past week you have just told me about including any walking, (gardening, housework,) sports or other active things. On how many days in the last week in total did you do any of these activities (not counting things done as part of school lessons)?

- None
- One day
- Two days
- Three days
- Four days
- Five days
- Six days
- Every day

Were the activities you did last week different from what you would usually do for any reason?

IF YES PROBE: Would you usually do more physical activity or less?

- NO - same as usual
- YES DIFFERENT - usually do MORE
- YES DIFFERENT - usually do LESS

Country: Estonia  
Survey: Living Conditions Survey (NORBALT)  
Survey Code: EE 05  
Year: 1999  
Type: Face to Face

---

Question G 12

I will now give you a list of things people can do to improve their health status.  
Do you on a regular basis take any of these steps in order to strengthen your health? (Several answers possible)

- None of these
- Try to spend much time in fresh air
- Try to eat healthy and regularly
- Have resting days
- Drink tea from healing herbs
- Walk a lot
- Exercise/do gymnastics
- Take vitamins regularly
- Read literature about health care and health protection
- No answer

Country: Italy  
Survey: Health Conditions and the Use of Health Services  
Survey Code: IT 01  
Year: 1999  
Type: Face to Face

---

Question 15.3

Do you habitually carry out a LIGHT physical, exercise activity (taking at least a one-kilometre walk, climbing stairs, etc..)?

- NO
  - YES, over 4 hours per week
  - YES, 4 hours per week
  - YES, less than 4 hours per week
- 

Question 15.7

Can your domestic work mainly be considered a physical activity?

- Light
  - Moderate
  - Heavy, till perspiring
- 

Question 15.9

Can your work activity mainly be considered a physical activity?

- Light, I spend most of the time sitting down
- Moderate, I spend most of the time standing up
- Heavy, till perspiring at least half of the working hours

Country: Lithuania  
Survey: Living Conditions Survey  
Survey Code: LT 01  
Year: 1999  
Type: Face to Face

---

Question G 12

I will now give you a list of things people can do to improve their health status.  
Do you on a regular basis take any of these steps in order to strengthen your health? (Several answers possible)

- None of these
- Try to spend much time in fresh air
- Try to eat healthy and regularly
- Have resting days
- Drink tea from healing herbs
- Walk a lot
- Exercise/do gymnastics
- Take vitamins regularly
- Read literature about health care and health protection
- No answer

Country: Latvia  
Survey: Living Conditions Survey  
Survey Code: LV 01  
Year: 1999  
Type: Face to Face

---

Question G 12

I will now give you a list of things people can do to improve their health status.  
Do you on a regular basis take any of these steps in order to strengthen your health? (Several answers possible)

- None of these
- Try to spend much time in fresh air
- Try to eat healthy and regularly
- Have resting days
- Drink tea from healing herbs
- Walk a lot
- Exercise/do gymnastics
- Take vitamins regularly
- Read literature about health care and health protection
- No answer



Country: Portugal  
Survey: National Health Interview Survey  
Survey Code: PT 03  
Year: 1999  
Type: Face to Face

---

Question 1

For 15-years-old and older people

ABOUT EVERYDAY ACTIVITIES, AT WORK, AT SCHOOL,  
AT HOME OR SOMEWHERE ELSE, TELL ME...

WHICH OF THE FOLLOWING SITUATIONS DESCRIBES THE BEST  
THE EFFORT REQUIRED BY [YOUR/HER/HIS] EVERYDAY  
ACTIVITIES? MENTION ONLY ONE.

(Use card No.9)

USUALLY SITTING AND FEW WALKING

STANDING UP OR WALKING QUITE ENOUGH, WITHOUT LIFTING  
OR CARRYING OBJECTS MANY TIMES,

LIFTING OR CARRYING LIGHT WEIGHTS OR  
GOING UP AND DOWN STAIRS OFTEN.

HARD PHYSICAL WORK OR CARRYING HEAVY WEIGHTS.

Don't know

BESIDES THESE QUESTIONS WE WOULD STILL LIKE TO  
KNOW SOMETHING ABOUT OTHER ACTIVITIES OF THIS  
FAMILY'S MEMBERS (15-years-old and older)

Country: Canada  
Survey: Canadian Community Health Survey Cycle 1.1  
Survey Code: CA 01  
Year: 2000  
Type: Face to Face

---

Question PA6

Thinking back over the past 3 months, which of the following best describes your usual daily activities or work habits?

- Usually sit during the day and don't walk around very much
- Stand or walk quite a lot during the day but don't have to carry or lift things very often
- Usually lift or carry light loads, or have to climb stairs or hills often
- Do heavy work or carry very heavy loads

Country: Cyprus  
Survey: Population Risk Factors Survey  
Survey Code: CY 02  
Year: 2000  
Type: Face to Face

---

Question 31

In which group do you belong in relation to physical activity?  
Including any activity in your leisure time, like physical activity, gardening,  
dancing etc.

I am not physical active

Light physical activity

Vigorous activity of a minimum of 20 minutes duration for once or twice a week  
(sweating, heart beating, out of breath)

Vigorous activity of a minimum of 20 minutes duration for three or more times a  
Week

Country: Denmark  
Survey: Health and Morbidity in Denmark  
Survey Code: DK 02  
Year: 2000  
Type: Face to Face

---

Question 80A

Are you generally more or less physically active,  
compared to 5 years ago?

More active  
Unchanged  
Less active  
Don't know

---

Question 80B

Why did you change your level of physical activity?  
What is the most important reason for the change?

Write:...

Country: Estonia  
Survey: Time Use Survey  
Survey Code: EE 06  
Year: 2000  
Type: Face to Face

---

Question I52

During the past 4 weeks did you participate in any of the following sports?  
If yes, then how many times? If no, then how many times during the year.  
NB! For professionals sport is work – when they are paid.

Yes

How many times: ...

No

But during the year how many times

running, jogging

cycling

skiing

swimming

gymnastics, aerobics

ball games

sailing, rowing wind-surfing

tennis

thought games

other sports which?

...

Country: Finland  
Survey: Survey on health behaviour  
Survey Code: FI 01  
Year: 2000  
Type: Self administered

---

Question 92

In the past year (12 months), have any of the persons mentioned below advised you to exercise more?

yes  
no

physician  
other health care provider  
family member  
other

Country: Finland  
Survey: Health 2000  
Survey Code: FI 03  
Year: 2000  
Type: Self administered

---

Question 29

On how many days during an ordinary week do you do something that demands strenuous physical effort at least 10 minutes at a time; e.g. running, aerobics, heavy gardening or other activity that makes you breathe faster and speeds up your heart rate (choose 0 if you do not exercise like this on any day of the week).

... days per week

---

Question 30

How much time altogether do you use in strenuous exercise during the days when you practice strenuous exercise at least 10 minutes at a time?

... hours ... minutes

---

Question 31

On how many days during an ordinary week do you do something that demands moderate physical effort at least 10 minutes at a time, such as cycling, hoovering, gardening or other activity that slightly speeds up your breath and pulse? (Do not include walking)

... days per week

---

Question 32

How much time during such a day do you spend exercising moderately?

... hours ... minutes

---

Question 33

On how many days during an ordinary week do you walk quickly at least 10 minutes at a time to move from one place to another or for recreation, satisfaction, or to keep fit?

... days a week

---

Question 34

How much time do you spend walking quickly on days when you walk quickly at least 10 minutes at a time?

... hours ... minutes



Country: Hungary  
Survey: National Health Interview Survey  
Survey Code: HU 01  
Year: 2000  
Type: Face to Face

---

Question 44

Do you regularly do physical work or sport activities (i.e.: including your work) for at least 10 minutes that cause significant sweating or increase heart rate?

- Yes
  - No
  - Unable to do this type of activity
  - Does not know/Not sure
  - Refused
- 

Question 45

And how often did you do these activities during the past 12 months?

- At least once a day
- Several times a week, but not every day
- At least once a week
- At least once a month
- Less frequently
- Does not know/Not sure
- Refused

Country: International  
Survey: European Physical Activity Surveillance System (EUPASS)  
Survey Code:  
Year: 2000  
Type: Telephone

---

Question A1

Please consider for the following questions about your physical activity only the last three months.

How often do you participate in sports?

- regularly, more than 4 hours per week
  - regularly, 2-4 hours per week
  - regularly, 1-2 hours per week
  - less than 1 hour per week
  - no sports activities
- 

Question A2

How much time on average do you spend per day (24 hours) on:  
*(Round up time to full or half hours – Like 0,5 Hrs. This concerns only physical activities or efforts.  
Please try to distribute all 24 hours over the 5 categories)*

sleeping, resting:

Monday to Friday \_\_, \_\_ h      Saturday/Sunday \_\_, \_\_ h

Sitting (like at the office, in the car, watching television, eating, reading):

Monday to Friday \_\_, \_\_ h      Saturday/Sunday \_\_, \_\_ h

light activities (like cooking, walking at low pace, shopping, tidying up the room, body care, selling):

Monday to Friday \_\_, \_\_ h      Saturday/Sunday \_\_, \_\_ h

moderate activities (like jogging, renovating, cleaning, construction work):

Monday to Friday \_\_, \_\_ h      Saturday/Sunday \_\_, \_\_ h

strenuous activities (like carrying heavy weights, strenuous gardening, chopping wood, competitive sport, Ball games):

Monday to Friday \_\_, \_\_ h      Saturday/Sunday \_\_, \_\_ h

---

Question A4

Do you normally get out of breath or into a sweat when you climb stairs over three floors?

- yes
  - no
  - I am not able to climb three floors.
- 

Question B1a

The next questions are about the time you spent being physically active in the last 7 days. They include questions about activities you do at work, to get from place to place, as part of your house and yard work, and in your spare time for recreation, exercise or sport.

Now, think about all the vigorous activities which take hard physical effort that you did in the last 7 days. Vigorous activities make you breathe much harder than normal and may include heavy lifting, digging, aerobics, or fast bicycling. Think about only those physical activities that you did for at least 10 minutes at a time.

During the last 7 days, on how many days did you do vigorous physical activities?

[Interviewer clarification: Think about only those physical activities that you do for at least 10 minutes at a time.]

[Interviewer: Include all jobs.]

- \_\_\_\_\_ days per week
- Refused [Interviewer: Do not read]
- Don't know [Interviewer: Do not read]

[Interviewer: If respondent answers zero, refuses or does not know, skip to Question 2a]

---

Question B1b

How much time in total did you usually spend on one of those days doing vigorous physical activities?

\_\_\_\_\_ hours \_\_\_\_ minutes

[Interviewer clarification: Think about only those physical activities that you do for at least 10 minutes at a time.]

[Interviewer probe: An average time per day is being sought. If the respondent can't answer because the pattern of time spent varies widely from day to day, ask:

" How much time in total would you spend in a usual week doing vigorous physical activities?"

\_\_\_\_\_ hours \_\_\_\_ minutes per week]

---

Question B2a

Now think about activities which take moderate physical effort that you did in the last 7 days? Moderate physical activities make you breathe somewhat harder than normal and

may include carrying light loads, bicycling at a regular pace, or doubles tennis. Do not include walking. Again, think about only those physical activities that you did for at least 10 minutes at a time.

During the last 7 days, on how many days did you do moderate physical activities?

[Interviewer clarification: Think about only those physical activities that you do for at least 10 minutes at a time.]

[Interviewer: Include all jobs.]

\_\_\_\_\_ days per week  
Refused [Interviewer: Do not read]  
Don't know [Interviewer: Do not read]

[Interviewer: If respondent answers zero, refuses or does not know, skip to Question 3a]

---

### Question B2b

How much time in total did you usually spend on one of those days doing moderate physical activities?

\_\_\_\_\_ hours \_\_\_\_ minutes

[Interviewer clarification: Think about only those physical activities that you do for at least 10 minutes at a time.]

[Interviewer probe: An average time per day is being sought. If the respondent can't answer because the pattern of time spent varies widely from day to day, or includes time spent in multiple jobs, ask: How much time in total would you spend in a usual week doing moderate physical activities during a usual week?

\_\_\_\_\_ hours \_\_\_\_ minutes per week]

---

### Question B3a

Now think about the time you spent walking in the last 7 days. This includes walking at work and at home, walking to travel from place to place, and any other walking that you might do solely for recreation, sport, exercise or leisure.

During the last 7 days, on how many days did you walk for at least 10 minutes at a time?

[Interviewer clarification: Think about only the walking that you do for at least 10 minutes at a time.]

[Interviewer: Include all jobs.]

\_\_\_\_\_ days per week  
Refused [Interviewer: Do not read]  
Don't know [Interviewer: Do not read]

[Interviewer: If respondent answers zero, refuses or does not know, skip to Question 4a]

---

Question B3b

How much time in total did you usually spend walking on one of those days?

\_\_\_\_ hours \_\_\_\_ minutes

[Interviewer probe: An average time per day is being sought. If the respondent can't answer because the pattern of time spent varies widely from day to day, ask: How much time in total would you spend walking in a usual week?

\_\_\_\_ hours \_\_\_\_ minutes per week

---

Question B3c

At what pace did you usually walk? Did you walk at:

- \_\_\_\_ a Vigorous pace, that makes you breathe much harder than normal;
- \_\_\_\_ a Moderate pace that makes you breathe somewhat harder than normal; or
- \_\_\_\_ a Slower pace where there is no change in your breathing.

[Interviewer probe: A usual pace is being sought. If the respondent can't answer because the pace varies widely from day to day, or from across job, transportation and leisure categories, ask: How much time would you spend in a usual week walking at a slow pace?

\_\_\_\_ hours \_\_\_\_ minutes per week]

---

Question B5a

How much physical activity did you do in your place of work in the last 7 days?

- Much
  - Moderate
  - Little or no
- 

Question C1

The next statements are about being physically active regularly for 30 minutes in different situations. For each item, please indicate how sure you are that you would exercise in that situation. Give one answer for each item.

- I'm sure I could*
- I'm rather sure I could*
- Maybe I could*
- I'm rather sure I could not*
- I'm sure I could not*

How certain are you that you could do 30 minutes of moderate physical activity (such as brisk walking) most days of the week?

How certain are you that you could do 30

minutes of moderate physical activity if you were sad or tired?

How certain are you that you could do 30 minutes of moderate physical activity if you had a lot of work or demands from friends or family?

---

### Question C2

To what extent have you been motivated to do sport and physical activity ...

*Very much*  
*Much*  
*Not much/not little*  
*A little*  
*Not at all*

by your family or friends

by the media including newspapers, magazines, TV & radio

by local authorities and/or politicians

by health care personnel (like doctors or nurses) or an insurance company

at work or at school

---

### Question C3

To what extent are the following statements concerning sport and physical activity true for your personally?

*definitely true*  
*true*  
*partly true*  
*not true*  
*not true*  
*at all*

The area where I live offers many opportunities to be physically active.

Local sport clubs and other providers in my neighbourhood offer many opportunities to be physical active.

My municipality/city does enough for its citizens concerning their physical activities.

Country: Italy  
Survey: Aspects of daily living  
Survey Code: IT 03  
Year: 2000  
Type: Face to Face

---

Question 4.2

Is your domestic and extradomestic work mainly characterised by scarce, moderate or heavy physical activity? (one answer for each line)

Scarce  
Moderate  
Heavy

Family or housework  
Working activity

Country: Romania  
Survey: Health Interview Survey  
Survey Code: RO 01  
Year: 2000  
Type: Face to Face

---

Question 109

Do you perform, regularly, at least once a week, any activity as: jogging, riding the bike, team sports, long enough to sweat?

Yes, How many days?  
... days/week  
No

---

Question 110

What is the main reason for performing such a physical activity?

Recreation  
Keeping in shape  
Therapeutically  
Other reason: ...

---

Question 112

How would you describe the physical effort involved by your domestic activities?

Small  
Average  
Intense



Country: United Kingdom  
Survey: The Health Survey for England  
Survey Code: UK 12  
Year: 2000  
Type: Face to Face

---

Question 121

I'd like you to think about all the walking you have done in the past four weeks either locally or away from here. Please include any country walks and any other walks that you have done. In the past four weeks, that is since (date four weeks ago), have you done a continuous walk that lasted at least 5 minutes?

Yes  
No  
Can't walk at all

IF Yes

In the past 4 weeks, have you done a continuous walk that lasted at least 15 minutes? (That is since (date four weeks ago))

Yes  
No

IF Yes

During the past 4 weeks, on how many days did you do a walk of at least 15 minutes? (That is since (date four weeks ago))

...

---

Question 122

How long did you usually spend walking each time you did a walk for 15 minutes or more?

... hours  
... minutes

---

Question 123

In the past four weeks, that is since (date 4 weeks ago) have you done a short walk, of less than 5 minutes continuous walking?

- Yes
- No

---

Question 124

Which of the following best describes your usual walking pace

- ... a slow pace,
- ... a steady average pace,
- ... a fairly brisk pace,
- ... or, a fast pace - at least 4 mph?
- none of these

Country: United States  
Survey: National Health Interview Survey  
Survey Code: US 01  
Year: 2000  
Type: Face to Face

---

Question AHB.090

How often do you do VIGOROUS activities for AT LEAST 10 MINUTES that cause HEAVY sweating or LARGE increases in breathing or heart rate?

NUMBER:

Never  
1-995 times  
Unable to do this type activity  
Refused  
Don't know

TIME PERIOD:

Day  
Week  
Month  
Year  
Unable to do this type activity  
Refused  
Don't know

---

Question AHB.100

About how long do you do these vigorous activities each time?

NUMBER:

1-995  
Refused  
Don't know

TIME PERIOD:

Minutes  
Hours  
Refused  
Don't know

---

Question AHB.108

Each time you do these vigorous activities, do you do them 20 minutes or more, or less than 20 minutes?

- Less than 20 minutes
- 20 minutes or more
- Refused
- Don't know

---

Question AHB.110

How often do you do LIGHT OR MODERATE activities for AT LEAST 10 MINUTES that cause ONLY LIGHT sweating or a SLIGHT to MODERATE increase in breathing or heart rate?

NUMBER:

- Never
- 1-995 times
- Unable to do this type activity
- Refused
- Don't know

TIME PERIOD:

- Day
- Week
- Month
- Year
- Unable to do this type activity
- Refused
- Don't know

---

Question AHB.120

About how long do you do these light or moderate activities each time?

- NUMBER:
- 1-995
  - Refused
  - Don't know

TIME PERIOD:

- Minutes
- Hours
- Refused
- Don't know

---

Question AHB.128

Each time you do these light or moderate activities, do you do them 20 minutes or more, or less than 20 minutes?

Less than 20 minutes

20 Minutes or more

Refused

Don't know

Country: Australia  
Survey: National Health Survey  
Survey Code: AU 01  
Year: 2001  
Type: Face to Face

---

Question AF210

I WILL NOW ASK YOU ABOUT MODERATE AND VIGOROUS EXERCISE APART FROM WALKING.

IN THE LAST 2 WEEKS, DID YOU DO ANY EXERCISE WHICH CAUSED A MODERATE INCREASE IN YOUR HEART RATE OR BREATHING, THAT IS, MODERATE EXERCISE?

Yes  
No

---

Question AF211

HOW MANY TIMES DID YOU DO ANY MODERATE EXERCISE IN THE LAST 2 WEEKS?

Number: ...

---

Question AF212

WHAT WAS THE TOTAL AMOUNT OF TIME YOU SPENT DOING MODERATE EXERCISE IN THE LAST 2 WEEKS?

Hours/minutes  
100 hours or more

---

Question AF213

IN THE LAST 2 WEEKS, DID YOU DO ANY (OTHER) EXERCISE WHICH CAUSED A LARGE INCREASE IN YOUR HEART RATE OR BREATHING, THAT IS, VIGOROUS EXERCISE?

Yes  
No

---

Question AF214

HOW MANY TIMES DID YOU DO ANY VIGOROUS  
EXERCISE IN THE LAST 2 WEEKS?

Number: ...

---

Question 215

WHAT WAS THE TOTAL AMOUNT OF TIME YOU SPENT  
DOING VIGOROUS EXERCISE IN THE LAST 2 WEEKS?

Hours/minutes  
100 hours or more

Country: Belgium  
Survey: Health Interview Survey  
Survey Code: BE 02  
Year: 2001  
Type: Face to Face

---

Question AP02

At least once a week do you engage in any regular activity such as jogging, cycling, ... etc. long enough to work up sweat?

Yes: .... Days/week  
No  
Don't know

---

Question AP03

During the last 7 days, on how many days did you do vigorous physical activities like heavy lifting, digging, aerobics, or fast bicycling?

... days per week  
Does not know  
No answer

---

Question AP04

How much time in total did you usually spend on one of those days doing vigorous physical activities?

... hours ... minutes  
Does not know  
No answer

---

Question AP05

During the last 7 days, on how many days did you do moderate physical activities?

... Days per week  
Does not know  
No answer



---

Question AP06

How much time in total did you do usually spend on one of those days doing moderate physical activities?  
Indicate an average time per day

Hours: ... Minutes: ...  
Does not know  
No answer

---

Question AP07

During the last 7 days, on how many days did you walk for at least 10 minutes at a time?  
This includes walking at work and at home, walking to travel from place to place, and any other walking that you might do solely for recreation, sport, exercise or leisure.

... days per week  
Does not know  
No answer

---

Question AP08

How much time in total did you usually spend walking on one of those days?

... hours ... minutes  
Does not know  
No answer

---

Question AP09

At what pace did you usually walk?  
Did you walk at:

A Vigorous pace, that makes you breathe much harder than normal  
A Moderate pace that makes you breathe somewhat harder than normal  
A Slower pace where there is no change in your breathing  
Does not know  
No answer

Survey: Health Behaviour among the Finnish Adult Population  
Survey Code: FI 06  
Year: 2001  
Type: Face to Face

---

Question 82

In the past year (12 months), have any of the persons mentioned below advised you to exercise more?

yes  
no

physician  
other health care provider  
family member  
other

Country: Finland  
Survey: Health Behaviour among the Finnish Elderly Population  
Survey Code: FI 09  
Year: 2001  
Type: Face to Face

---

Question 53

How often do you walk outdoors for at least half an hour?

- daily
  - 4 – 6 times a week
  - 2 – 3 times a week
  - once a week
  - 2 – 3 times a month
  - a few times a year or less
  - I cannot walk at all due to an illness or injury
- 

Question 67

Which of the activities mentioned below do you pursue outside your home?

- yes
  - visiting friends, acquaintances and relatives in my home district
  - travelling (as a tourist)
  - sports events (as a spectator or participant)
  - dancing
  - clubs and associations
  - parish activities
  - theatre, cinema, concerts
  - games (chess, cards, ball games, etc.)
  - fishing or hunting
  - cottage life, camping
  - studying
  - homemaking, child care
  - light work, voluntary work
  - nothing
  - other, please specify:
- 

Question 74

Exercising is always worthwhile

Fully agree  
More or less agree  
Don't know  
disagree to some extent  
Fully disagree

Country: Croatia  
Survey: Health Interview Survey  
Survey Code: HR 02  
Year: 2001  
Type: Face to Face

---

Question 85

Think about all activities which take hard physical effort that you did in the last 7 days, regardless whether there were part of your regular job or for recreation. This includes activities as heavy lifting, digging, wood chipping, aerobics, playing football or basketball, fast cycling etc. (Only activities lasting for at least 10 minutes at a time should be included).

On how many days, during the last 7 days, did you do vigorous physical activities?

... days  
Refusal  
Don't know

---

Question 86

Think about all activities which take hard physical effort that you did in the last 7 days, regardless whether there were part of your regular job or for recreation. This includes activities as heavy lifting, digging, wood chipping, aerobics, playing football or basketball, fast cycling etc. (Only activities lasting for at least 10 minutes at a time should be included).

How much time in total, in a day, did you usually spend doing vigorous physical activities?

... hours ... minutes/day

---

Question 87

Now think about activities which take moderate physical effort that you did in the past 7 days.

This could be carrying light loads, ironing, house-cleaning, cycling at a regular pace, sewing etc Do not include walking. Again, think about those physical activities lasting for at least 10 minutes at a time.

During the last 7 days, on how many days did you do moderate physical activities?

... days

Refusal  
Don't know

---

Question 88

Now think about activities which take moderate physical effort that you did in the past 7 days.

This could be carrying light loads, ironing, house-cleaning, cycling at a regular pace, sewing etc Do not include walking. Again, think about those physical activities lasting for at least 10 minutes at a time.

How much time in total, in a day, did you usually spend doing moderate physical activities?

... hours ... minutes

---

Question 89

Now think about the time you spent walking in the last 7 days. (Including walking at work and at home, walking because of travel from place to place, and any other walking for recreation, sport, exercise or leisure).

On how many days, during the last 7 days, did you walk for at least 10 minutes at a time?

... days  
Refusal  
Don't know

---

Question 90

Now think about the time you spent walking in the last 7 days. (Including walking at work and at home, walking because of travel from place to place, and any other walking for recreation, sport, exercise or leisure).

How much time in total, in a day, did you usually spend walking?

... hours ... minutes

Country: Iceland  
Survey: Health and lifestyle of the Icelandic population  
Survey Code: IS 03  
Year: 2001  
Type: Face to Face

---

Question 20

Relative to your age, are you in good or poor bodily condition?

- Very good
- Rather good
- Neither good nor poor
- Rather poor
- Very poor

Country: Italy  
Survey: Aspects of daily living  
Survey Code: IT 04  
Year: 2001  
Type: Face to Face

---

Question 5.2

Is your domestic and extradomestic work mainly characterised by scarce, moderate or heavy physical activity? (one answer for each line)

Scarce  
Moderate  
Heavy

Family or housework  
Working activity



Country: Macedonia  
Survey: EUROHIS of Republic of Macedonia  
Survey Code: MK 03  
Year: 2001  
Type: Face to Face

---

Question 85

Think about all the vigorous activities which take hard physical effort that you did in the past 7 days. Vigorous activities make you breathe much harder than normal and may include heavy lifting, digging, aerobics, or fast bicycling. Think about only those physical activities that you did for at least 10 minutes at a time.

During the past 7 days, on how many days did you do vigorous physical activities?

Think about only those physical activities that you do for at least 10 minutes at a time.

... days  
Refusal  
Don't know

---

Question 86

How much time in total did you usually spend on one of those days doing vigorous physical activities?

... hours ... minutes/day

Interviewer probe: An average time per day is being sought. If the respondent can't answer because the pattern of time spent varies widely from day to day, ask: "What is the total amount of time you spent over the past 7 days doing vigorous physical activities?"

... hours ... minutes

---

Question 87

Now think about activities which take moderate physical effort that you did in the past 7 days. Moderate physical activities make you breathe somewhat harder than normal and may include carrying light loads, bicycling at a regular pace, or doubles tennis. Do not include walking. Again, think about only those physical activities that you did for at least 10 minutes at a time.

During the past 7 days, on how many days did you do moderate physical activities?

- ... days
  - none
  - Refusal
  - Don't know
- 

Question 88

How much time in total did you usually spend on one of those days doing moderate physical activities?

... hours ... minutes

Interviewer probe: An average time per day is being sought. If the respondent can't answer because the pattern of time spent varies widely from day to day, or includes time spent in multiple jobs, ask: "What is the total amount of time you spent over the last 7 days doing moderate physical activities?"

... hours ... minutes

---

Question 89

Now think about the time you spent walking in the past 7 days. This includes walking at work and at home, walking to travel from place to place, and any other walking that you did solely for recreation, sport, exercise or leisure.

During the past 7 days, on how many days did you walk for at least 10 minutes at a time?

- ... days
  - none
  - Refusal
  - Don't know
- 

Question 90

How much time in total did you usually spend walking on one of those days?

... hours ... minute

Interviewer probe: An average time per day is being sought. If the respondent can't answer because the pattern of time spent varies widely from day to day, ask: "What is the total amount of time you spent walking over the past 7 days?"

... hours ... minutes

Country: Netherlands  
Survey: Patient survey - Second Dutch National Survey of General Practice  
Survey Code: NL 02  
Year: 2001  
Type: Face to Face

---

Question LRV44s1

And how many days a week do you do more strenuous household chores such as scrubbing floors, carrying heavy shopping, etc?

---

Question LRV44s2

And how much time on average per day in hours and minutes do you spend on this?

Number of hours: ...

---

Question LRV44s3

Number of minutes: ...

Country: Netherlands  
Survey: Continuous Quality of Life Survey  
Survey Code: NL 03  
Year: 2001  
Type: Self administered

---

Question 365

Imagine a normal week during the past months.  
Could you indicate how many days per week you performed the activities mentioned below, how much time you spent on them on an average day and how strenuous these activities were?

walking to/from work or school  
number of days per week  
... Days  
average time per day  
... hours ... min.

cycling to /from work or school  
number of days per week  
... Days  
average time per day  
... hours ... min..

not applicable

effort

Slow  
average  
fast

---

Question 367

Domestic activities

light and moderately strenuous domestic work (standing work like cooking, dishwashing, ironing, feeding / bathing children and running work like hoovering, shopping)

heavy domestic work (scrubbing, beating out the rugs, walking with heavy shopping bags)

number of days per week

Days:...

average time per day

hours: ... min: ...

Country: Slovenia  
Survey: CINDI Health Monitor Questionnaire  
Survey Code: SI 01  
Year: 2001  
Type: ???

---

Question 65

During the last 7 days, on how many days did you do vigorous physical activities?

Think only about physical activities that you did for at least 10 minutes at a time.  
(Please mark 0 if you did not do any vigorous physical activity)

On ... days during the last 7 days

---

Question 66

Moderate physical activity: This refers to activity that requires moderate physical effort that makes you breathe somewhat harder than normal and may include carrying light loads, bicycling at a regular pace, or playing tennis doubles. Do not include walking.

During the last 7 days, on how many days did you do moderate physical activities?

Think only about physical activities that you did for at least 10 minutes at a time.  
(Please mark 0 if you did not do any moderate physical activity.)

On ... days during the last 7 days

---

Question 67

During the last 7 days, on how many days did you walk for at least 10 minutes at a time? Include walking at work, at home, to commute from place to place, walking for recreation, and in connection with sport, exercise or leisure.  
(Please mark 0 if you did not walk at least 10 minutes at a time)

On .. days during the last 7 days

---

Question 69

During the last year (12 months) have you been advised by any of the under mentioned to increase your physical activity?

yes  
no

a doctor  
other health care personnel  
a family member  
other

Country: Switzerland  
Survey: Swiss Health Survey 2002  
Survey Code: CH 02  
Year: 2002  
Type: Telephone

---

Question 44.02

And in your work, whether a professional activity, household chores or gardening, how many days a week do you perspire (on average)?

... days a week (between 0 and 7 days)  
no reply

---

Question 44.10

The following question is not only concerned with physical activities which make you perspire, but also other forms of less intensive movement:

If you think of physical activities in the course of which you become more or less out of breath, such as walking quickly, hiking, dancing, gardening or various sports:

How many days a week do you do physical activity of this kind?

... days a week (between 1 and 7 days)  
never  
don't know  
no reply

---

Question 44.11

What is the average duration of these physical activities on these days?

... hours ... minutes a day  
don't know  
no reply

---

Question 44.40

Do you think you do enough physical activity for



your health?

yes  
no  
don't know  
no reply

Country: Finland  
Survey: FINRISK 2002  
Survey Code: FI 07  
Year: 2002  
Type: Self administered

---

Question 80

How do you consider your current physical condition?

very good  
quite good  
fair  
quite bad  
very bad

Country: Finland  
Survey: Health Behaviour among the Finnish Adult Population  
Survey Code: FI 13  
Year: 2002  
Type: Face to Face

---

Question 84

In the past year (12 months), have any of the persons mentioned below advised you to exercise more?

yes  
no

physician  
other health care provider  
family member  
other

---

Question 85

How would you assess your own exercise habit?  
Do you exercise for the maintenance of health in your own opinion

Far too little  
A little too little  
Properly  
Too much

Country: France  
Survey: National survey on health and national health insurance (ESPS)  
Survey Code: FR 09  
Year: 2002  
Type: Face to Face

---

Question 07

Has your doctor asked you to take physical exercise?

Yes  
no  
doesn't know

Country: Ireland  
Survey: Survey of Lifestyle, attitudes and nutrition (SLAN)  
Survey Code: IE 03  
Year: 2002  
Type: Face to Face

---

#### Question B1

Considering a 7-day period (a week), how many times on average do you do the following kinds of exercise for more than 20 minutes during your free time?

(Please write the appropriate number on each line)

a) STRENUOUS EXERCISE (HEART BEATS RAPIDLY)

(e.g. running, jogging, hurling, camogie, football, soccer, squash, basketball, judo, roller skating, vigorous swimming, vigorous long distance cycling, advanced aerobics)

Times per Week: ...

b) MODERATE EXERCISE (NOT EXHAUSTING)

(e.g. fast walking, tennis, badminton, easy swimming, easy cycling, popular and folk dancing, intermediate aerobics, heavy gardening)

Times per Week: ...

c) MILD EXERCISE (MINIMAL EFFORT)

(e.g. yoga, golf, easy walking, fishing from river bank, bowling, beginners aerobics, archery, light gardening)

Times per Week: ...

d) LITTLE / NO ACTIVITIES

Times per Week: ...

---

#### Question B2

How many days, if any, in an average week do you walk for 30 minutes or more?

... days

Country: International  
Survey: Eurobarometer October 2002  
Survey Code: INT 06  
Year: 2002  
Type: Face to Face

---

#### Question 27

The next questions are about the time you spent being physically active in the last 7 days. They include questions about activities you do at work, to get from place to place, as part of your house and yard work, and in your spare time for recreation, exercise or sport.

In answering the following questions, Vigorous physical activities refer to activities that take hard physical effort and make you breathe much harder than normal. Moderate activities refer to activities that take moderate physical effort and make you breathe somewhat harder than normal.

In answering the questions, think about only those physical activities that you did for at least 10 minutes at a time.

During the last 7 days, on how many days did you do vigorous physical activities like heavy lifting, digging, aerobics or fast bicycling ?

... days per week  
None (Go to question 32.)

---

#### Question 28

How much time in total did you usually spend on one of those days doing vigorous physical activities ?

... hours  
... minutes

---

#### Question 29

During the last 7 days, on how many days did you do moderate physical activity like carrying light loads, bicycling at a regular pace or doubles tennis ?

Do not include walking.

... days per week  
None

---

Question 30

How much time in total did you usually spend on one of those days doing moderate physical activities ?

- ... Hours
  - ... Minutes
- 

Question 31

During the last 7 days, on how many days did you walk for at least 10 minutes at a time ?

This includes walking at work and at home, walking to travel from place to place, and any other walking that you might do solely for recreation, sport, exercise or leisure.

- ... days per week
  - None
- 

Question 32

How much time in total did you usually spent walking on one of those days ?

- ... hours
  - ... minutes
- 

Question 34

In the last 7 days how much physical activity did you get ...?

- Much
- Moderate
- Little or no

- At work
- For the purposes of transportation
- In and around your home, including housework, gardening, general maintenance, or caring for your family
- In recreation, sport and leisure-time activities

Country: International

Survey: World Health Surveys-WHS-Consolidated multi-country questionnaire

Survey Code: INT 08

Year: 2002

Type: Face to Face

---

Question 4400a

Now I am going to ask you about the time you spent being physically active in the last 7 days. Please answer each question even if you do not consider yourself to be an active person. Think about the activities you do at work, as part of your house and yard work, to get from places to place, and in your spare time for recreation, exercise or sport.

(Show Physical Activity card to respondent ---- see Appendix D/4)

Vigorous Activity

During the last 7 days, on how many days did you do vigorous physical activities like heavy lifting, digging, aerobics, or fast bicycling? Think about only those physical activities that you did for at least 10 minutes at a time.

Days per week: ...

---

Question 4400b

How much time in total did you usually spend on one of those days doing vigorous physical activities?

Hours / minutes

---

Question 4401a

Moderate Activity

Again, think only about those physical activities that you did for at least 10 minutes at a time. During the last 7 days, on how many days, did you do moderate physical activities like carrying light loads, bicycling at a regular pace, or double tennis? Do not include walking.

Days per week



---

Question 4401b

How much time in total did you usually spend on one of those days doing moderate physical activities?

Hours/minutes

---

Question 4402a

During the last 7 days, on how many days did you walk for at least 10 minutes at a time? This includes walking at work and at home, walking to travel from place to place, and any other walking that you did solely for recreation, sport, exercise or leisure.

Days per week: ...

---

Question 4402b

How much time in total did you usually spend walking on one of those days?

Hours/Minutes

Country: Italy  
Survey: Aspects of daily living  
Survey Code: IT 05  
Year: 2002  
Type: Face to Face

---

Question 5.2

Is your domestic and extradomestic work mainly characterised by scarce, moderate or heavy physical activity? (one answer for each line)

Scarce  
Moderate  
Heavy

Family or housework  
Working activity

Country: Lithuania  
Survey: Lithuanian Health Behaviour Monitoring  
Survey Code: LT 02  
Year: 2002  
Type: Self administered

---

Question 60

Vigorous physical activities: refer to activities that take hard physical effort and make you breathe much harder than normal.

During the last 7 days, on how many days did you do vigorous physical activities like heavy lifting, digging, aerobics, or fast bicycling? Include only those physical activities that you did for at least 10 minutes at a time. (please mark 0 if you did not do any vigorous physical activity)

On ... days

---

Question 61

How much time did you usually spend on one of those days doing vigorous physical activity?

... hours ... minutes

---

Question 62

Moderate physical activities: refer to activities that take moderate physical effort and make you breathe somewhat harder than normal.

During the last 7 days, on how many days did you do moderate physical activities like carrying light loads, bicycling at a regular pace, or doubles tennis?

Include only those physical activities that you did for at least 10 minutes at a time. Do not include walking. (please mark 0 if you did not do any moderate physical activity)

On ... days

---

Question 63

How much time in total did you usually spend on one of those days doing moderate physical activity?

... hours ... minutes

---

Question 67

During the last year (12 months) have you been advised to increase your physical activity by any of the following:

yes  
no

a doctor  
other health care personnel  
a family member  
others

Country: Latvia  
Survey: Health Behaviour Survey of Latvian Adult Population  
Survey Code: LV 03  
Year: 2002  
Type: Self administered

---

Question 81

Have you been advised to increase your physical activity by any of the following:

yes  
no

a doctor  
nurse  
a dentist  
other health care personnel  
a family member  
others

---

Question 82

Vigorous physical activities: refer to activities that take hard physical effort and make you breathe much harder than normal.

During the last 7 days, on how many days did you do vigorous physical activities like heavy lifting, digging, aerobics, or fast bicycling? Include only those physical activities that you did for at least 10 minutes at a time.

... days

---

Question 83

How much time did you usually spend on one of those days doing vigorous physical activity?

... hours ... minutes

---

Question 84

Moderate physical activities: refer to activities that take moderate physical effort and make you breathe somewhat harder than normal.

During the last 7 days, on how many days did you do moderate physical

activities like carrying light loads, bicycling at a regular pace, or doubles tennis? Include only those physical activities that you did for at least 10 minutes at a time. Do not include walking.

... days

Country: Malta  
Survey: First National Health Interview Survey  
Survey Code: MT 01  
Year: 2002  
Type: Face to Face

---

#### Question 53

##### PHYSICAL ACTIVITY

We are also interested in the physical activities that people do as part of their everyday lives.

I am going to ask you about the time you spend being physically active in the past 7 days. Please answer each question even if you do not consider yourself to be an active person. Think about the activities you do at work or school, at home or in your garden, to get from place to place and the spare time for recreation, exercise or sport.

Think about all the vigorous activities that take hard physical effort that you did in the past 7 days.

Vigorous activities make you breathe much harder than normal and may include heavy lifting, digging, football, vigorous swimming, aerobics or fast bicycling. Think about only those physical activities that you did for at least 10 minutes at a time.

During the past 7 days, on how many days did you do vigorous physical activities?

---

#### Question 54

How much time in total did you usually spend on one of those days doing vigorous physical activities?

... hours ... minutes

---

#### Question 55

Now think about activities which take moderate physical effort that you did in the past 7 days.

Moderate physical activities make you breathe somewhat harder than normal and may include carrying light loads, easy swimming, easy cycling or doubles tennis. Do not include walking. Again, think about only those physical activities that you did for at least 10 minutes at a time.

During the past 7 days, on how many days did you do moderate physical activities?

---

Question 56

How much time in total did you usually spend on one of those days doing moderate physical activities?

... hours ... minutes

---

Question 57

Now think about the time you spent walking in the past 7 days. This includes walking at work, at school and at home, walking to travel from place to place and any other walking that you did solely for recreation, sport, exercise or leisure.

During the past 7 days, on how many days did you walk for at least 10 minutes at a time?

---

Question 58

How much time in total did you usually spend walking on one of those days?

---

Question 60

At least once a week do you engage in any regular activity such as jogging or cycling for long enough to work up sweat?

Yes  
No

---

Question 61

How many days per week do you engage in this activity?

Question 62

What is this activity?

...

---

Question 63

HOUSEHOLD ACTIVITIES

Do you do light household work (e.g. dusting, washing dishes, changing light bulbs/plugs)?



Most days  
3-4 times per week  
Once per week  
1-3 times per month  
Seldom/never

---

Question 64

Do you do heavy household work (e.g. washing floors and windows, vacuuming/hovering, plastering/whitewashing)?

Most days  
2-3 times per week  
Once per week  
1-3 times per month  
Seldom/never

Country: Netherlands  
Survey: Continuous Quality of Life Survey  
Survey Code: NL 05  
Year: 2002  
Type: Self administered

---

Question 367

Domestic activities

light and moderately strenuous domestic work (standing work like cooking, dishwashing, ironing, feeding / bathing children and running work like hoovering, shopping)

heavy domestic work (scrubbing, beating out the rugs, walking with heavy shopping bags)

number of days per week

Days:...

average time per day

hours: ... min: ...

Country: Denmark  
Survey: EUROHIS Recommended HIS Field Test Questionnaire - Long version  
Survey Code: REC 02  
Year: 2002  
Type: Face to Face

---

#### Question 114

Interviewer: We are also interested in the physical activities that people do as part of their everyday lives. I am going to ask you about the time you spend being physically active in the past 7 days. Please answer each question even if you do not consider yourself to be an active person. Think about the activities you do at work, at home or in your garden, to get from place to place and the spare time for recreation, exercise or sport.

Think about all the vigorous activities which take hard physical effort that you did in the past 7 days. Vigorous activities make you breathe much harder than normal and may include heavy lifting, digging, aerobics, or fast bicycling. Think about only those physical activities that you did for at least 10 minutes at a time.

During the past 7 days, on how many days did you do vigorous physical activities?

... days  
none  
Refusal  
Don't know

[Interviewer clarification: Think about only those physical activities that you do for at least 10 minutes at a time.]

[Interviewer: Include all activities and jobs.]

---

#### Question 115

How much time in total did you usually spend on one of those days doing vigorous physical activities?

... Hours ... minutes/day

[Interviewer clarification: Think about only those physical activities that you do for at least 10 minutes at a time.]

[Interviewer probe: An average time per day is being sought. If the respondent can't answer because the pattern of time spent varies widely from day to day, ask: "What is the total amount of time you spent over the past 7 days doing vigorous physical activities?"

... Hours ... minutes

---

#### Question 116

Now think about activities which take moderate physical effort that you did in the past 7 days?

Moderate physical activities make you breathe somewhat harder than normal and may include carrying light loads, bicycling at a regular pace, or doubles tennis. Do not include walking. Again, think about only those physical activities that you did for at least 10 minutes at a time.

During the past 7 days, on how many days did you do moderate physical activities?

... days  
none  
Refusal  
Don't know

[Interviewer clarification: Think about only those physical activities that you do for at least 10 minutes at a time.]

[Interviewer: Include all activities and jobs.]

---

#### Question 117

How much time in total did you usually spend on one of those days doing moderate physical activities?

... Hours ... minutes

[Interviewer clarification: Think about only those physical activities that you do for at least 10 minutes at a time.]

[Interviewer probe: An average time per day is being sought. If the respondent can't answer because the pattern of time spent varies widely from day to day, or includes time spent in multiple jobs, ask:

What is the total amount of time you spent over the last 7 days doing moderate physical activities?

... hours ... minutes

---

Question 118

Now think about the time you spent walking in the past 7 days. This includes walking at work and at home, walking to travel from place to place, and any other walking that you did solely for recreation, sport, exercise or leisure.

During the past 7 days, on how many days did you walk for at least 10 minutes at a time?

- ... days
- none
- Refusal
- Don't know

[Interviewer clarification: Think about only the walking that you do for at least 10 minutes at a time.]

[Interviewer: Include all activities and jobs.]

---

Question 119

How much time in total did you usually spend walking on one of those days?

... Hours ... minutes

Interviewer probe: An average time per day is being sought. If the respondent can't answer because the pattern of time spent varies widely from day to day, ask:

What is the total amount of time you spent walking over the past 7 days?

... hours ... minutes

Country: Slovakia  
Survey: Health Monitor Survey  
Survey Code: SK 02  
Year: 2002  
Type: Face to Face

---

Question 6.4

Vigorous physical activities: refer to activities that take hard physical effort and make you breathe much harder than normal.

During the last 7 days, on how many days did you do vigorous physical activities like heavy lifting, digging, aerobics, or fast bicycling? Include only those physical activities that you did for at least 10 minutes at a time. (please mark 0 if you did not do any vigorous physical activity)

On ... days

---

Question 6.5

How much time did you usually spend on one of those days doing vigorous physical activity?

... hours ... minutes

---

Question 6.6

Moderate physical activities: refer to activities that take moderate physical effort and make you breathe somewhat harder than normal.

During the last 7 days, on how many days did you do moderate physical activities like carrying light loads, bicycling at a regular pace, or doubles tennis? Include only those physical activities that you did for at least 10 minutes at a time. Do not include walking. (please mark 0 if you did not do any moderate physical activity)

On ... days

---

Question 6.7

How much time in total did you usually spend on one of those days doing moderate physical activity?

... hours ... minutes

---

Question 6.8

During the last 7 days, on how many days did you walk for at least 10 minutes at the time?

Include walking at work and at home, walking to travel from place to place, and any other walking that you did solely for recreation, sport, exercise or leisure.  
(please mark 0 if you did not do any vigorous physical activity)

On ... days

---

Question 6.9

How much time in total did you usually spend walking on one of those days?

... hours ... minutes per day

---

Question 6.14

During the last year (12 months) have you been advised to increase your physical activity by any of the following?

yes  
no

doctor  
other health care personnel  
family member  
other

Country: United Kingdom  
Survey: General Household Survey  
Survey Code: UK 07  
Year: 2002  
Type: Face to Face

---

Question 15 Sprtnot

Is there any sport or recreational activity that you do not do at the moment but would like to do?

Yes  
No

---

Question 16 Sprtwch

Which one activity would you like to do?

...



Country: United Kingdom  
Survey: Health Survey for England  
Survey Code: UK 28  
Year: 2002  
Type: Face to Face

---

Question 147

On how many days in the last week did you/(name of child) do a continuous walk that lasted at least 5 minutes not counting things done as part of school lessons??

One day  
Two days  
Three days  
Four days  
Five days  
Six days  
Every day

---

Question 148

On each day that you/(name of child) did a walk like this for at least 5 minutes, how long did you/s/he spend walking altogether?

Please give an answer from this card

5 minutes, less than 15 minutes  
15 minutes, less than 30 minutes  
30 minutes, less than 1 hour  
1 hour, less than 1 1/2 hours  
1 1/2 hours, less than 2 hours  
2 hours, less than 2 1/2 hours  
2 1/2 hours, less than 3 hours  
3 hours, less than 3 1/2 hours  
3 1/2 hours, less than 4 hours  
4 hours or more, please specify how long (How long did you/  
(name of child) spend walking on each day?)

hours :... minutes: ....

---

Question 149

Which of the following describes your usual walking pace

... READ OUT ...

... a slow pace,  
... a steady average pace,  
... a fairly brisk pace,  
... or, a fast pace - at least 4 mph?  
(None of these)

---

Question 164

Were the activities you/(name of child) did last week different from what you/s/he would usually do for any reason?

No - same as usual  
Yes different - usually do more  
Yes different - usually do less

---

Question 165

I'd like to ask you about some of the things you have done in the past four weeks that involve physical activity, this could be at work/college or in your free time.

Can I just check, were you in paid employment or self-employed in the past four weeks?

Yes  
No

---

Question 171a

I'd like you to think about all the walking you have done in the past four weeks either locally or away from here. Please include any country walks, walking to and from work and any other walks that you have done. In the past four weeks, that is since (date four weeks ago), have you done a continuous walk that lasted at least 5 minutes?

Yes,  
No,  
Can't walk at all

---

Question 171b

IF Yes, in the past four weeks, that is since (date four weeks a go), have you done a continuous walk that lasted at least 30 minutes?

Yes  
No

---

Question 171c

IF Yes, during the past four weeks, that is since (date four weeks ago),  
on how many days did you do a walk of at least 30 minutes?

... days

---

Question 172

Which of the following best describes your usual walking pace

...READ OUT...

...a slow pace,

...an average pace,

...a fairly brisk pace,

...or, a fast pace - at least 4 mph?

None of these

Country: Canada  
Survey: Canadian Community Health Survey Cycle 2.1  
Survey Code: CA 02  
Year: 2003  
Type: Face to Face + Telephone

---

Question PAC\_Q6

Thinking back over the past 3 months, which of the following best describes your usual daily activities or work habits?

Usually sit during the day and don't walk around very much

Stand or walk quite a lot during the day but don't have to carry or lift things very often

Usually lift or carry light loads, or have to climb stairs or hills often

Do heavy work or carry very heavy loads

---

Question STR\_Q6\_6

How often do you jog or do other exercise to deal with stress?

Often

Sometimes

Rarely

Never

---

Question ETA\_Q13

You think about burning up calories when you exercise.

Always

Usually

Often

Sometimes

Rarely

Never

Country: Spain  
Survey: National Health Survey 2003  
Survey Code: ES 03  
Year: 2003  
Type: Face to Face

---

Question 30

Could you indicate approximately how many hours a day you usually sleep?

Number of hours per day: ...

Country: Finland  
Survey: Health Behaviour among the Finnish Adult Population  
Survey Code: FI 10  
Year: 2003  
Type: Face to Face

---

Question 87

In the past year (12 months), have any of the persons mentioned below advised you to exercise more?

yes  
no

physician  
other health : care provider  
family member  
other

Country: Finland  
Survey: Health Behaviour among the Finnish Elderly Population  
Survey Code: FI 11  
Year: 2003  
Type: Face to Face

---

Question 54

How often do you perform other physical activities than walking for at least half an hour (e.g., skiing, bicycling, swimming, gymnastics, games, dance)?

daily  
4 – 6 times a week  
2 – 3 times a week  
once a week  
2 – 3 times a month  
a few times a year or less  
I cannot exercise at all due to an illness or injury

---

Question 69

Which of the activities mentioned below do you pursue outside your home?

yes

visiting friends, acquaintances and relatives in my home district  
travelling (as a tourist)  
sports events (as a spectator or participant)  
dancing  
clubs and associations  
parish activities  
theatre, cinema, concerts  
games (chess, cards, ball games, etc.)  
fishing or hunting  
cottage life, camping  
studying  
homemaking, child care  
light work, voluntary work  
nothing  
other, please specify:

---

Question 77

Exercising is always worthwhile

Fully agree  
More or less agree  
Don't know  
disagree to some extent  
Fully disagree



Country: Croatia  
Survey: World Health Survey  
Survey Code: HR 03  
Year: 2003  
Type: Face to Face

---

Question 2011

In the last 30 days, how much difficulty did you have in vigorous activities, such as running 3 km (or equivalent) or cycling?

None  
Mild  
Moderate  
Severe  
Extreme/Cannot do

---

Question 2104

[Mary] has no problems with walking, running or using her hands, arms and legs. She jogs 4 kilometres twice a week.

In the last 30 days, how much difficulty did [name of person] have in vigorous activities, such as running 3 km (or equivalent) or cycling?

None  
Mild  
Moderate  
Severe  
Extreme/Cannot do

---

Question 2106

[Anton] does not exercise. He cannot climb stairs or do other physical activities because he is obese. He is able to carry the groceries and do some light household work.

In the last 30 days, how much difficulty did [name of person] have in vigorous activities, such as running 3 km (or equivalent) or cycling?

None  
Mild  
Moderate  
Severe  
Extreme/Cannot do

---

Question 2108

[David] is paralyzed from the neck down. He is unable to move his arms and legs or to shift body position. He is confined to bed.

In the last 30 days, how much difficulty did [name of person] have in vigorous activities, such as running 3 km (or equivalent) or cycling?

- None
  - Mild
  - Moderate
  - Severe
  - Extreme/Cannot do
- 

Question 2112

[Rob] is able to walk distances of up to 200 metres without any problems but feels tired after walking one kilometre or climbing up more than one flight of stairs. He has no problems with day-to-day physical activities, such as carrying food from the market.

In the last 30 days, how much difficulty did [name of person] have in vigorous activities, such as running 3 km (or equivalent) or cycling?

- None
  - Mild
  - Moderate
  - Severe
  - Extreme/Cannot do
- 

Question 2114

[Vincent] has a lot of swelling in his legs due to his health condition. He has to make an effort to walk around his home as his legs feel heavy.

In the last 30 days, how much difficulty did [name of person] have in vigorous activities, such as running 3 km (or equivalent) or cycling?

- None
  - Mild
  - Moderate
  - Severe
  - Extreme/Cannot do
- 

Question 3006

Please try to imagine what it would be like to live in the following health state: having limited long-distance vision - able to read and recognize objects at arm's length but not to distinguish faces across a room (i.e., at distance of 5 meters); no glasses available.

How much difficulty would a person in this state have with vigorous activities, such as running 3 km (or equivalent) or cycling?

- None
  - Mild
  - Moderate
  - Severe
  - Extreme/Cannot do
- 

#### Questions 4030 - 4032

Now I am going to ask you about the time you spent being physically active in the last 7 days. Please answer each question even if you do not consider yourself to be an active person. Think about the activities you do at work, as part of your house and yard work, to get from places to place, and in your spare time for recreation, exercise or sport.

#### Vigorous activity

Now, think about all the vigorous activities which take hard physical effort that you did in the last 7 days. Vigorous activities make you breathe much harder than normal and may include heavy lifting, digging, aerobics, or fast bicycling. Think only about those physical activities that you did for at least 10 minutes at a time. During the last 7 days, on how many days did you do vigorous physical activities?

How much time did you usually spend doing vigorous physical activities on one of those days?

- Hours per day : ...
  - Minutes per day: ...
- 

#### Questions 4033 – 4035

#### Moderate Activity

Now think about activities which take moderate physical effort that you did in the last 7 days. Moderate physical activities make you breathe somewhat harder than normal and may include carrying light loads, bicycling at a regular pace, or doubles tennis. Do not include walking. Again, think about only those physical activities that you did for at least 10 minutes at a time. During the last 7 days, on how many days did you do moderate physical activities?

How much time did you usually spend doing moderate physical activities on one of those days?

- Hours per day: ...
  - Minutes per day: ...
- 

#### Questions 4036 – 4038

#### Walking

Now think about the time you spent walking in the last 7 days. This includes at work and at home, walking to travel from place to place, and any other walking

that you might do solely for recreation, sport, exercise, or leisure. During the last 7 days, on how many days did you walk for at least 10 minutes at a time?

How much time did you usually spend walking on one of those days?

Hours per day: ...

Minutes per day: ...

Country: Croatia  
Survey: Croatian Health Survey  
Survey Code: HR 04  
Year: 2003  
Type: Face to Face

---

Question PHA 04

During the last year (12 months) have you been advised to increase your physical activity by any of the following?

No  
Yes

Doctor  
Other health care personnel  
Family member  
Other

Country: Hungary  
Survey: National Health Interview Survey  
Survey Code: HU 05  
Year: 2003  
Type: Face to Face

---

Question 39

During the last 7 days, on how many days did you do vigorous physical activities? Consider activities done for at least 10 minutes.

... days  
None of the days  
Does not know/Not sure  
Refused

---

Question 40

How much time did you usually spend doing vigorous physical activities on one of those days?

Hours per day?

... hrs

Minutes per day?

... mts

Does not know/Not sure  
Refused

---

Question 41

During the last 7 days, on how many days did you do moderate physical activities?

Consider activities done for at least 10 minutes.

... days  
None of the days  
Does not know/Not sure  
Refused

---

Question 42

How much time did you usually spend doing moderate physical activities on one of those days?

Hours per day?

... hrs

Minutes per day?

... mts

Does not know/Not sure

Refused

---

Question 43

During the last 7 days, on how many days did you walk for at least 10 minutes at a time? Consider the occasions when you walked for at least 10 minutes at a time.

... days

None of the days

Does not know

Refused

---

Question 44

How much time did you usually spend walking on one of those days?

Hours per day?

... hrs

Minutes per day?

... mts

Does not know

Refused

Country: Latvia  
Survey: Health Interview Survey  
Survey Code: LV 02  
Year: 2003  
Type: Face to Face

---

Question S 05

Over the last 3 weeks, what was your daily physical activity?

mostly sitting or lying  
mostly standing or walking  
daily physical effort  
hard daily physical effort

---

Question S 06

Over the last 3 months, did you spend at least 30 minutes doing physical exercises?

yes, every day  
4-6 times per week  
2-3 times per week  
once a week  
2-3 times per month  
once a month or more seldom  
I cannot do it because of my health  
no, I do not do it



Country: Netherlands  
Survey: Continuous Quality of Life Survey  
Survey Code: NL 08  
Year: 2003  
Type: Self administered

---

Question 367

Domestic activities

light and moderately strenuous domestic work (standing work like cooking, dishwashing, ironing, feeding / bathing children and running work like hoovering, shopping)

heavy domestic work (scrubbing, beating out the rugs, walking with heavy shopping bags)

number of days per week

Days:...

average time per day

hours: ... min: ...

Country: Sweden  
Survey: Living Condition Survey  
Survey Code: SE 03  
Year: 2003  
Type: Face to Face

---

Question 50

Can you run a short distance, say 100 meters, if you are in a hurry?

Yes Question 53 c if age 55+, question 55 if age below 55  
No

---

Question 63 A

- a) How tall are you?  
Number of centimetres.....
- b) How much do you weigh?  
Number of kilograms.....

Country: Turkey  
Survey: Turkey Demographic and Health Survey  
Survey Code: TR 01  
Year: 2003  
Type: Face to Face

---

Question 772

Now I want to ask some questions about your daily life.

YES  
NO

Do you make a branch of sports regularly?  
Do you participate the activities of any society/club/association regularly?  
Do you go to holiday other than your homeland/town?  
Do you go outside for meal with your family?  
Do you go to picnic?  
Do you put on make up?  
Do you wear head scarf when you go outside the street?

Country: Turkey

Survey: National Burden of Disease and Cost Effectiveness Study:  
National Health Survey

Survey Code: TR 05

Year: 2003

Type: Face to Face

---

Question 2011

In the last 30 days, how much difficulty did you have in vigorous activities, such as running 3km (or equivalent) or cycling?

None  
Mild  
Moderate  
Severe  
Extreme/Can not do

---

Question 2103

Meryem has no problems with walking, running or using her hands, arms and legs. She jogs 4 kilometres twice a week.

In the last 30 days, how much difficulty did Meryem have in vigorous activities, such as running 3 km (or equivalent) or cycling?

None  
Mild  
Moderate  
Severe  
Extreme/Cannot do

---

Question 2105

Ali does not exercise. He cannot climb stairs or do other physical activities because he is obese. He is able to carry the groceries and do some light household work.

In the last 30 days, how much difficulty did Ali have in vigorous activities, such as running 3 km (or equivalent) or cycling?

None  
Mild  
Moderate  
Severe  
Extreme/Cannot do

---

Question 2107

Davut is paralyzed from the neck down. He is unable to move his arms and legs or to shift body position. He is confined to bed.

In the last 30 days, how much difficulty did Davut have in vigorous activities, such as running 3 km (or equivalent) or cycling?

- None
  - Mild
  - Moderate
  - Severe
  - Extreme/Cannot do
- 

Question 2112

Veli has a lot of swelling in his legs due to his health condition. He has to make an effort to walk around his home as his legs feel heavy.

Overall in the last 30 days, how much of a problem did Veli have with moving around?

- None
  - Mild
  - Moderate
  - Severe
  - Extreme/Cannot do
- 

Question 2113

Veli has a lot of swelling in his legs due to his health condition. He has to make an effort to walk around his home as his legs feel heavy.

In the last 30 days, how much difficulty did Veli have in vigorous activities, such as running 3 km (or equivalent) or cycling?

- None
  - Mild
  - Moderate
  - Severe
  - Extreme/Cannot do
- 

Question 3006

Having limited long-distance vision - able to read and recognize objects at arm's length but not to distinguish faces across a room (i.e., at distance of 5 meters); no glasses available.

How much difficulty would a person in this state have with vigorous activities, such as running 3 km (or equivalent) or cycling?

None  
Mild  
Moderate  
Severe  
Extreme/Cannot do

---

Questions 4030 – 4032

Now I am going to ask you about the time you spent being physically active in the last 7 days. Please answer each question even if you do not consider yourself to be an active person. Think about the activities you do at work, as part of your house and yard work, to get from places to place, and in your spare time for recreation, exercise or sport.

Vigorous Activity

Now, think about all the vigorous activities which take hard physical effort that you did in last 7 days. Vigorous activities make you breath much harder than normal and may include heavy lifting, digging, aerobics or fast Within the last one week, how many days have you done any vigorous activity which lasted at least 10 minutes once started bicycling? Think only about those physical activities that you did for at least 10 minutes at a time. During the last 7 days, on how many days did you do vigorous physical activities?

... days

No

If "No", go to 4033

How much time did you usually spend doing vigorous physical activities on one of those days;

hours per day?

... hours

minutes per day?

... minutes

---

Questions 4033 – 4035

Moderate Activity

Now, think about activities which take moderate physical effort that you did in last 7 days. Moderate physical activities make you breath somewhat harder than normal and may include carrying light loads, bicycling at a regular pace, or doubles tennis. Do not include walking. Again, think about only those physical activities that you did for at least 10 minutes at a time. During the last 7 days, on how many days did you do moderate physical activities? (Show physical activity card to respondent)

... days

No

If "No" got to 4036

How much time did you usually spend doing moderate physical activities on one of those days;

hours per day?

... hours

minutes per day?

... minutes

---

#### Questions 4036 – 4038

##### Walking

Now, think about the time you spent walking in the last 7 days. This includes at work and at home, walking to travel from place to place , and any other walking that you might do solely for recreation, sport, exercise, or leisure. During the last 7 days, on how many days did you walk for at least 10 minutes at a time.

... days

No

If "No" go to 6000

How much time did you usually spend doing walking on one of those days;

hours per day?

... hours

minutes per day?

... minutes

Country: Australia  
Survey: National Health Survey  
Survey Code: AU 03  
Year: 2004  
Type: Face to Face

---

Question 19

Apart from insulin injections, medication or being on a special diet  
In the last 2 weeks have you taken any other action to manage your [condition]?

Yes  
No

Which other actions have you taken to manage your [condition]?  
(Multiple response)

Losing weight  
Exercised most days  
Taken vitamins/mineral supplements  
Taken natural/herbal medicines  
Other



Country: Belgium  
Survey: Health Interview Survey  
Survey Code: BE 05  
Year: 2004  
Type: Self administered

---

Question PA02

At least once a week do you engage in any regular activity such as jogging, cycling, etc. long enough to work up sweat?

Yes

If yes, specify: ... days per week

No

I don't know

---

Question PA03

Vigorous physical efforts

During the last 7 days, on how many days did you do vigorous physical activities like heavy lifting, digging, aerobics, or fast bicycling?

... day(-s) per week

---

Question PA04

Vigorous physical efforts

How much time did you usually spend doing vigorous physical activities on one of those days?

... hours

... minutes/day

I don't know

---

Question PA05

Moderate physical efforts

During the last 7 days, on how many days did you do moderate physical activities like carrying light loads, bicycling at a regular place, or doubles tennis? (Do not include walking)

... days(-s) per week

---

Question PA06

Moderate physical efforts

How much time did you usually spend doing moderate physical activities on one of those days?

- ... hours
  - ... minutes/day
  - I don't know
- 

Question PA07

Walking

During the last 7 days, on how many days did you walk for at least 10 minutes at a time?

- ... day(-s) per week
- 

Question PA08

Walking

How much time did you usually spend walking on one of those days?

- ... hours
  - ... minutes/day
  - Don't know
- 

Question PA09

Walking

At what pace did you usually walk?

Did you walk at:

- a vigorous pace, that makes you breathe much harder than normal
- a moderate pace that makes you breathe somewhat harder than normal
- a slower pace where there is no change in your breathing .
- Don't know

Country: Estonia  
Survey: Health behaviour among Estonian adult population  
Survey Code: EE 07  
Year: 2004  
Type: Self administered

---

Question 73

During the last 12 months, have you done any physical exercise that was completely or partly paid for by your own place of work or by that of your family member?

yes, regularly  
yes, sometimes  
no  
I do not work

---

Question 76

How would you rate your current (physical) fitness status?

very good  
fairly good  
satisfactory  
fairly poor  
very poor

---

Question 77

Have you been advised to increase your physical activity by any of the following during the last 12 months?

yes  
no  
  
physician  
other health care personnel  
family member  
other: ...

Country: Finland  
Survey: Health Behaviour among the Finnish Adult Population  
Survey Code: FI 12  
Year: 2004  
Type: Face to Face

---

Question 77

How would you rate your current (physical) fitness status?

very good  
quite good  
satisfactory  
rather poor  
very poor

---

Question 78

In the past year (12 months), have any of the persons mentioned below advised you to exercise more?

yes  
no

physician  
other health: ...  
care provider  
family member  
other

Country: International (Finland, Baltic States)

Survey: FINBALT Health Monitor

Survey Code:

Year: 2004

Type: Self administered

---

Question 58

How would you rate your current (physical) fitness status? OR: How would you describe your present physical fitness status?

- 1 very good
  - 2 fairly good
  - 3 satisfactory
  - 4 fairly poor
  - 5 very poor
- 

Question 59

During the last year (12 months) have you been advised to increase your physical activity by any of the following:

- yes no
  - a doctor
  - other health care personnel
  - a family member
  - others
- 

Question 25

Vigorous physical activities: refer to activities that take hard physical effort and make you breathe much harder than normal.

During the last 7 days, on how many days did you do vigorous physical activities like heavy lifting, digging, aerobics, or fast bicycling? Include only those physical activities that you did for at least 10 minutes at a time. (please mark 0 if you did not do any vigorous physical activity)

On ... days

---

Question 26

How much time did you usually spend on one of those days doing vigorous physical activity?

... hours ... minutes

---

Question 27

Moderate physical activities: refer to activities that take moderate physical effort and make you breathe somewhat harder than normal.

During the last 7 days, on how many days did you do moderate physical activities like carrying light loads, bicycling at a regular pace, or doubles tennis? Include only those physical activities that you did for at least 10 minutes at a time. Do not include walking. (please mark 0 if you did not do any moderate physical activity)

On ... days

---

Question 28

How much time in total did you usually spend on one of those days doing moderate physical activity?

... hours ... minutes

---

Question29

During the last 7 days, on how many days did you walk for at least 10 minutes at the time? Include walking at work and at home, walking to travel from place to place, and any other walking that you did solely for recreation, sport, exercise or leisure. (please mark 0 if you did not do any vigorous physical activity)

On ... days

---

Question 30

How much time in total did you usually spend walking on one of those days?

... hours ... minutes

Country: Netherlands  
Survey: Continuous Quality of Life Survey  
Survey Code: NL 07  
Year: 2004  
Type: Self administered

---

Question 344

Domestic activities

light and moderately strenuous domestic work (standing work like cooking, dishwashing, ironing, feeding/bathing children and running work like Hoovering, shopping)

heavy domestic work (scrubbing, beating out the rugs, walking with heavy shopping bags)

number of days per week

Days:...

average time per day

hours: ... min: ...

Country: Sweden  
Survey: Survey of Living Conditions  
Survey Code: SE 04  
Year: 2004  
Type: Face to Face

---

Question 50a

Can you run a short distance, say 100 meters, if you are in a hurry?

Yes Question 54  
No

---

Question 60a

How tall are you?  
Number of centimetres.....

---

Question 60b

How much do you weigh?  
Number of kilograms.....



Country: Canada  
Survey: National Population Health Survey (NPHS)  
Survey Code: CA 03  
Year: 2005  
Type: Face to Face + Telephone

---

Question PA\_Q6

Thinking back over the past 3 months, which of the following best describes your usual daily activities or work habits?

Usually sit during the day and don't walk around very much

Stand or walk quite a lot during the day but don't have to carry or lift things very Often

Usually lift or carry light loads, or have to climb stairs or hills often

Do heavy work or carry very heavy loads

Country: Germany  
Survey: Telephone Health Survey 2004-2005  
Survey Code: DE 07  
Year: 2005  
Type: Telephone

---

Question 234

In addition to sport, are you physically active in any way which helps to keep you healthy and fit?

Note: Meant here are physical activities which the interviewee would not count as sport, although it is regarded by some others as sport; for example, swimming, bicycling, hiking

yes  
no  
d.k.  
n.a./answer refused

---

Question 235

Leaving sport aside, are you physically active in some other way which helps to keep you healthy and fit?

Note: Meant here are physical activities which the interviewee would not count as sport, although it is regarded by some others as sport; for example, swimming, bicycling, hiking

yes  
no  
d.k.  
n.a./answer refused

Country: Denmark  
Survey: The Danish Health Interview Survey  
Survey Code: DK 03  
Year: 2005  
Type: Face to Face

---

#### Question 82

The next questions concern physical activity.

How many days a week are you physically active more than 30 minutes? Include moderate or vigorous physical activity where you increase your respiration, such as sports activities, strenuous gardening, walking rapidly, cycling at a moderate or rapid speed or physically strenuous work. Include work and leisure.

(The respondent should answer according to his or her current situation.)

- 0 days a week
  - 1 day a week
  - 2 days a week
  - 3 days a week
  - 4 days a week
  - 5 days a week
  - 6 days a week
  - 7 days a week
- 

#### Question 87

Do you know what the National Board of Health recommends for physical activity? (Until 1999, the National Board of Health recommended 4 hours of physical activity a week to positively affect health. The recommendation has since changed to 30 minutes of physical activity a day.

When the interviewer asks about the content of the recommendation, the interviewer must not indicate or mention the correct answer).

- Yes
  - No
- 

#### Question 87a

If yes:

What does the recommendation say?

- That people should be physically active more than 30 minutes a day
- That people should be physically active more than 4 hours a week
- Other, write: ...
- Do not know

---

Question 23 a-b

The next questions focus on how physically active you are. These questions differ from those you answered in the interview.

We are interested in finding out about the kinds of physical activities you do as part of your everyday life. The questions are about the time you spent being physically active in the last 7 days. They include questions about activities you do at work, as part of your house and yard work, to get from place to place, and in your spare time for recreation, exercise or sport.

State only the physical activities that you did for at least 10 minutes.

Vigorous physical activities refer to activities that take hard physical effort and make you breathe much harder than normal. Moderate activities refer to activities that take moderate physical effort and make you breathe somewhat harder than normal.

State how many days you were physical active

... days per week

State how much time you usually used per day

... hours

... minutes

How often during the last 7 days:

Did you do vigorous physical activities like heavy lifting, digging, aerobics, or fast bicycling?

Did you do moderate physical activities like carrying light loads, bicycling at a regular pace, or doubles tennis? Do not include walking

Did you walk? This includes walking at work and at home, walking to travel from place to place, and any other walking that you did solely for recreation, sport, exercise or leisure

Country: Finland  
Survey: Health Behaviour among the Finnish Adult Population  
Survey Code: FI 19  
Year: 2005  
Type: Self administered

---

Question 82

How would you rate your current (physical) fitness status?

very good  
quite good  
satisfactory  
rather poor  
very poor

---

Question 83

In the past year (12 months), have any of the persons mentioned below advised you to exercise more?

yes  
no

physician  
other health care provider  
family member  
other

---

Question 101

Are you a member in any society or organization?

no  
yes

health and/or patient-organization  
gymnastics and/or sports association  
other organization

Country: Finland  
Survey: Health Behaviour among the Finnish Elderly Population  
Survey Code: FI 20  
Year: 2005  
Type: Face to Face

---

Question 53

How often do you walk outdoors for at least half an hour?

- daily
  - 4 – 6 times a week
  - 2 – 3 times a week
  - once a week
  - 2 – 3 times a month
  - a few times a year or less
  - I cannot walk at all due to an illness or injury
- 

Question 54

How often do you perform other physical activities than walking for at least half an hour (e.g., skiing, bicycling, swimming, gymnastics, games, dance)?

- daily
  - 4 – 6 times a week
  - 2 – 3 times a week
  - once a week
  - 2 – 3 times a month
  - a few times a year or less
  - I cannot exercise at all due to an illness or injury
- 

Question 55

How would you rate your current (physical) fitness status?

- good
- rather good
- average
- rather poor
- poor

---

Question 70

Which of the activities mentioned below do you pursue outside your home?

yes

visiting friends, acquaintances and relatives in my home district

travelling (as a tourist)

sports events (as a spectator or participant)

dancing

clubs and associations

parish activities

theatre, cinema, concerts

games (chess, cards, ball games, etc.)

fishing or hunting

cottage life, camping

studying

homemaking, child care

light work, voluntary work

nothing

other, please specify: ...

---

Question 78

Exercising is always worthwhile

Fully agree

More or less agree

Don't know

Disagree to some extent

Fully disagree

Country: France  
Survey: Health Barometer  
Survey Code: FR 14  
Year: 2005  
Type: Telephone

---

#### Question Q74

We are interested in the different types of physical activity you have engaged in during the past seven days, at work, at home or in your garden, for travelling and during your free time.

First consider intense activities that require a major physical effort and that make you breathe much more deeply than normally.  
Think only of activities you engaged in for at least 10 minutes at a time.

During the past seven days, on how many days did you engage in intense physical activities such as carrying heavy loads, digging, cross-country cycling or playing football? Please do not include walking.

... days a week

---

#### Question Q75

In general, how long did you spend doing this intense physical activity during any one of these days (an average day)

... hours and ... minutes a day

---

#### Question Q76

Let us now turn to moderate activities that require a moderate physical effort and that make you breathe a little more deeply than normally.  
Think only of activities you engaged in for at least 10 minutes at a time.

During the past seven day, on how many days did you engage in moderate physical activity such as carrying light bags, vacuum cleaning, cycling slowly? Please do not include walking.

... days a week



---

Question Q77

In general, how long did you spend doing this moderate physical activity during any one of these days (an average day)

... hours and ... minutes a day

---

Question Q78

Let us now turn to walking.

This includes walking at work and at home, walking from one place to another, and any other kind of walking you may have done during your free time for leisure, sport, relaxation.

During the past seven days, on how many days did you walk for at least 10 minutes at a time?

... days a week

---

Question Q79

In general, how long did you walk during one of these days?

... hours and ... minutes a day

---

Question 82

We are interested in different types of physical activity you engaged in yesterday at work, at home or in your garden, for getting from one place to another and during your free time. First consider intense activities that required a major physical effort and that made you breathe much more deeply than normally. Think only of activities you engaged in for at least 10 minutes at a time.

Yesterday, did you engage in intense physical activity such as carrying a heavy load, digging, cross-country cycling or playing football? Please do not include walking.

Yes  
No  
DK

---

Question Q83

If Yes,

How long did you spend on these intense physical activities yesterday?

... hours and ... minutes

---

Question Q84

Let us now turn to moderate activities that require a moderate physical effort and that make you breath a little more deeply than normally.

Think only of activities you engaged in for at least 10 minutes at a time.

Yesterday, did you engage in moderate physical activity such as carrying light bags, vacuum cleaning, cycling slowly? Please do not include walking.

- Yes
  - No
  - DK
- 

Question Q85

How long did you spend on these moderate activities yesterday?

... hours and ... minutes

---

Question Q88

Let us now turn to walking.

This includes walking at work and at home, walking from one place to another, and any other kind of walking you may have done during your free time for leisure, sport, relaxation.

Yesterday, did you walk for at least 10 minutes at a time?

- Yes
  - No
  - DK
- 

Question Q89

For how long did you walk?

... hours and ... minutes

Country: Italy  
Survey: Health Conditions and the Use of Health Services 2004-2005  
Survey Code: IT 08  
Year: 2005  
Type: Face to Face

---

Question 17.2

How many hours and minutes per week, on average, do you devote to domestic and family-oriented work (housework, shopping, care of other family members)?

Do not carry out activities

N° hours: ...

N° minutes: ...

---

Question 17.3

Is your domestic and family-oriented work mainly characterised by physical activity?

Yes, light

Yes, moderate

Yes, heavy, till perspiring

Country: Lithuania  
Survey: Health Interview Survey of Lithuanian population in 2005  
Survey Code: LT 06  
Year: 2005  
Type: Face to Face

---

#### Question N01

We are interested in finding out about the kinds of physical activity that people do as a part of their everyday lives. I am going to ask you about the time spent being physically active in the last 7 days. Please answer each question even if you do not consider yourself to be an active person. I will be asking you about activities you do at work, to get from place to place, as a part of your house and yard work, in your spare time for recreation, exercise or sport.

Think about all vigorous activities that take hard physical effort that you did in the last 7 days. Vigorous activities make you breathe much harder than normal and may include heavy lifting, digging, fast bicycling or other hard physical work. Think about those physical activities that you did for at least 10 minutes at a time.

During the last 7 days on how many days did you do vigorous physical activities?

- ... day(s)
  - None
  - Don't know/No answer
- 

#### Question N02

How much time on the average per day do you spend doing vigorous physical activities? Think about those physical activities that you do at least 10 minutes at a time.

Interviewer: if the respondent cannot answer because the pattern of time spent varies widely from day to day, ask about the average time per week is being spent on vigorous physical activities?

- ... hours ... minutes per day
  - ... hours ... minutes per week
  - Don't know/No answer
- 

#### Question N03

Think about activities that take moderate physical effort that you did in the last 7 days. These activities make your breath and heart beat somewhat harder than normal and may include carrying light loads, bicycling at a regular pace, doubles tennis. Think about those physical activities that you do at least 10 minutes at a time.

During the last 7 days on how many days did you do moderate physical activities?

- ... day(s)
  - None
  - Don't know/No answer
- 

#### Question N04

How much time in the average per day do you spend doing moderate physical activities? Think about those physical activities that you do at least 10 minutes at a time.

Interviewer: if the respondent cannot answer because the pattern of time spent varies widely from day to day, ask about the average time per week is being spent on moderate physical activities.

- ... hours ... minutes per day
  - ... hours ... minutes per week
  - Don't know/No answer
- 

#### Question N05

Now think about the time you spent walking in the last 7 days. This includes walking to go to work and return from it, walking to travel from one place to another, from which you usually go by some transport, also any other walking.

During the last 7 days on how many days did you walk for at least 10 minutes at a time?

- ... day(s)
  - None
  - Don't know/No answer
- 

#### Question N06

How much time on the average per day did you spend walking? Think about walking that you do at least 10 minutes at a time.

Interviewer: if the respondent cannot answer because the pattern of time spent varies widely from day to day, ask about the average time per week is being spent walking.

- ... hours ... minutes per day
- ... hours ... minutes per week
- Don't know/No answer

Country: Poland  
Survey: National Multicenter Health Survey - Project WOBASZ  
Survey Code: PL 05  
Year: 2005  
Type: Face to Face

---

Question 5

Do you ever exercise (run, cycle, swim, train, garden) for at least 30 minutes without break?

yes  
no

---

Question 6

How often do you exercise like that?

every day  
almost every day (4-6 times a week)  
every second or third day  
once a week  
twice or three times a month  
once a month or rarely

---

Question 7

Why don't you exercises? (Please choose only one answer)

lack of time  
I don't want to  
no need to do it  
because of my health status  
I work very hard physically

Country: Portugal  
Survey: Fourth National Health Interview Survey  
Survey Code: PT 05  
Year: 2005  
Type: Face to Face

---

Question 0

ARE YOU] IS HE/SHE] ALWAYS BEDRIDDEN, SITTING ON A CHAIR ALL DAY OR CONFINED TO YOUR HOUSE?

Yes  
No  
Don't know

---

Question 1

THINK ABOUT EVERY VIGOROUS (ENERGIC) ACTIVITY, INCLUDING PROFESSIONAL ACTIVITY, YOU HAVE HE/SHE HAS DONE IN THE LAST 7 DAYS, WHICH REQUIRED HARD PHYSICAL EFFORT.

VIGOROUS ACTIVITIES ARE THOSE THAT LEAD TO BREATHING FASTER THAN NORMAL AND MAY INCLUDE LIFTING HEAVY WEIGHTS, DIGGING THE SOIL, PRACTICING AEROBIC GYMNASTICS, RUNNING, SWIMMING, PLAYING FOOTBALL OR CYCLING QUICKLY.

SO, I'D LIKE YOU TO THINK ABOUT JUST THOSE PHYSICAL ACTIVITIES, YOU HAVE HE/SHE HAS

DONE AT LEAST DURING 10 MIN

HOW MANY DAYS IN THE LAST 7 DAYS, HAVE YOU HAS HE/SHE DONE VIGOROUS PHYSICAL ACTIVITIES?

No day  
Don't know

---

Question 2

IN TOTAL, HOW MUCH TIME DID THOSE DAYS, DOING VIGOROUS PHYSICAL ACTIVITIES?

YOU/HE/SHE  USUALLY SPEND

... h ... m per day  
Don't know because the pattern varies a lot day to day

---

Question 3

IN TOTAL, HOW MUCH TIME DID YOU/HE/SHE SPEND IN THE LAST 7 DAYS, DOING VIGOROUS PHYSICAL ACTIVITIES?

... h ... m in the week  
Don't know

---

Question 4

NOW, THINK ABOUT THE ACTIVITIES, INCLUDING PROFESSIONAL ACTIVITY, YOU HAVE HE/SHE HAS DONE IN THE LAST 7 DAYS, WHICH REQUIRED MODERATE PHYSICAL EFFORT MODERATE PHYSICAL ACTIVITIES LEAD TO BREATHING A LITTLE FASTER THAN NORMAL AND MAY INCLUDE CARRYING SOFT WEIGHTS, CYCLING SLOWLY, HOUSE CLEANING, HOOVERING, GARDENING, HUNTING. WALKING IS NOT INCLUDED.

ONCE AGAIN, THINK ABOUT JUST THOSE PHYSICAL ACTIVITIES YOU HAVE HE/SHE HAS

DONE AT LEAST DURING 10 MINUTES AT O

HOW MANY DAYS IN THE LAST 7 DAYS, HAVE YOU HAS HE/SHE DONE MODERATE PHYSICAL ACTIVITIES?

No day  
Don't know

---

Question 5

IN TOTAL, HOW MUCH TIME DID YOU/HE/SHE USUALLY SPEND IN 1 OF THOSE DAYS, DOING MODERATE PHYSICAL ACTIVITIES?

... h ... m per day  
Don't know because the pattern varies a lot day to day

---

Question 6

IN TOTAL, HOW MUCH TIME DID YOU/HE/SHE SPEND IN THE LAST 7 DAYS, DOING MODERATE PHYSICAL ACTIVITIES?

... h ... m in the week  
Don't know

---

Question 7

THINK ABOUT THE TIME SPENT WALKING IN THE LAST 7 DAYS. THIS INCLUDES WALKING AT WORK AND AT HOME, MOVING FROM ONE PLACE TO ANOTHER, GOING FOR A WALK OR WALKING FOR EXERCISE.



HOW MANY DAYS IN THE LAST 7 DAYS, HAVE YOU HAS HE/SHE WALKED  
AT LEAST DURING 10 MINUTES AT ONCE?

No day  
Don't know

---

Question 8

IN TOTAL, HOW MUCH TIME DID YOU/HE/SHE USUALLY SPEND WALKING  
IN 1 OF THOSE DAYS?

... h ... m per day  
Don't know because the pattern varies a lot day to day

---

Question 9

IN TOTAL, HOW MUCH TIME DID YOU/HE/SHE SPEND WALKING IN THE  
LAST 7 DAYS?

... h ... m in the week  
Don't know

Country: Sweden  
Survey: National Survey of Public Health  
Survey Code: SE 05  
Year: 2005  
Type: ???

---

Question 37

How much time in a normal week do you do moderately strenuous activities that make you hot? E.g. walks at a brisk pace, gardening, fairly hard housework, cycling, swimming. This may vary during the year, but try and give some kind of an average. Mark one alternative.

- 5 hours a week or more
- More than 3 hours but less than 5 hours a week
- Between 1 and 3 hours a week
- At most one hour a week
- Not at all

Country: United Kingdom  
Survey: Health Survey for England  
Survey Code: UK 31  
Year: 2005  
Type: Face to Face

---

Question Wlk5Ch

Now I'd like to ask you about some of the things you have/(name of child) has done in the last week. By last week I mean last (day one week ago) up to yesterday. In the last week, have you/has s/he done a continuous walk that lasted at least 5 minutes not counting things done as part of school lessons?

Yes  
No

---

Question DaysWlk

On how many days in the last week did you/(name of child) do a continuous walk that lasted at least 5 minutes not counting things done as part of school lessons?

One day  
Two days  
Three days  
Four days  
Five days  
Six days  
Every day

---

Question DayWlkT

On each day that you/(name of child) did a walk like this for at least 5 minutes, how long did you/s/he spend walking altogether?  
Please give an answer from this card

5 minutes, less than 15 minutes  
15 minutes, less than 30 minutes  
30 minutes, less than 1 hour  
1 hour, less than 1 1/2 hours  
1 1/2 hours, less than 2 hours  
2 hours, less than 2 1/2 hours  
2 1/2 hours, less than 3 hours  
3 hours, less than 3 1/2 hours  
3 1/2 hours, less than 4 hours  
4 hours or more (please specify how long)

---

Question WlkHrs

How long did you/(name of child) spend walking on each day?

...

---

Question ChPace

Which of the following describes your usual walking pace

- ... a slow pace,
  - ... a steady average pace,
  - ... a fairly brisk pace,
  - ... or, a fast pace - at least 4 mph?
  - (None of these)
- 

Question Usual

Were the activities you/(name of child) did last week different from what you/s/he would usually do for any reason?

IF YES PROBE: Would you/s/he usually do more physical activity or less?

- No - same as usual
- Yes different - usually do more
- Yes different - usually do less

Country: Austria  
Survey: Health Interview Survey  
Survey Code: AT 06  
Year: 2006  
Type: Face to Face

---

Question D5.1

We are interested in finding out about the kinds of physical activity that people do as part of their everyday lives. I am going to ask you about the time you spent being physically active in the past seven days. Please answer each question, even if you do not consider yourself to be an active person. I will be asking you about activities you do at work, to get from place to place, as part of your house and yard work, and in your spare time for recreation, exercise or sport. Think about all the vigorous activities that take hard physical effort that you did in the last seven days. Vigorous activities make you breathe much harder than normal and may include heavy lifting, digging, aerobics or fast bicycling. Think about only those physical activities that you did for at least 10 minutes at a time.

During the last seven days, on how many days did you do vigorous physical activities?

... day(s) per week

---

Question D5.2

How much time in total did you usually spend on one of these days doing vigorous physical activities?

... hours ... minutes/day  
don't know

---

Question D5.2a

How much time in total would you spend in a usual week doing vigorous physical activities?

... hours ... minutes/week

---

Question D5.3

Now think about all the vigorous activities that take moderate physical effort that you did in the last seven days. Moderate physical activities make you breathe somewhat harder than normal and may include light loads, bicycling at a regular pace, or doubles tennis. Do not include walking. Again, think about only those physical activities that you did for at least 10 minutes at a time.

During the last seven days, on how many days did you do moderate physical activities?

... day(s) per week

---

Question D5.4

How much time in total did you usually spend on one of those days doing moderate physical activities?

... hours ... minutes/day  
don't know

---

Question D5.4a

How much time in total would you spend in a usual week doing moderate physical activities?

... hours ... minutes/week

---

Question D5.5

Now think about the time you spent walking in the last seven days. This includes walking at work and at home, walking to travel from place to place, and any other walking that you might do solely for recreation, sport, exercise or leisure.

During the last seven days, on how many days did walk for at least 10 minutes at a time?

... day(s) per week

---

Question D5.6

How much time in total did you usually spend walking on one of those days?

... hours ... minutes/day  
don't know

---

Question D5.6a

How much time in total would you spend in a usual week walking?

... hours ... minutes/week

---

Question D5.7

What describes best your leisure time activities during the last year?

Hard training and competitive sport more than once a week

Jogging and other recreational sports or heavy gardening, at least 4 hours a week

Jogging and other recreational sports or heavy gardening, less than 4 hours a week

Walking, bicycling or other light activities at least 4 hours a week

Walking, bicycling or other light activities less 4 hours a week

Reading, watching TV or other sedentary activities

---

Question D5.8

At least once a week do you engage in any regular activity, such as jogging, cycling, etc. long enough to work up sweat?

Yes

No

---

Question D5.9

How many days per week?

On ... Day(s) per week

Country: Serbia  
Survey: National Health Survey, Serbia 2006  
Survey Code: CS 01  
Year: 2006  
Type: Face to Face + self administered

---

Question SV45 a-b

Think about all the vigorous activities which demand heavy physical effort that you did in the last 7 days. Vigorous activities make you breathe much harder than normal and may include heavy lifting, digging, aerobics or fast bicycling. Think only about those physical activities that you did for at least 10 minutes at the time.

During the last 7 days, on how many days did you do vigorous physical activities last week?

... days  
Do not want to answer  
Do not know

How much time did you usually spend doing vigorous physical activities on one of those days?

... hours ... minutes

---

Question SV6 a-b

Think about activities which take moderate physical effort that you did in the last 7 days. Moderate activities make you breathe slightly somewhat harder than normal and include carrying light loads bicycling at a regular pace, or doubles tennis. Do not include walking. Again, think only those physical activities that you did for at least 10 minutes at the time.

During the last 7 days, on how many days did you do moderate physical activities last week?

... days  
Do not want to answer  
Do not know

How much time did you usually spend doing moderate physical activities on one of those days?

... hours ... minutes



---

Question ZZ4

How do you estimate your physical activity? (One answer)

- Very bad
  - Bad
  - Fair
  - Good
  - Very good
- 

Question SV6

How many hours a week do you practice physical activity until you start sweating and start breathing faster (excluding school activities)?

- Up to 1 hour
  - 2-3 hours
  - 4-6 hours
  - 7 or more than 7 hours
- 

Question SV7 a-b

Now think about time you spent walking in the last 7 days. This includes at work/school and at home, walking to travel to place to place, and any other walking that you might do solely for recreation, sports, exercise or leisure.

During the last 7 days, on how many days did you walk for at least 10 minutes at a time?

- ... days
- Do not want to answer
- Do not know

How much time did you usually spend walking on one of those days?

- ... hours ... minutes
- 

Question SV9

Think about all the vigorous activities which demand heavy physical effort that you did in the last 7 days. Vigorous activities make you breathe much harder than normal and may include heavy lifting, digging, aerobics or fast bicycling. Think only about those physical activities that you did for at least 10 minutes at the time.

During the last 7 days, on how many days did you do vigorous physical activities last week?

- ... days
- Do not want to answer
- Do not know

How much time did you usually spend doing vigorous physical activities on one of those days?

... hours ... minutes

---

Question SV10

Think about activities which take moderate physical effort that you did in the last 7 days. Moderate activities make you breathe slightly somewhat harder than normal and include carrying light loads bicycling at a regular pace, or doubles tennis. Do not include walking. Again, think only those physical activities that you did for at least 10 minutes at the time.

During the last 7 days, on how many days did you do moderate physical activities last week?

... days

Do not want to answer

Do not know

How much time did you usually spend doing moderate physical activities on one of those days?

... hours ... minutes

---

Question SV11

Now think about time you spent walking in the last 7 days. This includes at work/school and at home, walking to travel to place to place, and any other walking that you might do solely for recreation, sports, exercise or leisure.

During the last 7 days, on how many days did you walk for at least 10 minutes at a time?

... days

Do not want to answer

Do not know

How much time did you usually spend walking on one of those days?

... hours ... minutes

Country: Germany  
Survey: Telephone Health Survey 2005-2006  
Survey Code: DE 08  
Year: 2006  
Type: Telephone

---

Question 141

In addition to sport, are you physically active in any way which helps to keep you healthy and fit?

Meant here are physical activities which the interviewee would not count as sport, although it is regarded by some others as sport; for example, swimming, bicycling, hiking

yes  
no  
d.k.  
n.a./answer refused

---

Question 142

Leaving sport aside, are you physically active in some other way which helps to keep you healthy and fit?

Meant here are physical activities which the interviewee would not count as sport, although it is regarded by some others as sport; for example, swimming, bicycling, hiking

yes  
no  
d.k.  
n.a./answer refused

Country: Estonia  
Survey: Estonian Health Interview Survey 2006  
Survey Code: EE 08  
Year: 2006  
Type: Face to Face

---

Question T11

Physical activity is any activity that causes your heart to palpitate and makes you gasp for a period. Physical activity can be an intensive sports training that is aimed for high results or recreational sports for enjoying the activity. The activities that are connected with your daily work should also be included in physical activity. These activities should last at least for 10 minutes during a half an hour period and for at least 30 minutes per day. In addition to sports, physical activity involves also several leisure time activities connected with physical movements, such as Nordic walking, longer walks and cycling (also to and from work) and other physical activities of the same level of difficulty.

Have you had moderate-intensity physical exercises such as Nordic walking, longer walks (also to and from work), cycling (also to and from work) or been involved in any other easier physical activity during the last 4 weeks?

Yes  
No

---

Question T12

How many hours per week have you been involved in moderate-intensity physical activity during the last 4 weeks?

... hours

---

Question T13

Now we are going to talk about physical activity and exercises that can be called active exercises. These include jogging, ball games, swimming, skating, dancing and also harder garden work.

Have you ever in your life been involved in active exercises? These include jogging, other recreational sports and harder garden work.

Yes  
No

---

Question T14

Have you participated in active exercises during the last 4 weeks?

- Yes
  - No
- 

Question T15

How often did you participate in active exercises during the last 4 weeks?

- Almost every day
  - 3 – 4 times a week
  - 1 – 2 times a week
  - 1 – 3 times a month
- 

Question T16

How many hours per week did you participate in active exercises during the last 4 weeks?

... hours

---

Question T17

The following questions are connected with intensive sports activities.

Have you ever in your life been involved in intensive training or competitive sports, i.e. at least 3-4 training sessions per week, during at least one year?

- Yes
  - No
- 

Question T18

Have you participated in intensive training or competitive sports, i.e. at least 3-4 training sessions per week, during the last 4 weeks?

- Yes
- No

---

Question T19

How often did you participate in intensive training or competitive sports, i.e. 3-4 training sessions a week, during the last 4 weeks?

Every day/almost every day  
3 – 4 times a week

---

Question T20

Are you physically inactive for more than two hours in a row (for example reading, sitting at the computer, watching TV)?

Yes  
No

---

Question T21

How many hours a week are you usually physically inactive (for example reading, sitting at the computer, watching TV)?

... hours

Country: Spain  
Survey: National Health Survey  
Survey Code: ES 06  
Year: 2006  
Type: Face to Face

---

Question 90

Which of the following possibilities best describes your main activity at your place of work, education centre, home (household chores), etc?

- Seated most of the day
  - Standing up most of the day, without moving around a lot or making a great deal of effort
  - Walking, carrying a bit of weight, moving around frequently
  - Doing tasks requiring a great deal of physical effort
- 

Question 93

Do you regularly do any physical activity like walking, doing sport or going to the gym in your free time?

- Yes
  - No, I don't normally do physical exercise
- 

Question 94

Could you tell me how often you have done the activities set out below for over 20 minutes in the last two weeks?

N° of times: ...

- A light physical activity like walking, gardening, easy gym activities, games that require little effort or similar activities
- A moderate physical activity like riding a bicycle, gymnastics, aerobics, running or swimming
- An intense physical activity like football, basketball, competitive cycling or swimming, judo karate or similar activities

Country: France  
Survey: National survey on nutrition and health (ENNS)  
Survey Code: FR 18  
Year: 2006  
Type: Face to Face

---

#### Question PA48

The questions I am going to ask you first of all concern the time you spent being physically active during the past week. This includes the seven previous days up until yesterday included (including the weekend).

This includes activities at work or school, at home or in your garden, to get from one place to another, or during leisure or sports activities.

Answer all the questions even if you do not consider yourself to be a physically active person.

The time devoted to intense physical activities

The first question concerns intense physical activity. This means activities that required you to make a major physical effort and that made you breathe with much more difficulty than normally.

Think of moments when, for example, you carried heavy loads, dug your garden, went cross-country cycling, played football or did step aerobics.

During the past week, including the weekend, on how many days do you undertake this kind of intense physical activity?

Only include activities you engaged in for at least 10 minutes without interruption.

... days/7 days

Refuses to answer

Doesn't know

---

#### Question PA49

Now think of one of these days in the past week when you engaged in one or more intense physical activities. How much time in total did you spend on them?

on one of these days ... hours ... minutes

Refuses to answer

Doesn't know



---

Question PA50

The time spent on moderate physical activity

The second question concerns moderate physical activity. This means activities that required you to make a moderate physical effort and that made you breathe with a little more difficulty than usual.

Think of times when you carried moderate loads (5-10 kg), did the vacuum cleaning, went for a quiet bicycle ride, or played some volley ball.

Again, think only of activities you engaged for at least 10 minutes without interruption.

During the past week, including the weekend, on how many days did you engage in this type of moderate physical activity? Do not include walking

... days/7 days

Refuses to answer

Doesn't know

---

Question PA51

Now think of one of these days in the past week when you engaged in moderate physical activity. How much time in total did you spend engaged in this activity?

On one of these days ... hours ... minutes

Refuses to answer

Doesn't know

---

Question PA52

During the past week, including the weekend, on how many days did you walk for at least 10 minutes without interruption?

... days/7 days

Refuses to answer

Doesn't know

---

Question PA53

Now think of one of these days in the past week when you walked. For how long did you walk?

on one of these days ... hours ... minutes

Refuses to answer

Doesn't now

---

Question E17

Do you believe you are physically active?

Yes  
No  
Refuses to answer

---

#### Question E53

The following questions concern the physical activity and sedentariness of your child during the past week, that is, on the seven days including yesterday.

It is possible that you do not know exactly how to answer the questions; try to be as close as possible to what you have seen.

II. During the past week, how much time did your child spend watching television in all (video cassette and DVD included)?

For children attending neither school or crèche, or interviewed during holidays

Total time per day: ... Hours ... minutes  
Refusal  
Doesn't know

---

#### Question E54

The following questions concern the physical activity and sedentariness of your child during the past week, that is, on the seven days including yesterday.

It is possible that you do not know exactly how to answer the questions; try to be as close as possible to what you have seen.

II. During the past week, how much time did your child spend watching television in all (video cassette and DVD included)?

For children attending school (or a crèche)

School days (Monday, Tuesday, Thursday, Friday) ... Hours ... minutes  
Days with little school (Wednesday or Saturday) ... Hours ... minutes  
Days with no school (Wednesday or Saturday, Sunday) ... Hours ... minutes  
Refuses to answer  
Doesn't know

---

#### Question E61

In your opinion, is your child active?

Yes  
No  
Doesn't know  
Refuses to answer

---

#### Question A8

Do you regularly engage in a physical activity to reduce your blood pressure?

(fast walking, sport, gardening, etc.)

Yes  
No

---

Question A13

Do you regularly engage in a physical activity to reduce your cholesterol?  
(fast walking, sport, gardening, etc.)

Yes  
No

---

Question A21

Do you regularly engage in a physical activity to reduce your glycaemia?  
(fast walking, sport, gardening, etc.)

Yes  
No

---

Question PA.67

How did you try to loose weight ? (more than one answer possible)

By modifying your feeding behaviour  
By increasing your physical activity  
Other :meal substitutes, diet complements, medicinal herbs, laxatives, etc (Explain): ...

---

Question PA.69

How did you try not to gain weight? (more than one answer possible)

By modifying your feeding behaviour  
By increasing your physical activity  
Other: meal substitutes, diet complements, medicinal herbs, laxatives, etc (Explain) ...

Country: Lithuania  
Survey: Lithuanian health behaviour monitoring  
Survey Code: LT 05  
Year: 2006  
Type: Self administered

---

Question 77

During the last year (12 months) have you been advised to increase your physical activity by any of the following:

yes  
no

a doctor  
other health care personnel  
a family member  
others

Country: International  
Survey: European Core Health Interview Survey - ECHIS  
Survey Code: REC 04  
Year: 2006  
Type: Face to Face

---

Question PE.1

Now I am going to ask you about the time you spent being physically active in the past 7 days. Please answer each question even if you do not consider yourself to be an active person. Think about the activities you do at work, as part of your house and yard work, to get from place to place, and in your spare time for recreation, exercise or sport.

Think about all the vigorous activities which take hard physical effort that you did in the last 7 days. Vigorous activities make you breathe much harder than normal and may include heavy lifting, digging, aerobics, or fast bicycling. Think only about those physical activities that you did for at least 10 minutes at a time.

During the past 7 days, on how many days did you do vigorous physical activities?

... Days per week  
don't know  
refusal

---

Question PE.2

During the past 7 days, how much time did you spend doing vigorous physical activities?

... hours ... minutes  
don't know  
refusal

---

Question PE.3

Now think about activities which take moderate physical effort that you did in the past 7 days. Moderate physical activities make you breathe somewhat harder than normal and may include carrying light loads, bicycling at a regular pace, or doubles tennis. Do not include walking. Again, think about only those physical activities that you did for at least 10 minutes at a time.

During the past 7 days, on how many days did you do moderate physical activities?

... Days per week  
don't know  
refusal

---

Question PE.4

During the past 7 days, how much time did you spend doing moderate physical activities?

... hours ... minutes  
don't know  
refusal

---

Question PE.5

Now think about the time you spent walking in the past 7 days. This includes at work and at home, walking to travel from place to place, and any other walking that you might do solely for recreation, sport, exercise, or leisure.

During the past 7 days, on how many days did you walk for at least 10 minutes at a time?

... Days per week  
don't know  
refusal

---

Question PE.6

INTERVIEWER CLARIFICATION: THINK ONLY ABOUT THE WALKING THAT YOU DO FOR AT LEAST 10 MINUTES AT A TIME.

During the past 7 days, how much time did you spend walking?

... hours ... minutes  
don't know  
refusal

Country: United Kingdom  
Survey: Health Survey for England  
Survey Code: UK 33  
Year: 2006  
Type: Face to Face

---

Question Wlk5Ch

Now I'd like to ask you about some of the things you have/(name of child) has done in the last week. By last week I mean last (day one week ago) up to yesterday. In the last week, have you/has s/he done a continuous walk that lasted at least 5 minutes not counting things done as part of school lessons?

Yes  
No

---

Question DaysWlk

On how many days in the last week did you/(name of child) do a continuous walk that lasted at least 5 minutes not counting things done as part of school lessons?

One day  
Two days  
Three days  
Four days  
Five days  
Six days  
Every day

---

Question DayWlkT

On each day that you/(name of child) did a walk like this for at least 5 minutes, how long did you/s/he spend walking altogether?

What we want recorded is the average time spent walking per weekday. If the respondent walked for over 5 minutes on more than one day in the last week, take an average of the time spent per day

5 minutes, less than 15 minutes  
15 minutes, less than 30 minutes  
30 minutes, less than 1 hour  
1 hour, less than 1 1/2 hours  
1 1/2 hours, less than 2 hours  
2 hours, less than 2 1/2 hours  
2 1/2 hours, less than 3 hours  
3 hours, less than 3 1/2 hours  
3 1/2 hours, less than 4 hours  
4 hours or more (please specify how long)

---

Question WlkHrs

How long did you/(name of child) spend walking on each day?  
RECORD HOURS SPENT BELOW

...

RECORD HERE MINUTES SPENT WALKING.

...

---

Question ChPace

Which of the following describes your usual walking pace ...

- ... a slow pace,
  - ... a steady average pace,
  - ... a fairly brisk pace,
  - ... or, a fast pace - at least 4 mph?
  - ... None of these
- 

Question Wlk5Int

I'd like you to think about all the walking you have done in the past four weeks either locally or away from here. Please include any country walks, walking to and from work and any other walks that you have done. In the past four weeks, that is since (date four weeks ago), have you done a continuous walk that lasted at least 5 minutes?

- Yes
  - No
  - Can't walk at all
- 

Question Wlk30M

In the past four weeks, have you done a continuous walk that lasted at least 30 minutes? (That is since (date four weeks ago)

- Yes
- No

During the past four weeks, on how many days did you do a walk of at least 30 minutes? (That is since (date four weeks ago)

...



---

Question Wlk15M

In the past four weeks, have you done a continuous walk that lasted at least 15 minutes? (That is since (date four weeks a go)

- Yes
- No

---

Question DayWlk

During the past four weeks, on how many days did you do a walk of at least 15 minutes? (That is since (date four weeks a go)

...

On that day, did you do more than one walk lasting at least 15 minutes?

- Yes, more than one walk of 15 + mins (on at least one day)
- No, only one walk of 15 + mins a day

On how many days in the last four weeks did you do more than one walk that lasted at least 15 minutes?

...

---

Question HrsWlk

How long did you usually spend walking each time you did a walk for 15 minutes or more? If very different lengths, probe for most regular. Record hours spent below.

...

Record here minutes spent walking.

...

---

Question WalkPace

Which of the following best describes your usual walking pace ...

- ... a slow pace,
- ... an average pace,
- ... a fairly brisk pace,
- ... or, a fast pace - at least 4 mph?
- None of these

Country: United States  
Survey: National Health Interview Survey  
Survey Code: US 04  
Year: 2006  
Type: Face to Face + Telephone

---

Question ACN.290\_02

Has a doctor or other health professional EVER suggested physical activity or exercise to help your arthritis or joint symptoms?

Yes  
No  
Refused  
Don't know

---

Question ACN.535\_02

DURING THE PAST 12 MONTHS, have you been told by a doctor or health professional to increase your physical activity or exercise?

Yes  
No  
Refused  
Don't know

---

Question ACN.540\_02

DURING THE PAST 12 MONTHS, have you  
... increased your physical activity or exercise?

Yes  
No  
Refused  
Don't know

Country: Australia  
Survey: National Health Survey  
Survey Code: AU 04  
Year: 2007  
Type: Face to Face

---

Question EXER\_Q07

The next few questions are about moderate and vigorous exercise. Please exclude walking that you may have done for fitness, recreation or sport, and household chores, gardening or yardwork.

In the last 2 weeks, did [you/proxy name] do any exercise which caused a moderate increase in [your/his/her] heart rate or breathing, that is, moderate exercise?

Yes  
No

---

Question EXER\_Q08

How many times did [you/proxy name] do any moderate exercise in the last 2 weeks?

...

---

Question EXER\_Q09

What was the total amount of time [you/proxy name] spent doing moderate exercise in the last 2 weeks?

hours: ...  
minutes: ...

---

Question EXER\_Q10

How many days in the last week did [you/proxy name] do any moderate exercise?

...

---

Question EXER\_Q12

What was the total amount of time [you/proxy name] spent doing moderate exercise in the last week?

hours: ...  
minutes: ...

---

Question EXER\_Q13

In the last 2 weeks, did [you/proxy name] do any (other) exercise which caused a large increase in [your/his/her] heart rate or breathing, that is, vigorous exercise?

Yes  
No

---

Question EXER\_Q14

How many times did [you/proxy name] do any vigorous exercise in the last 2 weeks?

...

---

Question EXER\_Q15

What was the total amount of time [you/proxy name] spent doing vigorous exercise in the last 2 weeks?

hours: ...  
minutes: ...

---

Question EXER\_Q17

How many days last week did [you/proxy name] do any vigorous exercise?

...

---

Question EXER\_Q19

What was the total amount of time [you/proxy name] spent doing vigorous exercise in the last week?

hours: ...  
minutes: ...

---

Question EXER\_Q19a

Thinking about the types of exercise you have already told me about, that is (walking for fitness, recreation or sport, moderate or vigorous exercise), how many days in the last week did [you/proxy name] exercise?

...

---

Question EXER\_Q19aa

Thinking about all the physical activity [you/proxy name] typically [do/does] now, would you say [you are/he is/she is] more active than this time last year, less active or stayed about the same as this time last year?

- More active
  - Less active
  - Stayed about the same
  - Don.t know
- 

Question DIABMED\_Q12

(Apart from insulin, medication or being on a special diet.)  
In the last 2 weeks, [have you/has (proxy name)] taken any other action to manage [your/his/her] [diabetes/high sugar levels]?

- Yes
- No

Which ones? More than one response is allowed.

- Losing weight
- Exercised most days
- Taken vitamin/mineral supplements
- Taken natural/herbal treatments
- Other

Country: Canada  
Survey: Canadian Health Measures Survey  
Survey Code: CA 04  
Year: 2007  
Type: Face to Face

---

Question PAC\_Q23

Thinking back over the past 3 months, which of the following best describes your usual daily activities or work habits?

- Usually sit during the day and don't walk around very much
  - Stand or walk quite a lot during the day but don't have to carry or lift things very often
  - Usually lift or carry light loads, or have to climb stairs or hills often
  - Do heavy work or carry very heavy loads
- 

Question CPA\_Q11

Physical activity is any activity that increases your heart rate and makes you get out of breath some of the time. It can be done in sports, school activities, playing with friends, or walking to school.

Some examples of physical activity are running, brisk walking, dancing, swimming, rollerblading, skateboarding, biking, soccer, basketball and, football.

For these next two questions, add up all the time [RESPONDENT NAME] spends in physical activity each day.

Over the past 7 days, on how many days was he physically active for a total of at least 60 minutes per day?

- None (zero days)
  - 1 day
  - 2 to 3 days
  - 4 days or more
- 

Question CPA\_Q12

Over a typical or usual week, on how many days is he physically active for a total of at least 60 minutes per day?

- None (zero days)
- 1 day
- 2 to 3 days
- 4 days or more

Country: Canada  
Survey: Canadian Community Health Survey (CCHS)  
Survey Code: CA 05  
Year: 2007  
Type: Face to Face + Telephone

---

Question STC Q1\_6

How often do you jog or do other exercise to deal with stress?

Often  
Sometimes  
Rarely  
Never

Country: Switzerland  
Survey: Swiss Health Survey  
Survey Code: CH 03  
Year: 2007  
Type: Telephone + self administered

---

Question 46.02

And how many days per week do you work up a sweat (on average) while working, either in your job or working at home or in the garden?

... days per week (0 to 7 days)  
No answer

---

Question 46.10

The next question is not about activities that make you work up a sweat but about less intensive forms of physical activity:  
Think of physical activities in which you get at least a little out of breath, such as brisk walking, hiking, dancing, gardening and various sports:

How many days per week do you engage in these kinds of physical activities?

... days per week (1 to 7 days)  
Never  
Don't know  
No answer

---

Question 46.11

What is the average duration of these physical activities on these days?

... hours and ... minutes per day  
Don't know  
No answer

---

Question 46.40

Do you think that you do enough physical exercise for your health?

Yes  
No  
Don't know  
No answer



Country: Germany  
Survey: Telephone Health Survey  
Survey Code: DE 09  
Year: 2007  
Type: Telephone

---

#### Questions 228-229

The following questions deal with physical activity in day-to-day life, leisure time and occupation. We will ask you about very strenuous activities and moderately strenuous activities. "Very strenuous" are those activities where you have to breathe much harder than usual. "Moderately strenuous" are those activities where you have to breathe a little harder than usual. Finally, we will ask you about the time you spend walking or running in everyday life, leisure time or occupation.

... we will start out with very strenuous activities where you have to breathe much harder than usual, e.g. fast bike riding, heavy construction work or work in the forest, digging soil (e.g. when cultivating a garden) or shovelling snow. How many days out of the last 7 days did you do these types of activities? Please only think of those activities that lasted at least 10 minutes.

...  
never  
d.k.  
n.a.

---

#### Questions 230-231-232

... on the days when you are doing these very strenuous activities, how many minutes or hours do you usually spend doing them?

...  
d.k.  
n.a.

... on the days when you are doing these very strenuous activities, how many minutes or hours do you usually spend doing them?

...  
d.k.  
n.a.

Can you tell me approximately how many minutes or hours total you spent doing this, within the last 7 days?

...  
d.k.  
n.a.

---

Question 234

And now on to the moderately strenuous activities where you have to breathe a little harder than usual, e.g. riding a bike at a moderate speed, painting rooms, house cleaning or scrubbing the floor. How many days out of the last 7 days did you do these types of activities? Please think only of those activities that lasted at least 10 minutes.

...  
never  
d.k.  
n.a.

---

Questions 235-236-237

... the days that you are doing these moderately strenuous activities, how many minutes or hours do you usually spend doing them?

...  
d.k.  
n.a.

... the days that you are doing these moderately hard activities, how many minutes or hours do you usually spent doing them?

...  
d.k.  
n.a.

Can you tell me within the last 7 days, how many minutes or hours in total you spent doing this?

...  
d.k.  
n.a.

---

Question 239

Now we are going to talk about walking in everyday life, leisure time and occupation. How many days within the last 7 days did you walk for at least 10 consecutive minutes?

...  
never  
d.k.  
n.a.

---

Questions 240-241-242

... and on the days when you are walking for at least 10 consecutive minutes, how many minutes or hours did you usually spend doing this?

...  
d.k.  
n.a.

... and on the days when you are walking for at least 10 consecutive minutes, how many minutes or hours did you usually spend doing this?

...  
d.k.  
n.a.

Can you tell me the total time in minutes or hours you spent doing this within the last 7 days?

...  
d.k.  
n.a.

---

Question 244

All together, do you think you do not get enough physical activity, enough physical activity or too much physical activity?

not enough  
enough  
too much  
d.k.  
n.a.

Country: Finland  
Survey: FINRISK 2007  
Survey Code: FI 21  
Year: 2007  
Type: Self administered

---

Question 84

How do you consider your current physical condition?

very good  
quite good  
fair  
quite bad  
very bad

Country: Finland  
Survey: Health Behaviour and Health among the Finnish Adult Population  
Survey Code: FI 22  
Year: 2007  
Type: Self administered

---

Question 77

How would you rate your current (physical) fitness status?

very good  
quite good  
satisfactory  
rather poor  
very poor

---

Question 78

In the past year (12 months), have any of the persons mentioned below advised you to exercise more?

yes  
no

physician  
other health care provider  
family member  
other

Country: Finland  
Survey: Health Behaviour and Health among the Finnish Elderly Population  
Survey Code: FI 23  
Year: 2007  
Type: Self administered

---

Question 46

In the past year (12 months), have you changed your diet or other habits for health reasons?

yes

reduced the amount of fat  
switched to a different type of fat  
increased the consumption of vegetables  
reduced the use of sugar  
reduced the use of salt  
quit smoking  
reduced the use of alcohol  
exercised more  
been on weight reducing diet

---

Question 54

How often do you perform other physical activities than walking for at least half an hour (e.g. skiing, bicycling, swimming, gymnastics, games, dance)?

daily  
4–6 times a week  
2–3 times a week  
once a week  
2–3 times a month  
a few times a year or less  
I cannot exercise at all due to an illness or injury

---

Question 55

How would you rate your current (physical) fitness status?

good  
rather good  
average  
rather poor  
poor

---

Question 58

In the past year (12 months), has a health provider (e.g. physician, a public health nurse) advised you to:

yes

reduce the amount of fat in your food  
switch to a different type of fat in your food  
increase the consumption of vegetables  
reduce the use of sugar  
reduce the use of salt  
quit smoking  
reduce the use of alcohol  
exercise more  
lose weight

---

Question 78

Exercising is always worthwhile

fully agree  
more or less agree  
don't know  
disagree to some extent  
fully disagree

Country: Ireland  
Survey: Survey of Lifestyles, Attitudes and Nutrition SLAN  
Survey Code: IE 09  
Year: 2007  
Type: Face to Face

---

#### Question B1

We are interested in finding out about the kinds of physical activities that people do as part of their everyday lives.

First, consider a 7 day period (a week). How many times on average do you do the following kinds of exercise for more than 20 minutes during your free time?

Strenuous exercise (heart beats rapidly) (e.g. running, jogging, hurling, camogie, football, soccer, squash, basketball, judo, roller skating, vigorous swimming, vigorous long distance cycling, advanced aerobics)

Moderate exercise (not exhausting) (e.g. fast walking, tennis, badminton, easy swimming, easy cycling, popular and folk dancing, intermediate aerobics, heavy gardening)

Mild exercise (minimal effort) (e.g. yoga, golf, easy walking, fishing from river bank, bowling, beginners aerobics, archery, light gardening)

... times

---

#### Question B2

How many days, if any, in an average week do you walk for 30 minutes or more?

... days

---

#### Question B3

I am going to ask you about the time you spent being physically active in the last 7 days.

Please answer each question even if you do not consider yourself to be an active person. Think about the activities you do at work, as part of your housework and in the garden, to get from place to place, and in your spare time for recreation, exercise or sport.

Think about all the vigorous activities that you did in the last 7 days. Vigorous physical activities refer to activities that take hard physical effort and make you breathe much harder than normal. Think only about those physical activities that you did for at least 10 minutes at a time.

During the last 7 days, on how many days did you do vigorous physical activities like heavy lifting, digging, aerobics, or fast bicycling?



... days

---

Question B4

How much time did you usually spend doing vigorous physical activities on one of those days?

... / ... hours and minutes per day  
Not sure/don't know

---

Question B5

Think about all the moderate activities that you did in the last 7 days. Moderate activities refer to activities that take moderate physical effort and make you breathe somewhat harder than normal. Think only about those physical activities that you did for at least 10 minutes at a time.

During the last 7 days, on how many days did you do moderate physical activities like carrying light loads, bicycling at a regular pace, or doubles tennis? [Do not include walking].

... days  
None

---

Question B6

How much time did you usually spend doing moderate physical activities on one of those days?

... /... hours and minutes per day  
Not sure/don't know

---

Question B7a

Think about the time you spent walking in the last 7 days. This includes at work and at home, walking to travel from place to place, and any other walking that you might do solely for recreation, sport, exercise, or leisure.

During the last 7 days, on how many days did you walk at for at least 10 minutes at a time?

... days per week  
None

---

Question B7b

Which of the following best describes your usual walking pace?

- A slow pace
  - A steady average pace
  - A fairly brisk pace
  - A fast pace – at least 4 mph
- 

#### Question B8

How much time did you usually spend walking on one of those days?

- ... / ... hours and minutes per day
  - Not sure/don't know
- 

#### Question B9

Thinking now about regular physical activity, by that I mean: taking part in exercise or sports 2-3 times per week for a minimum of 20 minutes at a time, or more general activities like walking, cycling or dancing 4-5 times per week accumulating to at least 30 minutes per day.

With this in mind, could you look at this card and tell me which statement best describes how physically active you have been over the last six months?

- I am not regularly physically active and do not intend to be so in the next six months
  - I am not regularly physically active but am thinking about starting to do so in the next six months
  - I do some physical activity but not enough to meet the description of regular physical activity
  - I am regularly physically active but only began in the last six months
  - I am regularly physically active and have been so for longer than six months
- 

#### Question B10

What would you say is the main reason why you are not (more) physically active at this time?

- Not interested
  - Interested but not willing to spend the time
  - No time to do it
  - No facilities to exercise/be active
  - Injury/disability/medical condition
  - Other, specify: ...
- 

#### Question B13

Are you using any of the following to lose/maintain weight?

- Eating fewer calories
- Eating less fat

Taking exercise

Yes

No

Country: Iceland  
Survey: Health and wellbeing of Icelanders  
Survey Code: IS 04  
Year: 2007  
Type: Self administered

---

Question 47

You are asked about both the number of days that you exercised in the last 7 days, and for how long you exercised in general the days in question. You are only asked about exercise that lasted 10 minutes or longer.

How many days in the last 7 days did you perform a strenuous exercise for at least 10 minutes that made your breathing become faster than usual, causing you to get winded. (An example of a strenuous exercise is aerobics, lifting a heavy object, ball sports, brisk mountaineering, running, bicycling or swimming fast.)

- 1 day in the previous week
  - 2 days in the previous week
  - 3 days in the previous week
  - 4 days in the previous week
  - 5 days in the previous week
  - 6 days in the previous week
  - 7 days in the previous week
  - I didn't do any strenuous exercise last week
- 

Question 48

How much time, in minutes, did you generally spend doing strenuous exercise for the days in the previous week that question 47 asks?

... minutes per day

---

Question 49

How many days of the last 7 days did you do a moderately strenuous exercise for at least 10 minutes, that made your breathing become a little faster than usual. Do not include hikes or walks. (Examples of a moderately strenuous exercise are home cleaning, playing golf, slow bicycling, slow jogging or slow swimming.)

- 1 day in the previous week
- 2 days in the previous week
- 3 days in the previous week
- 4 days in the previous week
- 5 days in the previous week

6 days in the previous week  
7 days in the previous week  
I didn't do any moderately strenuous exercise last week

---

Question 50

How much time, in minutes, did you generally spend doing moderately strenuous exercise for the days in the previous week that question 49 asks?

... minutes a day

---

Question 51

How many days of the last 7 days did you walk for at least 10 minutes a day?  
(Example: Walking between two places, walking to work and strolls, hiking is not included.)

1 day in the previous week  
2 days in the previous week  
3 days in the previous week  
4 days in the previous week  
5 days in the previous week  
6 days in the previous week  
7 days in the previous week  
I didn't walk at all in the previous week

---

Question 52

How much time a day did you generally spend walking for the days in the previous week that question 51 asks?

About 10-15 minutes  
About 16-30 minutes  
Just over half an hour  
About 1 hour  
About 2 hours  
About 3 hours  
About 4 hours or more  
Does not apply

---

Question 55

How frequently, if any, do you generally take advantage of the following outdoor areas?

Every day  
Three to six times a week  
One to two times a week  
One to three times a month  
Less than once a month

Never

Outdoor area (such as bicycle or walking trails by a beach or in a vegetation area)  
Open natural terrain

---

Question 57

As a general rule, how would you consider your physical endurance (stamina) in comparison to your peers of the same sex?

- A lot better than my peers
  - Considerably better than my peers
  - Similar to my peers
  - Considerably worse than my peers
  - A lot worse than my peers
- 

Question 58

As a general rule, how would you consider your physical strength in comparison to your peers of the same sex?

- A lot better than my peers
- Considerably better than my peers
- Similar to my peers
- Considerably worse than my peers
- A lot worse than my peers

Country: Luxembourg  
Survey: PSELL/EU-SILC  
Survey Code: LU 04  
Year: 2007  
Type: Face to Face

---

Question D187

Do you do a physical activity?

- Yes, regularly
  - Yes, sometimes
  - No, because of health problems
  - No, for other reasons
- 

Question D188

Do you do a physical activity or an artistic activity out of your home?

- Yes, regularly
- Yes, sometimes
- No, because of health problems
- No, for other reasons

Country: Sweden  
Survey: National Survey of Public Health  
Survey Code: SE 09  
Year: 2007  
Type: ???

---

Question 37

How much time in a normal week do you do moderately strenuous activities that make you hot? E.g. walks at a brisk pace, gardening, fairly hard housework, cycling, swimming. This may vary during the year, but try and give some kind of an average. Mark one alternative.

- 5 hours a week or more
- More than 3 hours but less than 5 hours a week
- Between 1 and 3 hours a week
- At most one hour a week
- Not at all



Country: Sweden  
Survey: Swedish Level of Living Survey  
Survey Code:  
Year: 2007  
Type: Face to Face

---

Question 283

Do you pursue any sports, outdoor or exercise activities, e.g. long walks?

How often?

YES, SEVERAL TIMES A WEEK  
YES, ABOUT ONCE A WEEK  
YES, 1-3 TIMES A MONTH  
YES, BUT LESS OFTEN  
NO, NEVER

Country: Slovakia  
Survey: European Health Interview Survey  
Survey Code: SK 04  
Year: 2007  
Type: Face to Face

---

Question PE.1

Now I will ask you questions about the time you actively spent carrying out physical activities in the last 7 days. Please answer each question, even when you do not consider yourself to be a physically active wo/man. Think of the activities carried out at work, activities that are part of your housework or work in the garden, the activities undertaken in free time, your sporting activities and how you transport yourself from place to place. Remember all your energy-intensive activities, in other words, when you had to invest a considerable physical effort and that you performed during the last 7 days. During the intensive physical activity (done at an accelerated pace) you breathe faster, than normal. These activities may include, for example, lifting heavy loads, spading, aerobics or fast cycling. Consider only those activities that you have performed continuously at least 10 minutes.

How many days have you performed intense physical activity during the last 7 days?

... Number of days per week  
I do not know  
Refused to answer

INTERVIEWER CLARIFIES: THINK ONLY OF PHYSICAL ACTIVITY YOU HAVE BEEN DOING CONTINUOUSLY FOR AT LEAST 10 MINUTES.

---

Question PE.2

How much time did you spend carrying out vigorous physical activity during the last 7 days? „ESTIMATION IS ACCEPTABLE“.

... hours ... minutes  
I do not know  
Refused to answer

---

Question PE.3

And now try to think back all your activities, which needed to be done with only mild physical effort, and you have done them over the last 7 days. We mean activities undertaken with only modest effort or slow tempo cause that you breathe just a little faster than normal and may include carrying light loads such as cycling in recreational tempo. Do not take into account walking but consider only those activities that were carried out continuously for at least 10 minutes.

How many days have you performed moderately intense physical activity during the last 7 days?

- ... Number of days per week
  - I do not know
  - Refused to answer
- 

Question PE.4

How much time have you spent by performing moderately intense physical activity during the last 7 days? „ ESTIMATION IS ACCEPTABLE “.

- ... hours ... minutes
  - I do not know
  - Refused to answer
- 

Question PE.5

And now try to think back the time you spent walking. Consider walking at work, walking in the house (apartment) and walking when you needed to get somewhere or any other walk, you carried out only as a recreational sport, exercise or relaxation.

How many days did you take a walk, which lasted continuously for at least 10 minutes during the last 7 days?

- ... Number of days per week
  - I do not know
  - Refused to answer
- 

Question PE.6

INTERVIEWER CLARIFIES: THINK ONLY OF SUCH A WALK YOU HAVE BEEN DOING CONTINUOUSLY FOR AT LEAST 10 MINUTES.

How much time did you spend walking in the last 7 days? „ ESTIMATION IS ACCEPTABLE “.

- ... hours ... minutes
- I do not know
- Refused to answer

Country: United Kingdom  
Survey: Health Survey for England  
Survey Code: UK 35  
Year: 2007  
Type: Face to Face + self administered

---

Question Wlk5Ch

Now I'd like to ask you about some of the things you have/(name of child) has done in the last week. By last week I mean last (day one week ago) up to yesterday. In the last week, have you/has s/he done a continuous walk that lasted at least 5 minutes not counting things done as part of school lessons?

Yes  
No

---

Question DaysWlk

On how many days in the last week did you/(name of child) do a continuous walk that lasted at least 5 minutes not counting things done as part of school lessons?

One day  
Two days  
Three days  
Four days  
Five days  
Six days  
Every day

---

Question DayWlkT

On each day that you/(name of child) did a walk like this for at least 5 minutes, how long did you/s/he spend walking altogether?

What we want recorded is the average time spent walking per weekday. If the respondent walked for over 5 minutes on more than one day in the last week, take an average of the time spent per day

5 minutes, less than 15 minutes  
15 minutes, less than 30 minutes  
30 minutes, less than 1 hour  
1 hour, less than 1 1/2 hours  
1 1/2 hours, less than 2 hours  
2 hours, less than 2 1/2 hours  
2 1/2 hours, less than 3 hours  
3 hours, less than 3 1/2 hours  
3 1/2 hours, less than 4 hours  
4 hours or more (please specify how long)

---

Question WlkHrs

How long did you/(name of child) spend walking on each day?  
RECORD HOURS SPENT BELOW

...

RECORD HERE MINUTES SPENT WALKING.

...

---

Question ChPace

Which of the following describes your usual walking pace ...

- ... a slow pace,
  - ... a steady average pace,
  - ... a fairly brisk pace,
  - ... or, a fast pace - at least 4 mph?
  - ... None of these
- 

Question Q41

How many days a week do you think people of your age should do physical activity? Include all moderate physical activity, including physical activity as part of a job. By week we mean the whole week including weekends.

Please write in NUMBER ... Days  
OR TICK I don't know

---

Question Q42

On each of the days someone of your age does moderate physical activity, how many minutes a day should they do it for it to be good for their health?

Please write in NUMBER ... Minutes per day  
OR TICK I don't know

---

Question Q43

Here are some statements about physical activity and exercise.  
Please indicate how strongly you agree or disagree with the statements.

- a) You can get enough physical activity in your daily life without doing sport or exercise such as jogging or going to the gym
- b) Physical activity is good for your health even if it is only for 10 minutes at a time
- c) Physical activity is good for your health even if it is moderate, such as walking briskly, gardening (for example digging) and housework (for example vacuuming)
- d) Physical activity is better for your health if you keep it up for at least 30 minutes at a time

e) Physical activity is better for your health if it gets you out of breath

- Strongly agree
  - Agree
  - Neither agree or disagree
  - Disagree
  - Strongly disagree
  - Can't choose
- 

#### Question Q44

There are many reasons for taking part in physical activity, exercise or sport. Which, if any, on the following list apply to you?

Tick ALL that apply

I don't participate in any physical activity: Go to Q 4 5

- To release tension or relax
  - To be out of doors
  - To maintain good health
  - To socialise with other people
  - To lose or control weight
  - I have a physically demanding job
  - To have fun or adventure or excitement
  - To get or feel fit
  - To gain a sense of achievement
  - To enjoy the competition
  - To work harder or concentrate better
  - I have to walk or cycle to get around
  - Something else
- 

#### Question Q45

Compared to other people of your own age would you describe yourself as...

Tick one box

- Very physically active
  - Fairly physically active
  - Not very physically active
  - Not at all physically active -> Go to Q48
- 

#### Question Q46

Which of the following activities do you think contribute most to keeping you fit?

- Walking or cycling to get around
- Climbing stairs instead of taking a lift or escalator
- Keeping active at home with housework, gardening or childcare
- Having a physically active job
- Going for walks or going hiking
- Going out for cycle rides or going mountain biking

Going to the gym  
Going jogging, running or swimming  
Playing golf  
Taking part in sport  
Doing keep fit, exercise or dance  
Something else

---

Question Q47

Do you think you do enough physical activity, exercise, or sport to keep you as fit as you would like?

Yes  
No

---

Question Q48

Would you like to do more exercise or physical activity than you do at the moment?

Yes  
No -> Go to Q51  
At the moment I am unable to

---

Question Q49

Which of the following statements best describes you?  
Tick one box

I'm unlikely ever to do more physical activity, exercise or sport -> Go to Q51  
I expect to do more physical activity, exercise or sport in the next year  
I expect to do more physical activity, exercise or sport but not in the next year  
I don't know

---

Question Q50

Which types of physical activity, exercise or sport do you expect to take more of in the future?  
Tick all that apply

Walking or cycling to get around  
Climbing stairs instead of taking a lift or escalator  
Keeping active at home with housework, gardening or childcare  
Having a physically active job  
Going for walks or going hiking  
Going out for cycle rides or going mountain biking  
Going to the gym  
Going jogging, running or swimming  
Playing golf  
Taking part in sport  
Doing keep fit, exercise or dance  
Something else

---

### Question Q51

What stops you from doing more physical activity, exercise or sport than you do now?  
Tick ALL that apply

- I don't need to do more -> Go to the end
  - My work commitments
  - I don't have enough leisure time
  - Caring for children or older people
  - I have no one to exercise with
  - I don't have enough money
  - There are no suitable places to do it in my area
  - I haven't got the right clothes or equipment
  - Poor health or physical limitations
  - I have injuries which prevent me
  - None of these
- 

### Question Q52

Many other factors can prevent people from doing more physical activity, exercise or sport.  
From the following list which, if any, apply to you?  
Tick ALL that apply

- I'm not the sporty type
  - I'm too shy or embarrassed
  - I'm worried about injury
  - I'm too old
  - I prefer to do other things
  - I think exercise is a waste of time
  - I'm too overweight
  - I am not motivated to do more
  - I don't enjoy physical activity
  - Something else
  - None of these
  - Don't know
- 

### Question Q53

What would encourage you to do more physical activity, exercise or sport?  
Tick ALL that apply

- I don't need to do more
- Advice from a doctor or a nurse
- Advice from a family member
- My own ill health
- Family member's ill health
- Increased income
- More leisure time
- Self-motivation
- Having someone to do it with
- Having a physical activity
- I am capable of
- Clearer advice from the government
- Something else
- None of these



Country: Belgium  
Survey: Health Interview Survey  
Survey Code: BE 06  
Year: 2008  
Type: Self administered

---

Question PE01-PA01

Think of the physical activities you engage in at work, in the house or garden, and physical activities in connection with getting from place to place and during your free time, such as leisure activities, exercise sessions and sport.

Intense physical activities

Intense physical activities are those that require a major physical effort and cause you to breathe much more quickly and deeply than usually.

In the past 7 days, on how many days did you engage in intense physical activities such as lifting heavy objects, digging, aerobics, jogging or football?

... days a week

---

Question PA02

On one of these days, for how long did you engage in this kind of intense physical activity?

... hours a day  
... minutes a day  
I don't know

---

Question PE03-PA03

Moderate physical activity

When we speak of moderate physical activity we are thinking of activities that require a moderate physical effort and that make you breathe slightly more quickly than usually.

In the past 7 days, on how many days did you engage in moderate physical activity such as lifting not too heavy objects, cycling at a moderate rate, playing doubles tennis, swimming, ...?

!!! Do not include walking!!!

... days a week

---

Question PA04

On one of these days, for how long did you engage in this kind of moderate physical activity?

- ... hours a day
  - ... minutes a day
  - I don't know
- 

Question PE05-PA05

Walking

Think now of the time you spent walking, whether to home or back home, walking from one place to another, and any other kind of walking you may have one for relaxation, sport, exercise or leisure.

During the past 7 days, on how many days did you walk for more than 10 minutes continuously?

- ... days a week
- 

Question PA06

On one of these days, for how long in total did you walk?

- ... hours a day
  - ... minutes a day
  - I don't know
- 

Question PA07

In general, how fast did you walk? You walked ...

- Quickly, causing you to breathe much more quickly than usually
- At a moderate pace, causing you to breathe a little more quickly than usually
- Slowly, which did not cause you to change your breathing
- I don't know

Country: Bulgaria  
Survey: EHIS 2008  
Survey Code: BG 04  
Year: 2008  
Type: Face to Face

---

#### Question PE.1

I would like to ask you about the time you have spent being physically active in the last seven days. Please answer each question even if you don't think you are a physically active person. Think about activities you do at work; as part of your housework and gardening; moving from place to place; in your spare time for leisure, exercise or sport.

Please think about the vigorous activities you did during the last 7 days. Vigorous physical activities take hard physical effort and make you breathe much harder than normal. They may include things like heavy lifting, digging, aerobics or fast cycling. Please think about only those activities you did for at least 10 minutes at a time.

During the last seven days, on how many days did you do any vigorous physical activities? Do not include walking.

... days per week  
Don't know  
Refusal

---

#### Question PE.2

About how much time, in total, did you spend over the last seven days doing vigorous physical activity? An estimate is acceptable

... hours ... min  
Don't know  
Refusal

---

#### Question PE.3

I'd like you to think about activities requiring moderate physical effort. Moderate physical activities make you breathe somewhat harder than normal and may include light loads such as cycling at a regular pace, or playing doubles tennis. Do not include walking. Please think about only those physical activities that you did for at least 10 minutes at a time.

During the last 7 days, on how many days did you do any moderate physical activities? Do not include walking.

... days per week  
Don't know  
Refusal

---

Question PE.4

About how much time, in total, did you spend over those seven days doing moderate physical activity? An estimate is acceptable

... hours ... min  
Don't know  
Refusal

---

Question PE.5

Think about the time you spent walking in the last 7 days, for at least 10 minutes at a time. This includes walking while at work or at home; walking from place to place; and any other walking that you might do solely for leisure, sport, exercise or in your spare time.

During the last 7 days, on how many days did you walk for at least 10 minutes at a time?

... days per week  
Don't know  
Refusal

---

Question PE.6

About how much time did you spend walking over the last 7 days?  
An estimate is acceptable

... hours ... min  
Don't know  
Refusal

Country: Cyprus  
Survey: EHIS 2008  
Survey Code: CY 03  
Year: 2008  
Type: Face to Face

---

#### Question PE.1

Questions PE.1-PE.6, are about the time you spend for sport/physical activities in the past 7 days. Please answer every question even if you do not consider your self an active person.

Please include all kind of activities, such as housework and gardening, as well as activities you do at work or as an exercise or sport.

Intensive activities need great physical effort and harder breathing than normal. They include heavy lifting, construction works, agricultural works, aerobics, fast bicycling etc.

Please think only those activities that you did for at least 10 minutes during the past 7 days.

During the past 7 days, how many days did you do intensive activities for at least 10 minutes per time?

No of days: ...  
Do not know/not sure/do not remember  
I refuse to answer

---

#### Question PE.2

During the past 7 days, how much time did you spend in total doing intensive physical activities?

Interviewer, inform the interviewee that an estimate is acceptable only if necessary

Hours/Minutes ... : ...  
Do not know/not sure/do not remember  
I refuse to answer

---

#### Question PE.3

Moderate activities need harder breathing than normal. They include moderate lifting, tennis (double game), normal speed cycling etc. Walking is not included.

Please think only those activities that you did for at least 10 minutes during the past 7 days.

During the past 7 days, how many days did you do moderate activities for at least 10 minutes per time?

No of days ...  
Do not know/not sure/do not remember  
I refuse to answer

---

Question PE.4

During the past 7 days, how much time did you spend in total doing moderate physical activities? Interviewer, inform the interviewee that an estimate is acceptable only if necessary.

Hours/Minutes ... : ...  
Do not know/not sure/do not remember  
I refuse to answer

---

Question PE.6

During the past 7 days, how much time did you spend walking? Interviewer, inform the interviewee that an estimate is acceptable only if necessary.

Hours/Minutes ... : ...  
Do not know/not sure/do not remember  
I refuse to answer

Country: Czech Republic  
Survey: EHIS CR 2008  
Survey Code: CZ 04  
Year: 2008  
Type: Face to Face

---

#### Question PE.1

Now I would like to ask you about time that you spent doing physical activity in the last seven days. Please answer all questions, even if you do not consider yourself physically active person. Consider all your activities that you do at work, at home or in the garden, moving from place to place, free time activities or sports activities.

Consider all intense, physically demanding physical activities that require hard physical straining you have done within the last 7 days. Hard physical activity markedly increases frequency of breathing compared to normal. It may include, for instance, lifting heavy weights, excavation work, aerobic or fast bicycle ride. Please, consider only those physical activities that you were performing for at least 10 minutes at a time.

In how many days within the last 7 days did you perform any hard physical activity?

... days a week  
does not know  
refused

---

#### Question PE.2

Instruction for the interviewer: Read: "Consider only those activities that the respondent performed for at least 10 minutes at a time."

Please, can you state how much time have you spent in these days doing hard physical activity?

If necessary, you may tell the respondent: "An estimate is acceptable."

... hours ... minutes  
does not know  
refused

---

#### Question PE.3

Consider all medium-intensity physical activities that you have been doing within the last 7 days. Medium-intensity physical activities increases breathing frequency compared to normal and may include carrying light weight loads, riding a bike at regular pace or playing doubles in tennis. Do not include walking. Please consider only those physical activities that you were performing for at least 10

minutes at a time.

In how many days within the last 7 days did you perform any medium-intensity physical activities?

... days a week  
does not know  
refused

---

#### Question PE.4

Instruction for the interviewer: Read: "Consider only those activities that you performed for at least 10 minutes at a time."

Please, can you state how much time have you spent in these days doing medium-intensity physical activities?

If necessary, you may tell the respondent: "An estimate is acceptable."

... hours ... minutes  
does not know  
refused

---

#### Question PE.5

Now, consider all the time spent by walking in the last 7 days. This means walking at work or at home, walking while moving from place to place and any other walking that you do during recreation, sports, tourism or walks in your free time.

In how many days (within the last 7 days) did you spent at least 10 minutes at a time walking?

... days a week  
does not know  
refused

---

#### Question PE.6

Instruction for the interviewer: Read: "Consider only walking you performed for at least 10 minutes at a time."

Please, could you state how much time did you spend in these days walking?

If necessary, you may tell the respondent: "An estimate is acceptable."

... hours ... minutes  
does not know  
refused



Country: Latvia  
Survey: EHIS 2008  
Survey Code: LV 06  
Year: 2008  
Type: Face to Face

---

Question FS\_01

Now, I will ask you questions concerning the time you have spent on physical activities over the last 7 days.

Recall the intensive physical activities you have had over the last 7 days (heavy physical effort, picking up heavy things, digging, aerobics etc.). Please take into account only those intensive physical activities that were continuous for at least 10 minutes.

Questions on physical activities

How often (how many days) have you had any intensive physical activities over the last 7 days?

- ... days per week
  - None
  - I do not know
  - Refuses to respond
- 

Question FS\_02

How much time have you spent on intensive physical activities over the last 7 days?

- ... hours ... minutes
  - I do not know
  - Refuses to respond
- 

Question FS\_03

Now, think of moderate physical activities (e.g. carrying light weights, cycling and other activities requiring moderate physical effort). Please take into account only those activities that were continuous for at least 10 minutes.

How often (how many days) did you have any moderate physical activities over the last 7 days?

- ... days per week
- None
- I do not know
- Refuses to respond

---

Question FS\_04

During the past 7 days, how much time did you spend in total doing moderate physical activities? Interviewer, inform the interviewee that an estimate is acceptable only if necessary.

Hours/Minutes ... : ...

Do not know/not sure/do not remember

I refuse to answer

---

Question FS\_05

Now, think of the time you have spent on walking over the last 7 days. This includes moving from one place to another at work or at home, and any kind of walk performed for the purposes of training, resting or sports. Please take into account only those activities that were continuous for at least 10 minutes.

How often (how many days) have you walked for at least 10 continuous minutes over the last 7 days?

... days per week

None

I do not know

Refuses to respond

---

Question FS\_06

How much time have you spent on walking over the last 7 days?

... hours ... minutes

I do not know

Refuses to respond

Country: Malta  
Survey: EHIS 2008  
Survey Code: MT 02  
Year: 2008  
Type: Face to Face

---

Question PE.1

Now I'd like to ask you about the time spent doing physical activity in these last 7 days.

Kindly answer each question even if you don't think you're that active. Think about the activity you do at work, as part of housework or hobby, to get from one place to another, and during your free recreational time, exercise or sport.

Think about the most intense activities, which require a great physical effort, which you've done in these last 7 days. Intense activities require you to take more deep breaths, and they can include carrying heavy weight, digging, aerobics, or riding a bike with a certain velocity. Think only of those physical activities on which you spent at least 10 minutes every time while doing them.

In these last 7 days, how many days did you do very intense physical activities?

- ... Days in a week
  - Don't know
  - I'd rather not tell you
- 

Question PE.2

THINK ONLY OF THOSE PHYSICAL ACTIVITIES ON WHICH YOU SPEND AT LEAST 10 MINUTES EVERY TIME WHILE DOING THEM.

In these last 7 days, how much time in all did you spend in very intense physical activities?

- ... hours ... minutes
  - Don't know
  - I'd rather not tell you
- 

Question PE.3

Now think about the activities of moderate intensity which you have done in these last 7 days.

Physical activities of moderate intensity enable you to take deeper breaths than usual, and they can include carrying light weight, riding a bike with a normal velocity, or tennis in doubles. Don't include walking. Just like before, only think

about those physical activities on which you spend at least 10 minutes every time.

In these last 7 days, how many days did you spend on physical activities of moderate intensity?

- ... Days a week
  - Don't know
  - I'd rather not tell you
- 

#### Question PE.4

THINK ONLY OF THOSE PHYSICAL ACTIVITIES ON WHICH YOU SPEND AT LEAST 10 MINUTES EVERY TIME WHILE DOING THEM.

In these last 7 days, how many days did you spend doing physical activities of moderate intensity?

- ... hours ... minutes
  - Don't know
  - I'd rather not tell you
- 

#### Question PE.5

Now think of the time you've spent walking in these last 7 days.

This includes walking either from work or from home, walking from one place to another, or any other type of walking that you do for your recreation, sport and exercise or in your free time.

In these last 7 days, how many days did you walk at least 10 minutes every time?

- ... Days in a week
- Don't know
- I'd rather not tell you

Country: Romania  
Survey: Health Interview Survey  
Survey Code: RO 02  
Year: 2008  
Type: Face to Face + self administered

---

Question 114

Physical activity

Now I would like to ask you about the time you spent on physical activity during the last 7 days. Please answer each question even if you do not see yourself as an active person.

Think of any physical activity, such as: housekeeping or gardening, activities at work, physical exercises, walks or sports.

I will ask separate questions about intense activities, moderate activities and walking. Let us talk first about intense physical activities.

Intense physical activities involve high physical effort and heavier breathing than usual. They can include activities such as: lifting heavy objects, digging, wood cutting, working in constructions, going up the stairs for work, gymnastics or bicycle riding at high speed.

Think only of those physical activities that you performed for at least 10 minutes.

During the last 7 days, on how many days did you have intense physical activities?

total days with vigorous physical activities: ... days week

I don't know/I'm not sure

Refusal

---

Question 115

On the overall, during these last 7 days, how much time did you spend on intense physical activities?

total time of intense physical activities/week:

... hours ... minutes/week

I don't know/I'm not sure

Refusal

---

Question 116

Now I would like to ask you about the time you spend on moderate physical activities.

A moderate physical activity is an activity that involves moderate physical effort and that makes you breathe a bit heavier than usual and may include activities such as: lifting of light weights, sweeping the floor, washing windows, riding a

bicycle (at moderate speed), tennis or swimming. Do not include strolls.  
Now think of only those moderate physical activities that you performed for at least 10 minutes.

During the last 7 days, on how many days did you have moderate physical activities?

total days with moderate physical activities: ... days/week  
I don't know/I'm not sure  
Refusal

---

#### Question 117

On the overall, during these last 7 days, how much time did you spend on moderate physical activities?

total time of moderate physical activities/week:  
... hours ... minutes/week  
I don't know/I'm not sure  
Refusal

---

#### Question 118

Let us talk about the time spent on walking or strolling.  
Strolling is a separate activity and includes walking to or from work/school, walking from one place to another or any other strolls you take as physical exercises, sports or only for recreation.  
Now think only of those strolls you took for at least 10 minutes.

During the last 7 days, on how many days did you have strolls or walks, for at least 10 minutes?

total days with strolls: ... days/week  
I don't know/I'm not sure  
Refusal

---

#### Question 119

On the overall, during these last 7 days, how much time did you spend on walking or strolling?

total strolling time/day: ... hours ... minutes/day  
I don't know/I'm not sure  
Refusal

Country: Turkey  
Survey: Health Interview Survey 2008  
Survey Code: TR 06  
Year: 2008  
Type: Face to Face

---

Question PE.1

How many times did you do vigorous bodily activity in the past 7 days?

In one week ... day(s)  
Never  
I do not know  
I do not wish to respond

---

Question PE.2

How much time did you spend on vigorous bodily activity in the past 7 days?

... hours ... minutes  
I do not know  
I do not wish to respond

---

Question PE.3

Think about activities requiring moderate physical force in the past 7 days. In moderate activities, a person breathes slightly harder than normal, and such activities include carrying a light weight, riding a bicycle at normal speed or playing a tennis match. Do not include walking in this group. Think about when you do these physical activities for at least 10 minutes on just one occasion.

How many times did you do moderate bodily activity in the past 7 days?

In one week: ... day(s)  
Never  
I do not know  
I do not wish to respond

---

Question PE.4

How much time did you spend on moderate physical force in the past 7 days?

hours ... minutes ...  
I do not know  
I do not wish to respond

---

Question PE.5

How many times did you do vigorous bodily activity in the past 7 days?

In one week ... day(s)

Never

I do not know

I do not wish to respond

---

Question PE.6

How much time did you spend walking in the past 7 days?

... hours ... minutes

I do not know

I do not wish to respond



Country: United Kingdom  
Survey: Health Survey for England  
Survey Code: UK 36  
Year: 2008  
Type: Face to Face

---

Question Wlk5Ch

Now I'd like to ask you about some of the things you have/(name of child) has done in the last week. By last week I mean last (day one week ago) up to yesterday. In the last week, have you/has s/he done a continuous walk that lasted at least 5 minutes not counting things done as part of school lessons?

Yes  
No

---

Question DaysWlk

On how many days in the last week did you/(name of child) do a continuous walk that lasted at least 5 minutes not counting things done as part of school lessons?

One day  
Two days  
Three days  
Four days  
Five days  
Six days  
Every day

---

Question DayWlkT

On each day that you/(name of child) did a walk like this for at least 5 minutes, how long did you/s/he spend walking altogether?

What we want recorded is the average time spent walking per weekday. If the respondent walked for over 5 minutes on more than one day in the last week, take an average of the time spent per day

5 minutes, less than 15 minutes  
15 minutes, less than 30 minutes  
30 minutes, less than 1 hour  
1 hour, less than 1 1/2 hours  
1 1/2 hours, less than 2 hours  
2 hours, less than 2 1/2 hours  
2 1/2 hours, less than 3 hours  
3 hours, less than 3 1/2 hours  
3 1/2 hours, less than 4 hours  
4 hours or more (please specify how long)

---

Question WlkHrs

How long did you/(name of child) spend walking on each day?  
RECORD HOURS SPENT BELOW

...

RECORD HERE MINUTES SPENT WALKING.

...

---

Question ChPace

Which of the following describes your usual walking pace ...

- ... a slow pace,
- ... a steady average pace,
- ... a fairly brisk pace,
- ... or, a fast pace - at least 4 mph?
- ... None of these
