# Supplementary material for: Development of the European Health Interview Survey - Physical Activity Questionnaire (EHIS-PAQ) to monitor physical activity in the European Union
Source: PubMed Central journal article supplement (PMC4667448; doi:10.1186/s13690-015-0110-z), 2015-12-02
Supplement: 13690_2015_110_MOESM2_ESM.pdf [file 13690_2015_110_MOESM2_ESM.pdf]

## Supplemental File 2

**Table 1. Proportion of respondents work-related physical activity according to selected characteristics, workforce population – pooled analysis Belgium, Germany, Estonia , ImpEHIS II 2011**

| Characteristic             | No. in sample | Mostly sitting or standing |    | Mostly walking or tasks of light to moderate physical effort |    | Mostly heavy labour or physically demanding work |    |
|----------------------------|---------------|----------------------------|----|--------------------------------------------------------------|----|--------------------------------------------------|----|
|                            |               | %                          | N  | %                                                            | N  | %                                                | N  |
| <b>Total</b>               | 97            | 59.8                       | 58 | 26.8                                                         | 26 | 13.4                                             | 13 |
| <b>Age group (yrs)</b>     |               |                            |    |                                                              |    |                                                  |    |
| 15-29                      | 10            | 30.0                       | 3  | 30.0                                                         | 3  | 40.0                                             | 4  |
| 30-39                      | 24            | 66.7                       | 16 | 29.2                                                         | 7  | 4.2                                              | 1  |
| 40-49                      | 28            | 60.7                       | 17 | 32.1                                                         | 9  | 7.1                                              | 2  |
| 50-59                      | 25            | 60.0                       | 15 | 20.0                                                         | 5  | 20.0                                             | 5  |
| ≥60                        | 10            | 70.0                       | 7  | 20.0                                                         | 2  | 10.0                                             | 1  |
| <b>Sex</b>                 |               |                            |    |                                                              |    |                                                  |    |
| Men                        | 52            | 59.6                       | 31 | 19.2                                                         | 10 | 21.2                                             | 11 |
| Women                      | 45            | 60.0                       | 27 | 35.6                                                         | 16 | 4.4                                              | 2  |
| <b>Education</b>           |               |                            |    |                                                              |    |                                                  |    |
| Primary / lower secondary  | 5             | 40.0                       | 2  | 20.0                                                         | 1  | 40.0                                             | 2  |
| Upper secondary            | 35            | 37.1                       | 13 | 37.1                                                         | 13 | 25.7                                             | 9  |
| Post secondary or tertiary | 57            | 75.4                       | 43 | 21.1                                                         | 12 | 3.5                                              | 2  |
| <b>Marital status</b>      |               |                            |    |                                                              |    |                                                  |    |
| Married                    | 57            | 57.9                       | 33 | 33.3                                                         | 19 | 8.8                                              | 5  |
| Previously married         | 14            | 71.4                       | 10 | 14.3                                                         | 2  | 14.3                                             | 2  |
| Never married              | 26            | 57.7                       | 15 | 19.2                                                         | 5  | 23.1                                             | 6  |
| <b>Perceived Health</b>    |               |                            |    |                                                              |    |                                                  |    |
| (Very) good                | 73            | 65.8                       | 48 | 21.9                                                         | 16 | 12.3                                             | 9  |
| (Very) poor to fair        | 23            | 39.1                       | 9  | 43.5                                                         | 10 | 17.4                                             | 4  |
| <b>Country</b>             |               |                            |    |                                                              |    |                                                  |    |
| Belgium                    | 24            | 75.0                       | 18 | 12.5                                                         | 3  | 12.5                                             | 3  |
| Germany (PAPI)             | 29            | 72.4                       | 21 | 27.6                                                         | 8  | 0                                                | 0  |
| Germany (CATI)             | 19            | 52.6                       | 10 | 26.3                                                         | 5  | 21.5                                             | 4  |
| Estonia                    | 25            | 36.0                       | 9  | 40.0                                                         | 10 | 24.0                                             | 6  |

**Table 2. Means of transport-related walking, bicycling and overall active transportation according to selected characteristics – pooled analysis Belgium, Germany, Estonia**

| Characteristic             | Walking minutes per week |     | Bicycling minutes per week |     | Active transportation MET* minutes per week |     |
|----------------------------|--------------------------|-----|----------------------------|-----|---------------------------------------------|-----|
|                            | m                        | N   | m                          | N   | m                                           | N   |
| <b>Total</b>               | 251.8                    | 164 | 51.8                       | 167 | 1145.0                                      | 164 |
| <b>Age group (yrs)</b>     |                          |     |                            |     |                                             |     |
| 15-29                      | 342.0                    | 33  | 49.4                       | 33  | 1424.9                                      | 33  |
| 30-39                      | 221.5                    | 30  | 60.9                       | 33  | 1120.0                                      | 30  |
| 40-49                      | 245.9                    | 35  | 82.9                       | 35  | 1308.5                                      | 35  |
| 50-59                      | 150.6                    | 35  | 26.9                       | 35  | 658.0                                       | 35  |
| ≥60                        | 306.1                    | 31  | 37.7                       | 31  | 1236.7                                      | 31  |
| <b>Sex</b>                 |                          |     |                            |     |                                             |     |
| Men                        | 255.1                    | 82  | 59.9                       | 83  | 1205.4                                      | 82  |
| Women                      | 248.5                    | 82  | 43.8                       | 84  | 1084.7                                      | 82  |
| <b>Education</b>           |                          |     |                            |     |                                             |     |
| Primary / Lower secondary  | 261.9                    | 21  | 1.0                        | 21  | 870.0                                       | 21  |
| Upper secondary            | 312.0                    | 55  | 51.7                       | 57  | 1343.8                                      | 55  |
| Post secondary or tertiary | 211.8                    | 88  | 63.9                       | 89  | 1086.4                                      | 88  |
| <b>Marital status</b>      |                          |     |                            |     |                                             |     |
| Married                    | 210.6                    | 84  | 49.6                       | 86  | 996.4                                       | 84  |
| Previously married         | 250.2                    | 21  | 12.7                       | 22  | 900.1                                       | 21  |
| Never married              | 311.0                    | 59  | 69.6                       | 59  | 1443.8                                      | 59  |
| <b>Employment status</b>   |                          |     |                            |     |                                             |     |
| Employed                   | 214.1                    | 100 | 51.4                       | 102 | 1019.6                                      | 100 |
| Student, trainee           | 330.3                    | 19  | 79.2                       | 19  | 1565.1                                      | 19  |
| Retired                    | 228.5                    | 26  | 38.8                       | 26  | 987.0                                       | 26  |
| Others                     | 418.6                    | 18  | 35.3                       | 19  | 1589.8                                      | 18  |
| <b>Perceived Health</b>    |                          |     |                            |     |                                             |     |
| (Very) good                | 257.3                    | 119 | 56.9                       | 122 | 1195.8                                      | 119 |
| (Very) poor to fair        | 235.5                    | 44  | 38.9                       | 44  | 1010.2                                      | 44  |
| <b>Country</b>             |                          |     |                            |     |                                             |     |
| Belgium                    | 204.7                    | 48  | 27.9                       | 50  | 847.3                                       | 48  |
| Germany (PAPI)             | 259.2                    | 42  | 97.6                       | 42  | 1441.0                                      | 42  |
| Germany (CATI)             | 258.6                    | 40  | 43.0                       | 40  | 1111.5                                      | 40  |
| Estonia                    | 301.2                    | 34  | 41.0                       | 35  | 1239.2                                      | 34  |

\* Overall active transportation, assessed on the basis of self-reported walking and bicycling for transportation, in metabolic equivalents (MET) kcal/kg, 1 MET = persons caloric consumption at complete rest.

**Table 3. Means of leisure-time, health-enhancing and muscle-strengthening physical activity according to selected characteristics – pooled analysis Belgium, Germany, Estonia**

| Characteristic             | Sports, fitness and recreational (leisure) PA minutes per week |     | HEPA (leisure PA + cycling) minutes per week |     | Muscle-strengthening activity in times per week |     |
|----------------------------|----------------------------------------------------------------|-----|----------------------------------------------|-----|-------------------------------------------------|-----|
|                            | m                                                              | N   | m                                            | N   | m                                               | N   |
| <b>Total</b>               | 156.1                                                          | 166 | 208.5                                        | 165 | 0.7                                             | 165 |
| <b>Age group (yrs)</b>     |                                                                |     |                                              |     |                                                 |     |
| 15-29                      | 217.2                                                          | 32  | 268.1                                        | 32  | 1.2                                             | 32  |
| 30-39                      | 138.6                                                          | 32  | 201.4                                        | 32  | 0.5                                             | 33  |
| 40-49                      | 157.7                                                          | 35  | 240.6                                        | 35  | 0.7                                             | 35  |
| 50-59                      | 119.0                                                          | 35  | 145.9                                        | 35  | 0.6                                             | 35  |
| ≥60                        | 151.0                                                          | 31  | 188.7                                        | 31  | 0.4                                             | 31  |
| <b>Sex</b>                 |                                                                |     |                                              |     |                                                 |     |
| Men                        | 180.8                                                          | 83  | 240.7                                        | 83  | 0.7                                             | 83  |
| Women                      | 131.0                                                          | 82  | 175.9                                        | 82  | 0.7                                             | 83  |
| <b>Education</b>           |                                                                |     |                                              |     |                                                 |     |
| Primary / Lower secondary  | 135.5                                                          | 20  | 136.5                                        | 20  | 0.5                                             | 20  |
| Upper secondary            | 132.4                                                          | 57  | 184.0                                        | 57  | 0.6                                             | 57  |
| Post-secondary or tertiary | 176.1                                                          | 88  | 240.7                                        | 88  | 0.8                                             | 89  |
| <b>Marital status</b>      |                                                                |     |                                              |     |                                                 |     |
| Married                    | 131.4                                                          | 85  | 181.6                                        | 85  | 0.4                                             | 86  |
| Previously married         | 137.7                                                          | 22  | 150.5                                        | 22  | 0.3                                             | 22  |
| Never married              | 199.1                                                          | 58  | 269.9                                        | 58  | 1.2                                             | 58  |
| <b>Employment status</b>   |                                                                |     |                                              |     |                                                 |     |
| Employed                   | 147.9                                                          | 102 | 199.3                                        | 102 | 0.7                                             | 102 |
| Student, trainee           | 240.0                                                          | 18  | 323.6                                        | 18  | 0.9                                             | 18  |
| Retired                    | 161.2                                                          | 25  | 201.6                                        | 25  | 0.4                                             | 26  |
| Others                     | 121.8                                                          | 19  | 157.1                                        | 19  | 0.6                                             | 19  |
| <b>Perceived health</b>    |                                                                |     |                                              |     |                                                 |     |
| (Very) good                | 174.0                                                          | 121 | 231.4                                        | 121 | 0.7                                             | 121 |
| (Very) poor to fair        | 109.1                                                          | 43  | 148.8                                        | 43  | 0.8                                             | 44  |
| <b>Country</b>             |                                                                |     |                                              |     |                                                 |     |
| Belgium                    | 104.4                                                          | 50  | 132.3                                        | 50  | 0.2                                             | 50  |
| Germany (PAPI)             | 188.2                                                          | 42  | 285.8                                        | 42  | 1.1                                             | 42  |
| Germany (CATI)             | 207.7                                                          | 39  | 251.8                                        | 39  | 1.2                                             | 40  |
| Estonia                    | 133.1                                                          | 34  | 175.3                                        | 34  | 0.3                                             | 34  |

**Table 4. Proportion of respondents meeting the health-enhancing physical activity (HEPA) guidelines, by type of physical activity and selected characteristics – pooled analysis Belgium, Germany, Estonia**

| Characteristic             | Aerobic PA compliance (HEPA $\geq$ 150 min/week) |     | Muscle-strengthening PA compliance (MSPA $\geq$ 2 times/week) |     | Overall PA recommendation compliance (meeting both guidelines, HEPA and MSPA) |     |
|----------------------------|--------------------------------------------------|-----|---------------------------------------------------------------|-----|-------------------------------------------------------------------------------|-----|
|                            | %                                                | N   | %                                                             | N   | %                                                                             | N   |
| <b>Total</b>               | 48.5                                             | 165 | 19.4                                                          | 165 | 16.4                                                                          | 165 |
| <b>Age group (yrs)</b>     |                                                  |     |                                                               |     |                                                                               |     |
| 15-29                      | 53.1                                             | 17  | 37.5                                                          | 12  | 31.3                                                                          | 10  |
| 30-39                      | 53.1                                             | 17  | 15.6                                                          | 5   | 15.6                                                                          | 5   |
| 40-49                      | 48.6                                             | 17  | 14.3                                                          | 5   | 14.3                                                                          | 5   |
| 50-59                      | 48.6                                             | 17  | 17.1                                                          | 6   | 14.3                                                                          | 5   |
| $\geq$ 60                  | 38.7                                             | 12  | 12.9                                                          | 4   | 6.5                                                                           | 2   |
| <b>Sex</b>                 |                                                  |     |                                                               |     |                                                                               |     |
| Men                        | 54.2                                             | 45  | 18.1                                                          | 15  | 18.1                                                                          | 15  |
| Women                      | 42.7                                             | 35  | 20.7                                                          | 17  | 14.6                                                                          | 12  |
| <b>Education</b>           |                                                  |     |                                                               |     |                                                                               |     |
| Primary / Lower secondary  | 25.0                                             | 5   | 15.0                                                          | 3   | 15.0                                                                          | 3   |
| Upper secondary            | 45.6                                             | 26  | 19.3                                                          | 11  | 17.5                                                                          | 10  |
| Post secondary or tertiary | 55.7                                             | 49  | 20.5                                                          | 18  | 15.9                                                                          | 14  |
| <b>Marital status</b>      |                                                  |     |                                                               |     |                                                                               |     |
| Married                    | 45.9                                             | 39  | 12.9                                                          | 11  | 9.4                                                                           | 8   |
| Previously married         | 50.0                                             | 11  | 9.1                                                           | 2   | 9.1                                                                           | 2   |
| Never married              | 51.7                                             | 30  | 32.8                                                          | 19  | 29.3                                                                          | 17  |
| <b>Employment status</b>   |                                                  |     |                                                               |     |                                                                               |     |
| Employed                   | 47.1                                             | 48  | 18.6                                                          | 19  | 15.7                                                                          | 16  |
| Student, trainee           | 61.1                                             | 11  | 33.3                                                          | 6   | 27.8                                                                          | 5   |
| Retired                    | 40.0                                             | 10  | 16.0                                                          | 4   | 12.0                                                                          | 3   |
| Others                     | 56.7                                             | 17  | 20.0                                                          | 6   | 16.7                                                                          | 5   |
| <b>Perceived health</b>    |                                                  |     |                                                               |     |                                                                               |     |
| (Very) good                | 52.9                                             | 64  | 18.2                                                          | 22  | 15.7                                                                          | 19  |
| (Very) poor to fair        | 37.2                                             | 16  | 23.2                                                          | 10  | 18.6                                                                          | 8   |
| <b>Country</b>             |                                                  |     |                                                               |     |                                                                               |     |
| Belgium                    | 34.0                                             | 17  | 8.0                                                           | 4   | 8.0                                                                           | 4   |
| Germany (PAPI)             | 61.9                                             | 26  | 26.2                                                          | 11  | 23.9                                                                          | 10  |
| Germany (CATI)             | 59.0                                             | 23  | 35.9                                                          | 14  | 25.6                                                                          | 10  |
| Estonia                    | 41.2                                             | 14  | 8.8                                                           | 3   | 8.8                                                                           | 3   |
